# Supplementary material for: The risk of perinatal mortality following short inter-pregnancy intervals—insights from 692 402 pregnancies in 113 Demographic and Health Surveys from 46 countries: a population-based analysis
Source: PubMed Central journal article supplement (PMC10522774; doi:10.1016/s2214-109x(23)00359-5), 2023-09-19

# THE LANCET

## Global Health

### Supplementary appendix

This appendix formed part of the original submission and has been peer reviewed. We post it as supplied by the authors.

Supplement to: Ali MM, Bellizzi S, Shah IH. The risk of perinatal mortality following short inter-pregnancy intervals—insights from 692 402 pregnancies in 113 Demographic and Health Surveys from 46 countries: a population-based analysis. *Lancet Glob Health* 2023; **11**: e1544–52.

## Table of Contents

|                                                                                                                                                         |     |
|---------------------------------------------------------------------------------------------------------------------------------------------------------|-----|
| List of surveys excluded due to insufficient number (<5) of perinatal deaths in each inter-pregnancy Interval (IPI).....                                | 2   |
| E-Table 1a: Number of clusters, households, women, and pregnancies in the analysis sample, by survey .....                                              | 3   |
| E-Table 1b: Number of pregnancies per woman during the analysis period, by survey .....                                                                 | 6   |
| E-Table 2: Pregnancy outcome, by survey .....                                                                                                           | 9   |
| E-Table 3: Percentiles of inter-pregnancy intervals (months), by survey .....                                                                           | 12  |
| E-Table 4: Perinatal mortality rates (PNMRs) with 95% confidence interval (CI), per 1000 births .....                                                   | 15  |
| E-Figure 1: Survey-specific Kaplan-Meier survival probabilities, by IPI group (in months) .....                                                         | 18  |
| E-Figure 2: Survey-specific hazard ratios (HRs) of perinatal mortality, by IPI (months) following livebirth .....                                       | 131 |
| E-Table 6: Tests of proportional-hazards assumption .....                                                                                               | 135 |
| E-Table 7: The pooled hazard ratios (HRs) of perinatal mortality by IPI preceded by livebirth for surveys that met the proportionality assumption ..... | 138 |
| E-Figure 3: Survey-specific hazard ratios of perinatal mortality, by IPI (months) following Stillbirth .....                                            | 139 |
| E-Figure 4: Survey-specific hazard ratios of perinatal mortality, by IPI (months) following abortion .....                                              | 142 |
| E-Figure 5: Correlation of median IPI with contraceptive failure rate, at survey level, for the most recent DHS surveys.....                            | 145 |

**List of surveys excluded due to insufficient number (<5) of perinatal deaths in each inter-pregnancy Interval (IPI)**

| <b>Region</b>                         | <b>Country</b>  | <b>Year of the survey</b> |
|---------------------------------------|-----------------|---------------------------|
| sub-Saharan Africa                    |                 |                           |
|                                       | Comoros         | 2012                      |
|                                       | Lesotho         | 2014                      |
|                                       | Namibia         | 2013                      |
|                                       | South Africa    | 2016                      |
|                                       | Eswatini        | 2006/7                    |
|                                       | Zimbabwe        | 2005/6                    |
| North Africa, Western Asia and Europe |                 |                           |
|                                       | Albania         | 2008/9                    |
|                                       | Albania         | 2017/18                   |
|                                       | Armenia         | 2000                      |
|                                       | Armenia         | 2005                      |
|                                       | Armenia         | 2010                      |
|                                       | Armenia         | 2015/16                   |
|                                       | Azerbaijan      | 2006                      |
|                                       | Jordan          | 2007                      |
|                                       | Moldova         | 2005                      |
|                                       | Türkiye         | 2018/19                   |
|                                       | Ukraine         | 2007                      |
| Central Asia                          |                 |                           |
|                                       | Kyrgyz Republic | 2012                      |
|                                       | Tajikistan      | 2012                      |
|                                       | Tajikistan      | 2017                      |
| South & Southeast Asia                |                 |                           |
|                                       | Cambodia        | 2014                      |
|                                       | Cambodia        | 2021/22                   |
|                                       | Maldives        | 2009                      |
|                                       | Vietnam         | 2002                      |
| Latin America & Caribbean             |                 |                           |
|                                       | Colombia        | 2000                      |
|                                       | Colombia        | 2009/10                   |
|                                       | Colombia        | 2015/16                   |
|                                       | Guyana          | 2009                      |
|                                       | Peru            | 2004/6                    |
|                                       | Peru            | 2010                      |
|                                       | Peru            | 2011                      |
|                                       | Peru            | 2012                      |

**E-Table 1a: Number of clusters, households, women, and pregnancies in the analysis sample, by survey**

| <b>Region</b>             |                     | No. of   | No. of     | HHs per | No. of | Women  | No. of      | Pregnancies |      |
|---------------------------|---------------------|----------|------------|---------|--------|--------|-------------|-------------|------|
|                           | Sample              | Clusters | households | cluster | women  | per HH | pregnancies | per woman   |      |
| <b>sub-Saharan Africa</b> |                     |          |            |         |        |        |             |             |      |
|                           | Angola (2015/16)    | AW       | 625        | 5,615   | 8.98   | 5,738  | 1.02        | 7,821       | 1.36 |
|                           | Benin (2006)        | AW       | 745        | 5,858   | 7.86   | 6,392  | 1.09        | 7,659       | 1.20 |
|                           | Benin (2011/12)     | AW       | 746        | 4,951   | 6.64   | 5,246  | 1.06        | 6,372       | 1.21 |
|                           | Benin (2017/18)     | AW       | 554        | 4,965   | 8.96   | 5,515  | 1.11        | 6,854       | 1.24 |
|                           | Burkina Faso (2003) | AW       | 400        | 3,566   | 8.92   | 4,272  | 1.20        | 4,902       | 1.15 |
|                           | Burkina Faso (2010) | AW       | 573        | 5,260   | 9.18   | 5,974  | 1.14        | 6,938       | 1.16 |
|                           | Burundi (2010/11)   | AW       | 376        | 3,300   | 8.78   | 3,316  | 1.00        | 4,319       | 1.30 |
|                           | Ethiopia (2005)     | AW       | 508        | 3,786   | 7.45   | 3,807  | 1.01        | 4,792       | 1.26 |
|                           | Ethiopia (2011)     | AW       | 563        | 4,196   | 7.45   | 4,234  | 1.01        | 5,288       | 1.25 |
|                           | Ethiopia (2016)     | AW       | 596        | 3,756   | 6.30   | 3,788  | 1.01        | 4,914       | 1.30 |
|                           | Gambia (2013)       | AW       | 279        | 2,231   | 8.00   | 2,839  | 1.27        | 3,230       | 1.14 |
|                           | Gambia (2019/20)    | AW       | 277        | 2,611   | 9.43   | 3,540  | 1.36        | 4,485       | 1.27 |
|                           | Ghana (2003)        | AW       | 375        | 1,320   | 3.52   | 1,365  | 1.03        | 1,598       | 1.17 |
|                           | Ghana (2008)        | AW       | 363        | 1,031   | 2.84   | 1,058  | 1.03        | 1,240       | 1.17 |
|                           | Ghana (2014)        | AW       | 417        | 2,040   | 4.89   | 2,094  | 1.03        | 2,461       | 1.18 |
|                           | Guinea (2005)       | AW       | 292        | 2,015   | 6.90   | 2,261  | 1.12        | 2,528       | 1.12 |
|                           | Guinea (2018)       | AW       | 399        | 2,651   | 6.64   | 2,939  | 1.11        | 3,428       | 1.17 |
|                           | Kenya (2003)        | AW       | 389        | 1,973   | 5.07   | 2,000  | 1.01        | 2,530       | 1.27 |
|                           | Kenya (2008/9)      | AW       | 384        | 2,194   | 5.71   | 2,228  | 1.02        | 2,932       | 1.32 |
|                           | Kenya (2014)        | AW       | 1,275      | 3,264   | 2.56   | 3,291  | 1.01        | 4,007       | 1.22 |
|                           | Kenya (2022)        | AW       | 1,258      | 2,961   | 2.35   | 2,989  | 1.01        | 3,656       | 1.22 |
|                           | Lesotho (2009/10)   | AW       | 358        | 1,107   | 3.09   | 1,133  | 1.02        | 1,293       | 1.14 |
|                           | Liberia (2013)      | AW       | 318        | 2,352   | 7.40   | 2,488  | 1.06        | 2,893       | 1.16 |
|                           | Liberia (2019/20)   | AW       | 322        | 1,875   | 5.82   | 1,943  | 1.04        | 2,326       | 1.20 |
|                           | Madagascar (2003/4) | AW       | 297        | 2,042   | 6.88   | 2,075  | 1.02        | 2,715       | 1.31 |
|                           | Madagascar (2008/9) | AW       | 593        | 4,708   | 7.94   | 4,788  | 1.02        | 6,206       | 1.30 |
|                           | Madagascar (2021)   | AW       | 633        | 3,614   | 5.71   | 3,650  | 1.01        | 4,377       | 1.20 |
|                           | Malawi (2000)       | AW       | 558        | 4,430   | 7.94   | 4,513  | 1.02        | 5,384       | 1.19 |
|                           | Malawi (2004/5)     | AW       | 519        | 4,296   | 8.28   | 4,354  | 1.01        | 5,275       | 1.21 |
|                           | Malawi (2010)       | AW       | 846        | 7,274   | 8.60   | 7,367  | 1.01        | 8,508       | 1.15 |
|                           | Malawi (2015/16)    | AW       | 843        | 5,602   | 6.65   | 5,660  | 1.01        | 6,286       | 1.11 |
|                           | Mali (2001)         | AW       | 402        | 1,598   | 3.98   | 4,951  | 3.10        | 5,856       | 1.18 |
|                           | Mali (2006)         | AW       | 407        | 5,223   | 12.83  | 5,724  | 1.10        | 7,138       | 1.25 |
|                           | Mali (2012/13)      | AW       | 413        | 3,863   | 9.35   | 4,160  | 1.08        | 5,367       | 1.29 |
|                           | Mali (2018)         | AW       | 345        | 3,649   | 10.58  | 3,958  | 1.08        | 5,081       | 1.28 |
|                           | Mozambique (2003/4) | AW       | 597        | 3,799   | 6.36   | 4,026  | 1.06        | 4,938       | 1.23 |
|                           | Mozambique (2011)   | AW       | 604        | 3,956   | 6.55   | 4,082  | 1.03        | 4,867       | 1.19 |
|                           | Namibia (2006/7)    | AW       | 470        | 1,504   | 3.20   | 1,585  | 1.05        | 1,839       | 1.16 |
|                           | Niger (2006)        | AW       | 341        | 3,059   | 8.97   | 3,422  | 1.12        | 3,984       | 1.16 |
|                           | Niger (2012)        | AW       | 474        | 4,549   | 9.60   | 5,036  | 1.11        | 6,140       | 1.22 |
|                           | Nigeria (2008)      | AW       | 884        | 10,442  | 11.81  | 11,480 | 1.10        | 14,800      | 1.29 |
|                           | Nigeria (2013)      | AW       | 893        | 10,956  | 12.27  | 12,061 | 1.10        | 14,879      | 1.23 |

|                                                       |     |        |        |      |        |      |        |      |
|-------------------------------------------------------|-----|--------|--------|------|--------|------|--------|------|
| Nigeria (2018)                                        | AW  | 1,384  | 12,647 | 9.14 | 13,961 | 1.10 | 18,197 | 1.30 |
| Rwanda (2000)                                         | AW  | 442    | 3,169  | 7.17 | 3,188  | 1.01 | 4,206  | 1.32 |
| Rwanda (2005)                                         | AW  | 462    | 3,367  | 7.29 | 3,380  | 1.00 | 4,349  | 1.29 |
| Rwanda (2010/11)                                      | AW  | 491    | 3,526  | 7.18 | 3,542  | 1.00 | 4,344  | 1.23 |
| Rwanda (2014/15)                                      | AW  | 488    | 2,781  | 5.70 | 2,797  | 1.01 | 3,335  | 1.19 |
| Rwanda (2019/20)                                      | AW  | 496    | 2,922  | 5.89 | 2,927  | 1.00 | 3,461  | 1.18 |
| Senegal (2005)                                        | AW  | 372    | 3,129  | 8.41 | 4,004  | 1.28 | 4,783  | 1.19 |
| Senegal (2010/11)                                     | AW  | 390    | 3,795  | 9.73 | 5,021  | 1.32 | 6,459  | 1.29 |
| Senegal (2015)                                        | AW  | 213    | 1,930  | 9.06 | 2,584  | 1.34 | 3,045  | 1.18 |
| Senegal (2016)                                        | AW  | 213    | 1,872  | 8.79 | 2,448  | 1.31 | 2,872  | 1.17 |
| Senegal (2018)                                        | AW  | 212    | 1,897  | 8.95 | 2,510  | 1.32 | 2,939  | 1.17 |
| Senegal (2019)                                        | AW  | 211    | 1,747  | 8.28 | 2,238  | 1.28 | 2,602  | 1.16 |
| Sierra Leone (2008)                                   | AW  | 338    | 1,789  | 5.29 | 1,896  | 1.06 | 2,217  | 1.17 |
| Sierra Leone (2013)                                   | AW  | 434    | 4,001  | 9.22 | 4,275  | 1.07 | 4,976  | 1.16 |
| Tanzania (2004/5)                                     | AW  | 469    | 3,292  | 7.02 | 3,474  | 1.06 | 4,524  | 1.30 |
| Tanzania (2010)                                       | AW  | 461    | 2,578  | 5.59 | 2,715  | 1.05 | 3,242  | 1.19 |
| Tanzania (2015/16)                                    | AW  | 589    | 3,558  | 6.04 | 3,758  | 1.06 | 4,782  | 1.27 |
| Uganda (2000/1)                                       | AW  | 294    | 2,870  | 9.76 | 2,978  | 1.04 | 4,222  | 1.42 |
| Uganda (2006)                                         | AW  | 365    | 3,269  | 8.96 | 3,369  | 1.03 | 4,456  | 1.32 |
| Uganda (2011)                                         | AW  | 403    | 3,140  | 7.79 | 3,222  | 1.03 | 4,279  | 1.33 |
| Zambia (2007)                                         | AW  | 317    | 2,322  | 7.32 | 2,384  | 1.03 | 2,885  | 1.21 |
| Zambia (2013/14)                                      | AW  | 720    | 5,066  | 7.04 | 5,209  | 1.03 | 6,364  | 1.22 |
| Zambia (2018/19)                                      | AW  | 539    | 3,304  | 6.13 | 3,382  | 1.02 | 3,898  | 1.15 |
| Zimbabwe (2010/11)                                    | AW  | 389    | 1,683  | 4.33 | 1,718  | 1.02 | 1,937  | 1.13 |
| Zimbabwe (2015)                                       | AW  | 388    | 1,787  | 4.61 | 1,820  | 1.02 | 2,029  | 1.11 |
| <b><u>North Africa, Western Asia &amp; Europe</u></b> |     |        |        |      |        |      |        |      |
| Egypt (2000)                                          | EMW | 489    | 3,478  | 7.11 | 3,670  | 1.06 | 4,388  | 1.20 |
| Egypt (2003)                                          | EMW | 749    | 2,142  | 2.86 | 2,240  | 1.05 | 2,615  | 1.17 |
| Egypt (2005)                                          | EMW | 671    | 4,225  | 6.30 | 4,478  | 1.06 | 5,233  | 1.17 |
| Egypt (2008)                                          | EMW | 1,076  | 3,139  | 2.92 | 3,253  | 1.04 | 3,673  | 1.13 |
| Egypt (2014)                                          | EMW | 830    | 4,954  | 5.97 | 5,066  | 1.02 | 5,832  | 1.15 |
| Jordan (2002)                                         | EMW | 490    | 2,426  | 4.95 | 2,461  | 1.01 | 3,327  | 1.35 |
| Jordan (2009)                                         | EMW | 909    | 3,935  | 4.33 | 3,965  | 1.01 | 5,389  | 1.36 |
| Jordan (2012)                                         | EMW | 798    | 4,223  | 5.29 | 4,269  | 1.01 | 5,651  | 1.32 |
| Jordan (2017/18)                                      | EMW | 933    | 4,094  | 4.39 | 4,135  | 1.01 | 5,313  | 1.28 |
| Morocco (2003/4)                                      | AW  | 461    | 2,048  | 4.44 | 2,128  | 1.04 | 2,546  | 1.20 |
| Türkiye (2003/4)                                      | EMW | 505    | 1,576  | 3.12 | 1,627  | 1.03 | 2,135  | 1.31 |
| Yemen (2013)                                          | AW  | 774    | 5,960  | 7.70 | 6,335  | 1.06 | 8,485  | 1.34 |
| <b><u>Central, South &amp; Southeast Asia</u></b>     |     |        |        |      |        |      |        |      |
| Bangladesh (2004)                                     | EMW | 359    | 2,251  | 6.27 | 2,300  | 1.02 | 2,727  | 1.19 |
| Bangladesh (2007)                                     | EMW | 349    | 1,609  | 4.61 | 1,648  | 1.02 | 1,853  | 1.12 |
| Bangladesh (2011)                                     | EMW | 559    | 2,177  | 3.89 | 2,235  | 1.03 | 2,480  | 1.11 |
| Bangladesh (2014)                                     | EMW | 526    | 1,718  | 3.27 | 1,742  | 1.01 | 1,899  | 1.09 |
| Bangladesh (2017/18)                                  | EMW | 617    | 2,163  | 3.51 | 2,203  | 1.02 | 2,427  | 1.10 |
| Cambodia (2010/11)                                    | AW  | 592    | 2,640  | 4.46 | 2,662  | 1.01 | 3,091  | 1.16 |
| India (2005/6)                                        | AW  | 3,594  | 17,971 | 5.00 | 18,541 | 1.03 | 23,029 | 1.24 |
| India (2015/16)                                       | AW  | 24,500 | 77,540 | 3.16 | 79,558 | 1.03 | 93,613 | 1.18 |
| India (2019/21)                                       | AW  | 24,734 | 71,359 | 2.89 | 73,051 | 1.02 | 86,095 | 1.18 |
| Indonesia (2002/3)                                    | EMW | 1,230  | 4,217  | 3.43 | 4,253  | 1.01 | 4,760  | 1.12 |
| Indonesia (2007)                                      | EMW | 1,463  | 4,467  | 3.05 | 4,501  | 1.01 | 5,092  | 1.13 |

|                                             |     |                |                |             |                |             |                |             |
|---------------------------------------------|-----|----------------|----------------|-------------|----------------|-------------|----------------|-------------|
| Indonesia (2012)                            | AW  | 1,488          | 3,838          | 2.58        | 3,876          | 1.01        | 4,305          | 1.11        |
| Indonesia (2017)                            | AW  | 1,623          | 4,014          | 2.47        | 4,064          | 1.01        | 4,488          | 1.10        |
| Myanmar (2015/16)                           | AW  | 367            | 1,368          | 3.73        | 1,380          | 1.01        | 1,685          | 1.22        |
| Nepal (2006)                                | AW  | 256            | 2,170          | 8.48        | 2,252          | 1.04        | 2,762          | 1.23        |
| Nepal (2011)                                | AW  | 279            | 1,806          | 6.47        | 1,851          | 1.02        | 2,225          | 1.20        |
| Nepal (2016/17)                             | AW  | 353            | 1,418          | 4.02        | 1,464          | 1.03        | 1,679          | 1.15        |
| Nepal (2021/22)                             | AW  | 425            | 1,620          | 3.81        | 1,659          | 1.02        | 1,915          | 1.15        |
| Pakistan (2012/13)                          | EMW | 496            | 4,533          | 9.14        | 4,968          | 1.10        | 7,056          | 1.42        |
| Pakistan (2017/18)                          | EMW | 456            | 3,866          | 8.48        | 4,290          | 1.11        | 5,849          | 1.36        |
| Philippines (2003)                          | AW  | 737            | 2,388          | 3.24        | 2,410          | 1.01        | 3,100          | 1.29        |
| Philippines (2022)                          | AW  | 885            | 1,917          | 2.17        | 1,931          | 1.01        | 2,211          | 1.15        |
| Timor-Leste (2009/10)                       | AW  | 454            | 3,895          | 8.58        | 3,963          | 1.02        | 5,396          | 1.36        |
| <b><u>Latin America &amp; Caribbean</u></b> |     |                |                |             |                |             |                |             |
| Bolivia (2003/4)                            | AW  | 931            | 3,729          | 4.01        | 3,763          | 1.01        | 4,856          | 1.29        |
| Bolivia (2008)                              | AW  | 860            | 2,503          | 2.91        | 2,525          | 1.01        | 2,988          | 1.18        |
| Colombia (2005)                             | AW  | 2,330          | 4,496          | 1.93        | 4,576          | 1.02        | 5,526          | 1.21        |
| Dominican Republic (2002)                   | AW  | 1,187          | 3,871          | 3.26        | 3,914          | 1.01        | 4,933          | 1.26        |
| Guatemala (2014/15)                         | AW  | 822            | 4,033          | 4.91        | 4,134          | 1.03        | 5,052          | 1.22        |
| Honduras (2005/6)                           | AW  | 977            | 3,832          | 3.92        | 3,905          | 1.02        | 4,933          | 1.26        |
| Honduras (2011/12)                          | AW  | 1,020          | 3,260          | 3.20        | 3,320          | 1.02        | 3,876          | 1.17        |
| Nicaragua (2001)                            | AW  | 561            | 2,199          | 3.92        | 2,274          | 1.03        | 2,856          | 1.26        |
| Peru (2000)                                 | AW  | 1,187          | 4,148          | 3.49        | 4,201          | 1.01        | 5,002          | 1.19        |
| Peru (2007/8)                               | AW  | 796            | 2,297          | 2.89        | 2,327          | 1.01        | 2,617          | 1.12        |
| Peru (2009)                                 | AW  | 935            | 2,600          | 2.78        | 2,635          | 1.01        | 2,930          | 1.11        |
| <b>All surveys</b>                          |     | <b>120,224</b> | <b>540,996</b> | <b>4.50</b> | <b>570,145</b> | <b>1.05</b> | <b>692,402</b> | <b>1.21</b> |

AW=All woman, EMW=Ever-married woman, HH=Household.

The analysis sample includes all index pregnancies conceived between 7-66 months before the survey month (the analysis period).

**E-Table 1b: Number of pregnancies per woman during the analysis period, by survey**

| <b>Region</b>             | No. of pregnancies* | Number of women with: |       |     |    |   |    |
|---------------------------|---------------------|-----------------------|-------|-----|----|---|----|
|                           |                     | 1                     | 2     | 3   | 4  | 5 | 6+ |
| <b>sub-Saharan Africa</b> |                     |                       |       |     |    |   |    |
| Angola (2015/16)          | 7,942               | 3,756                 | 1,767 | 209 | 5  | 1 |    |
| Benin (2006)              | 7,871               | 5,009                 | 1,295 | 80  | 8  |   |    |
| Benin (2011/12)           | 6,538               | 4,086                 | 1,042 | 105 | 12 | 1 |    |
| Benin (2017/18)           | 7,031               | 4,124                 | 1,275 | 107 | 9  |   |    |
| Burkina Faso (2003)       | 4,980               | 3,595                 | 647   | 29  | 1  |   |    |
| Burkina Faso (2010)       | 7,078               | 4,926                 | 996   | 48  | 4  |   |    |
| Burundi (2010/11)         | 4,359               | 2,340                 | 909   | 67  |    |   |    |
| Ethiopia (2005)           | 4,833               | 2,882                 | 837   | 77  | 9  | 2 |    |
| Ethiopia (2011)           | 5,372               | 3,219                 | 905   | 97  | 13 |   |    |
| Ethiopia (2016)           | 4,983               | 2,761                 | 877   | 133 | 16 | 1 |    |
| Gambia (2013)             | 3,270               | 2,425                 | 398   | 15  | 1  |   |    |
| Gambia (2019/20)          | 4,566               | 2,581                 | 899   | 55  | 3  | 2 |    |
| Ghana (2003)              | 1,630               | 1,121                 | 223   | 21  |    |   |    |
| Ghana (2008)              | 1,268               | 863                   | 181   | 13  | 1  |   |    |
| Ghana (2014)              | 2,512               | 1,706                 | 360   | 26  | 2  |   |    |
| Guinea (2005)             | 2,588               | 1,949                 | 299   | 11  | 2  |   |    |
| Guinea (2018)             | 3,496               | 2,417                 | 490   | 29  | 3  |   |    |
| Kenya (2003)              | 2,569               | 1,497                 | 438   | 64  | 1  |   |    |
| Kenya (2008/9)            | 2,971               | 1,567                 | 587   | 67  | 6  | 1 |    |
| Kenya (2014)              | 4,054               | 2,579                 | 665   | 43  | 4  |   |    |
| Kenya (2022)              | 3,713               | 2,352                 | 554   | 80  | 2  | 1 |    |
| Lesotho (2009/10)         | 1,315               | 963                   | 160   | 9   |    | 1 |    |
| Liberia (2013)            | 2,950               | 2,055                 | 408   | 21  | 4  |   |    |
| Liberia (2019/20)         | 2,375               | 1,550                 | 357   | 33  | 3  |   |    |
| Madagascar (2003/4)       | 2,729               | 1,499                 | 502   | 70  | 4  |   |    |
| Madagascar (2008/9)       | 6,261               | 3,467                 | 1,182 | 126 | 13 |   |    |
| Madagascar (2021)         | 4,415               | 2,955                 | 631   | 59  | 4  | 1 |    |
| Malawi (2000)             | 5,495               | 3,605                 | 841   | 61  | 5  | 1 |    |
| Malawi (2004/5)           | 5,359               | 3,423                 | 861   | 66  | 4  |   |    |
| Malawi (2010)             | 8,680               | 6,131                 | 1,161 | 73  | 2  |   |    |
| Malawi (2015/16)          | 6,405               | 4,951                 | 677   | 28  | 4  |   |    |
| Mali (2001)               | 5,935               | 4,036                 | 847   | 67  | 1  |   |    |
| Mali (2006)               | 7,252               | 4,311                 | 1,311 | 94  | 3  | 5 |    |
| Mali (2012/13)            | 5,458               | 3,005                 | 1,023 | 122 | 9  | 1 |    |
| Mali (2018)               | 5,164               | 2,861                 | 997   | 92  | 7  | 1 |    |
| Mozambique (2003/4)       | 5,049               | 3,073                 | 890   | 58  | 3  | 2 |    |
| Mozambique (2011)         | 4,960               | 3,273                 | 744   | 62  | 2  | 1 |    |
| Namibia (2006/7)          | 1,863               | 1,333                 | 227   | 24  | 1  |   |    |
| Niger (2006)              | 4,061               | 2,826                 | 554   | 41  | 1  |   |    |
| Niger (2012)              | 6,244               | 3,909                 | 1,051 | 71  | 5  |   |    |
| Nigeria (2008)            | 15,031              | 8,235                 | 2,968 | 253 | 23 |   | 1  |
| Nigeria (2013)            | 15,113              | 9,230                 | 2,633 | 182 | 13 | 2 | 1  |
| Nigeria (2018)            | 18,526              | 9,850                 | 3,691 | 387 | 32 | 1 |    |

|                                                       |        |        |        |       |    |   |
|-------------------------------------------------------|--------|--------|--------|-------|----|---|
| Rwanda (2000)                                         | 4,256  | 2,235  | 852    | 88    | 12 | 1 |
| Rwanda (2005)                                         | 4,396  | 2,432  | 886    | 57    | 4  | 1 |
| Rwanda (2010/11)                                      | 4,403  | 2,755  | 716    | 68    | 3  |   |
| Rwanda (2014/15)                                      | 3,373  | 2,261  | 497    | 38    | 1  |   |
| Rwanda (2019/20)                                      | 3,499  | 2,393  | 497    | 36    | 1  |   |
| Senegal (2005)                                        | 4,864  | 3,191  | 768    | 43    | 2  |   |
| Senegal (2010/11)                                     | 6,574  | 3,606  | 1,283  | 126   | 6  |   |
| Senegal (2015)                                        | 3,107  | 2,087  | 474    | 20    | 3  |   |
| Senegal (2016)                                        | 2,932  | 1,988  | 437    | 22    | 1  |   |
| Senegal (2018)                                        | 2,996  | 2,053  | 429    | 27    | 1  |   |
| Senegal (2019)                                        | 2,652  | 1,843  | 377    | 17    | 1  |   |
| Sierra Leone (2008)                                   | 2,256  | 1,566  | 303    | 24    | 3  |   |
| Sierra Leone (2013)                                   | 5,057  | 3,527  | 714    | 34    |    |   |
| Tanzania (2004/5)                                     | 4,609  | 2,448  | 927    | 90    | 8  | 1 |
| Tanzania (2010)                                       | 3,286  | 2,181  | 500    | 32    | 1  | 1 |
| Tanzania (2015/16)                                    | 4,854  | 2,756  | 916    | 78    | 8  |   |
| Uganda (2000/1)                                       | 4,281  | 1,825  | 1,013  | 131   | 8  | 1 |
| Uganda (2006)                                         | 4,521  | 2,317  | 958    | 89    | 4  | 1 |
| Uganda (2011)                                         | 4,337  | 2,205  | 925    | 86    | 6  |   |
| Zambia (2007)                                         | 2,935  | 1,863  | 492    | 28    | 1  |   |
| Zambia (2013/14)                                      | 6,471  | 4,031  | 1,097  | 78    | 3  |   |
| Zambia (2018/19)                                      | 3,954  | 2,850  | 497    | 30    | 5  |   |
| Zimbabwe (2010/11)                                    | 1,967  | 1,491  | 207    | 18    | 2  |   |
| Zimbabwe (2015)                                       | 2,062  | 1,595  | 209    | 15    | 1  |   |
| <b><u>North Africa, Western Asia &amp; Europe</u></b> |        |        |        |       |    |   |
| Egypt (2000)                                          | 4,471  | 2,938  | 667    | 61    | 4  |   |
| Egypt (2003)                                          | 2,654  | 1,855  | 357    | 27    | 1  |   |
| Egypt (2005)                                          | 5,327  | 3,680  | 747    | 51    |    |   |
| Egypt (2008)                                          | 3,736  | 2,801  | 423    | 27    | 2  |   |
| Egypt (2014)                                          | 5,922  | 4,258  | 762    | 44    | 2  |   |
| Jordan (2002)                                         | 3,374  | 1,665  | 687    | 101   | 8  |   |
| Jordan (2009)                                         | 5,465  | 2,683  | 1,082  | 183   | 16 | 1 |
| Jordan (2012)                                         | 5,736  | 2,995  | 1,097  | 162   | 14 | 1 |
| Jordan (2017/18)                                      | 5,367  | 3,032  | 985    | 107   | 11 |   |
| Morocco (2003/4)                                      | 2,585  | 1,709  | 385    | 30    | 4  |   |
| Türkiye (2003/4)                                      | 2,152  | 1,190  | 357    | 73    | 6  | 1 |
| Yemen (2013)                                          | 8,553  | 4,398  | 1,681  | 232   | 23 | 1 |
| <b><u>Central, South &amp; Southeast Asia</u></b>     |        |        |        |       |    |   |
| Bangladesh (2004)                                     | 2,750  | 1,889  | 374    | 35    | 2  |   |
| Bangladesh (2007)                                     | 1,868  | 1,444  | 189    | 14    | 1  |   |
| Bangladesh (2011)                                     | 2,496  | 1,988  | 234    | 12    | 1  |   |
| Bangladesh (2014)                                     | 1,911  | 1,585  | 145    | 12    |    |   |
| Bangladesh (2017/18)                                  | 2,446  | 1,971  | 222    | 9     | 1  |   |
| Cambodia (2010/11)                                    | 3,116  | 2,243  | 385    | 33    | 1  |   |
| India (2005/6)                                        | 23,172 | 14,372 | 3,730  | 416   | 23 |   |
| India (2015/16)                                       | 94,283 | 65,931 | 12,576 | 1,005 | 45 | 1 |
| India (2019/21)                                       | 86,735 | 60,367 | 11,722 | 924   | 38 |   |
| Indonesia (2002/3)                                    | 4,791  | 3,750  | 472    | 28    | 2  | 1 |
| Indonesia (2007)                                      | 5,121  | 3,918  | 547    | 35    | 1  |   |
| Indonesia (2012)                                      | 4,341  | 3,448  | 394    | 31    | 3  |   |



|                                             |                |                |                |           |          |           |          |
|---------------------------------------------|----------------|----------------|----------------|-----------|----------|-----------|----------|
| Indonesia (2017)                            | 4,511          | 3,642          | 397            | 25        |          |           |          |
| Myanmar (2015/16)                           | 1,702          | 1,091          | 257            | 31        | 1        |           |          |
| Nepal (2006)                                | 2,787          | 1,760          | 451            | 39        | 2        |           |          |
| Nepal (2011)                                | 2,243          | 1,492          | 328            | 29        | 2        |           |          |
| Nepal (2016/17)                             | 1,690          | 1,259          | 184            | 21        |          |           |          |
| Nepal (2021/22)                             | 1,927          | 1,406          | 238            | 15        |          |           |          |
| Pakistan (2012/13)                          | 7,122          | 3,185          | 1,456          | 283       | 44       |           |          |
| Pakistan (2017/18)                          | 5,924          | 2,912          | 1,141          | 218       | 19       |           |          |
| Philippines (2003)                          | 3,124          | 1,778          | 556            | 70        | 6        |           |          |
| Philippines (2022)                          | 2,230          | 1,655          | 253            | 23        |          |           |          |
| Timor-Leste (2009/10)                       | 5,449          | 2,606          | 1,235          | 116       | 5        | 1         |          |
| <b><u>Latin America &amp; Caribbean</u></b> |                |                |                |           |          |           |          |
| Bolivia (2003/4)                            | 4,884          | 2,755          | 902            | 99        | 7        |           |          |
| Bolivia (2008)                              | 3,003          | 2,073          | 426            | 26        |          |           |          |
| Colombia (2005)                             | 5,576          | 3,681          | 791            | 103       | 1        |           |          |
| Dominican Republic (2002)                   | 4,993          | 2,960          | 840            | 104       | 9        | 1         |          |
| Guatemala (2014/15)                         | 5,089          | 3,245          | 825            | 62        | 2        |           |          |
| Honduras (2005/6)                           | 4,969          | 2,924          | 903            | 73        | 5        |           |          |
| Honduras (2011/12)                          | 3,909          | 2,775          | 501            | 44        |          |           |          |
| Nicaragua (2001)                            | 2,880          | 1,736          | 475            | 58        | 5        |           |          |
| Peru (2000)                                 | 5,039          | 3,425          | 715            | 60        | 1        |           |          |
| Peru (2007/8)                               | 2,634          | 2,040          | 268            | 18        | 1        |           |          |
| Peru (2009)                                 | 2,952          | 2,333          | 287            | 15        |          |           |          |
| <b>All surveys</b>                          | <b>700,915</b> | <b>450,638</b> | <b>108,983</b> | <b>87</b> | <b>6</b> | <b>39</b> | <b>2</b> |

The analysis period is 7-66 months before the survey month

\* Including pregnancies ending in multiple livebirths.

**E-Table 2: Pregnancy outcome, by survey**

| Region<br>Survey                 | Stillbirth | Currently<br>pregnant | Livebirth* | Single<br>birth | Multiple<br>birth |
|----------------------------------|------------|-----------------------|------------|-----------------|-------------------|
| <b><u>sub-Saharan Africa</u></b> |            |                       |            |                 |                   |
| Angola (2015/16)                 | 57         | 375                   | 7,510      | 7,270           | 240               |
| Benin (2006)                     | 81         | 484                   | 7,306      | 6,886           | 420               |
| Benin (2011/12)                  | 36         | 311                   | 6,191      | 5,836           | 355               |
| Benin (2017/18)                  | 53         | 366                   | 6,612      | 6,261           | 351               |
| Burkina Faso (2003)              | 53         | 318                   | 4,609      | 4,454           | 155               |
| Burkina Faso (2010)              | 69         | 448                   | 6,561      | 6,284           | 277               |
| Burundi (2010/11)                | 68         | 259                   | 4,032      | 3,952           | 80                |
| Ethiopia (2005)                  | 35         | 338                   | 4,460      | 4,378           | 82                |
| Ethiopia (2011)                  | 67         | 359                   | 4,946      | 4,778           | 168               |
| Ethiopia (2016)                  | 46         | 338                   | 4,599      | 4,461           | 138               |
| Gambia (2013)                    | 37         | 237                   | 2,996      | 2,917           | 79                |
| Gambia (2019/20)                 | 84         | 284                   | 4,198      | 4,039           | 159               |
| Ghana (2003)                     | 15         | 117                   | 1,498      | 1,434           | 64                |
| Ghana (2008)                     | 14         | 74                    | 1,180      | 1,124           | 56                |
| Ghana (2014)                     | 26         | 147                   | 2,339      | 2,238           | 101               |
| Guinea (2005)                    | 25         | 232                   | 2,331      | 2,211           | 120               |
| Guinea (2018)                    | 51         | 204                   | 3,241      | 3,105           | 136               |
| Kenya (2003)                     | 36         | 170                   | 2,363      | 2,285           | 78                |
| Kenya (2008/9)                   | 28         | 135                   | 2,808      | 2,730           | 78                |
| Kenya (2014)                     | 42         | 226                   | 3,786      | 3,692           | 94                |
| Kenya (2022)                     | 68         | 238                   | 3,407      | 3,294           | 113               |
| Lesotho (2009/10)                | 15         | 62                    | 1,238      | 1,195           | 43                |
| Liberia (2013)                   | 34         | 233                   | 2,683      | 2,570           | 113               |
| Liberia (2019/20)                | 29         | 139                   | 2,207      | 2,109           | 98                |
| Madagascar (2003/4)              | 26         | 159                   | 2,544      | 2,516           | 28                |
| Madagascar (2008/9)              | 70         | 320                   | 5,871      | 5,762           | 109               |
| Madagascar (2021)                | 58         | 262                   | 4,095      | 4,019           | 76                |
| Malawi (2000)                    | 53         | 413                   | 5,029      | 4,808           | 221               |
| Malawi (2004/5)                  | 63         | 353                   | 4,943      | 4,777           | 166               |
| Malawi (2010)                    | 113        | 522                   | 8,045      | 7,702           | 343               |
| Malawi (2015/16)                 | 73         | 387                   | 5,945      | 5,708           | 237               |
| Mali (2001)                      | 69         | 472                   | 5,394      | 5,237           | 157               |
| Mali (2006)                      | 87         | 499                   | 6,666      | 6,439           | 227               |
| Mali (2012/13)                   | 34         | 277                   | 5,147      | 4,965           | 182               |
| Mali (2018)                      | 64         | 280                   | 4,820      | 4,654           | 166               |
| Mozambique (2003/4)              | 72         | 296                   | 4,681      | 4,460           | 221               |
| Mozambique (2011)                | 43         | 355                   | 4,562      | 4,376           | 186               |
| Namibia (2006/7)                 | 18         | 126                   | 1,719      | 1,671           | 48                |
| Niger (2006)                     | 44         | 329                   | 3,688      | 3,536           | 152               |
| Niger (2012)                     | 88         | 442                   | 5,714      | 5,508           | 206               |
| Nigeria (2008)                   | 114        | 948                   | 13,969     | 13,513          | 456               |
| Nigeria (2013)                   | 163        | 1,221                 | 13,729     | 13,262          | 467               |
| Nigeria (2018)                   | 297        | 1,174                 | 17,055     | 16,404          | 651               |

|                                                       |      |      |       |        |      |
|-------------------------------------------------------|------|------|-------|--------|------|
| Rwanda (2000)                                         | 68   | 265  | 3,923 | 3,823  | 100  |
| Rwanda (2005)                                         | 68   | 265  | 4,063 | 3,969  | 94   |
| Rwanda (2010/11)                                      | 67   | 206  | 4,130 | 4,012  | 118  |
| Rwanda (2014/15)                                      | 52   | 178  | 3,143 | 3,067  | 76   |
| Rwanda (2019/20)                                      | 46   | 173  | 3,280 | 3,204  | 76   |
| Senegal (2005)                                        | 86   | 307  | 4,471 | 4,310  | 161  |
| Senegal (2010/11)                                     | 114  | 351  | 6,109 | 5,878  | 231  |
| Senegal (2015)                                        | 66   | 188  | 2,853 | 2,729  | 124  |
| Senegal (2016)                                        | 40   | 189  | 2703  | 2,585  | 118  |
| Senegal (2018)                                        | 48   | 217  | 2731  | 2,619  | 112  |
| Senegal (2019)                                        | 49   | 185  | 2418  | 2,317  | 101  |
| Sierra Leone (2008)                                   | 19   | 163  | 2074  | 1,996  | 78   |
| Sierra Leone (2013)                                   | 37   | 342  | 4678  | 4,516  | 162  |
| Tanzania (2004/5)                                     | 85   | 284  | 4240  | 4,071  | 169  |
| Tanzania (2010)                                       | 57   | 241  | 2988  | 2,900  | 88   |
| Tanzania (2015/16)                                    | 81   | 260  | 4513  | 4,370  | 143  |
| Uganda (2000/1)                                       | 68   | 230  | 3983  | 3,865  | 118  |
| Uganda (2006)                                         | 62   | 280  | 4179  | 4,048  | 131  |
| Uganda (2011)                                         | 71   | 267  | 3999  | 3,883  | 116  |
| Zambia (2007)                                         | 31   | 198  | 2706  | 2,607  | 99   |
| Zambia (2013/14)                                      | 84   | 340  | 6047  | 5,835  | 212  |
| Zambia (2018/19)                                      | 52   | 266  | 3636  | 3,524  | 112  |
| Zimbabwe (2010/11)                                    | 18   | 167  | 1782  | 1,723  | 59   |
| Zimbabwe (2015)                                       | 27   | 119  | 1916  | 1,850  | 66   |
| <b><u>North Africa, Western Asia &amp; Europe</u></b> |      |      |       |        |      |
| Egypt (2000)                                          | 73   | 227  | 4171  | 4,007  | 164  |
| Egypt (2003)                                          | 31   | 138  | 2485  | 2,406  | 79   |
| Egypt (2005)                                          | 50   | 276  | 5001  | 4,813  | 188  |
| Egypt (2008)                                          | 29   | 212  | 3495  | 3,369  | 126  |
| Egypt (2014)                                          | 32   | 357  | 5533  | 5,356  | 177  |
| Jordan (2002)                                         | 34   | 211  | 3129  | 3,038  | 91   |
| Jordan (2009)                                         | 54   | 331  | 5080  | 4,928  | 152  |
| Jordan (2012)                                         | 38   | 287  | 5411  | 5,245  | 166  |
| Jordan (2017/18)                                      | 15   | 358  | 4994  | 4,888  | 106  |
| Morocco (2003/4)                                      | 40   | 163  | 2382  | 2,308  | 74   |
| Türkiye (2003/4)                                      | 34   | 104  | 2014  | 1,980  | 34   |
| Yemen (2013)                                          | 130  | 539  | 7884  | 7,748  | 136  |
| <b><u>Central, South &amp; Southeast Asia</u></b>     |      |      |       |        |      |
| Bangladesh (2004)                                     | 94   | 148  | 2508  | 2,462  | 46   |
| Bangladesh (2007)                                     | 46   | 123  | 1699  | 1,669  | 30   |
| Bangladesh (2011)                                     | 49   | 184  | 2263  | 2,231  | 32   |
| Bangladesh (2014)                                     | 44   | 152  | 1715  | 1,691  | 24   |
| Bangladesh (2017/18)                                  | 50   | 155  | 2241  | 2,203  | 38   |
| Cambodia (2010/11)                                    | 21   | 201  | 2894  | 2,845  | 49   |
| India (2005/6)                                        | 358  | 1387 | 21427 | 21,141 | 286  |
| India (2015/16)                                       | 1049 | 5725 | 87509 | 86,162 | 1347 |
| India (2019/21)                                       | 841  | 4963 | 80931 | 79,656 | 1275 |
| Indonesia (2002/3)                                    | 46   | 318  | 4427  | 4,365  | 62   |
| Indonesia (2007)                                      | 48   | 345  | 4728  | 4,670  | 58   |
| Indonesia (2012)                                      | 45   | 327  | 3969  | 3,897  | 72   |

|                                             |              |               |                |                |               |
|---------------------------------------------|--------------|---------------|----------------|----------------|---------------|
| Indonesia (2017)                            | 36           | 351           | 4124           | 4,079          | 45            |
| Myanmar (2015/16)                           | 17           | 89            | 1596           | 1,563          | 33            |
| Nepal (2006)                                | 68           | 135           | 2584           | 2,534          | 50            |
| Nepal (2011)                                | 26           | 113           | 2104           | 2,068          | 36            |
| Nepal (2016/17)                             | 26           | 102           | 1562           | 1,538          | 24            |
| Nepal (2021/22)                             | 26           | 107           | 1794           | 1,770          | 24            |
| Pakistan (2012/13)                          | 193          | 392           | 6537           | 6,406          | 131           |
| Pakistan (2017/18)                          | 137          | 329           | 5458           | 5,309          | 149           |
| Philippines (2003)                          | 35           | 191           | 2898           | 2,850          | 48            |
| Philippines (2022)                          | 22           | 124           | 2084           | 2,046          | 38            |
| Timor-Leste (2009/10)                       | 13           | 261           | 5175           | 5,069          | 106           |
| <b><u>Latin America &amp; Caribbean</u></b> |              |               |                |                |               |
| Bolivia (2003/4)                            | 48           | 233           | 4603           | 4,547          | 56            |
| Bolivia (2008)                              | 33           | 191           | 2779           | 2,749          | 30            |
| Colombia (2005)                             | 44           | 264           | 5268           | 5,169          | 99            |
| Dominican Republic (2002)                   | 54           | 267           | 4672           | 4,554          | 118           |
| Guatemala (2014/15)                         | 49           | 294           | 4746           | 4,672          | 74            |
| Honduras (2005/6)                           | 56           | 251           | 4662           | 4,591          | 71            |
| Honduras (2011/12)                          | 37           | 233           | 3639           | 3,573          | 66            |
| Nicaragua (2001)                            | 26           | 158           | 2696           | 2,648          | 48            |
| Peru (2000)                                 | 44           | 293           | 4702           | 4,629          | 73            |
| Peru (2007/8)                               | 24           | 199           | 2411           | 2,377          | 34            |
| Peru (2009)                                 | 21           | 198           | 2733           | 2,689          | 44            |
| <b>All surveys</b>                          | <b>8,300</b> | <b>42,616</b> | <b>649,999</b> | <b>633,029</b> | <b>16,970</b> |

\* Including multiple livebirths.

**E-Table 3: Percentiles of inter-pregnancy intervals (months), by survey**

| Region                    | P25  | Median | P75  | IQR  |
|---------------------------|------|--------|------|------|
| <b>sub-Saharan Africa</b> |      |        |      |      |
| Angola (2015/16)          | 13   | 18     | 25   | 12   |
| Benin (2006)              | 14   | 21     | 28   | 14   |
| Benin (2011/12)           | 15   | 21     | 29   | 14   |
| Benin (2017/18)           | 15   | 21     | 28   | 13   |
| Burkina Faso (2003)       | 16   | 23     | 30   | 14   |
| Burkina Faso (2010)       | 16   | 22     | 29   | 13   |
| Burundi (2010/11)         | 12   | 18     | 25   | 13   |
| Ethiopia (2005)           | 13   | 20     | 29   | 16   |
| Ethiopia (2011)           | 12   | 18     | 27   | 15   |
| Ethiopia (2016)           | 11   | 18     | 26   | 15   |
| Gambia (2013)             | 15   | 20     | 26   | 11   |
| Gambia (2019/20)          | 15   | 21     | 28   | 13   |
| Ghana (2003)              | 14   | 21     | 29   | 15   |
| Ghana (2008)              | 13.5 | 20     | 30   | 16.5 |
| Ghana (2014)              | 13   | 20     | 28   | 15   |
| Guinea (2005)             | 16   | 25     | 30.5 | 14.5 |
| Guinea (2018)             | 14   | 21     | 29   | 15   |
| Kenya (2003)              | 11   | 17     | 23   | 12   |
| Kenya (2008/9)            | 11   | 17     | 25   | 14   |
| Kenya (2014)              | 12   | 18     | 25   | 13   |
| Kenya (2022)              | 10   | 16     | 24   | 14   |
| Lesotho (2009/10)         | 14   | 22     | 31   | 17   |
| Liberia (2013)            | 13   | 19     | 27   | 14   |
| Liberia (2019/20)         | 13   | 20     | 29   | 16   |
| Madagascar (2003/4)       | 11   | 17     | 26   | 15   |
| Madagascar (2008/9)       | 12   | 18     | 26   | 14   |
| Madagascar (2021)         | 10   | 17     | 26   | 16   |
| Malawi (2000)             | 14   | 20     | 27   | 13   |
| Malawi (2004/5)           | 15   | 21     | 29   | 14   |
| Malawi (2010)             | 14   | 21     | 28   | 14   |
| Malawi (2015/16)          | 15   | 24     | 33   | 18   |
| Mali (2001)               | 13   | 19     | 27   | 14   |
| Mali (2006)               | 13   | 18     | 25   | 12   |
| Mali (2012/13)            | 13   | 19     | 28   | 15   |
| Mali (2018)               | 12   | 18     | 26   | 14   |
| Mozambique (2003/4)       | 14   | 20     | 27   | 13   |
| Mozambique (2011)         | 15   | 21     | 27   | 12   |
| Namibia (2006/7)          | 14   | 21     | 30   | 16   |
| Niger (2006)              | 13   | 19     | 26   | 13   |
| Niger (2012)              | 13   | 18     | 25   | 12   |
| Nigeria (2008)            | 12   | 18     | 26   | 14   |
| Nigeria (2013)            | 13   | 18     | 25   | 12   |
| Nigeria (2018)            | 13   | 18     | 26   | 13   |

|                                                       |     |    |    |    |
|-------------------------------------------------------|-----|----|----|----|
| Rwanda (2000)                                         | 10  | 17 | 25 | 15 |
| Rwanda (2005)                                         | 11  | 17 | 23 | 12 |
| Rwanda (2010/11)                                      | 12  | 18 | 26 | 14 |
| Rwanda (2014/15)                                      | 12  | 20 | 30 | 18 |
| Rwanda (2019/20)                                      | 12  | 20 | 30 | 18 |
| Senegal (2005)                                        | 13  | 18 | 25 | 12 |
| Senegal (2010/11)                                     | 14  | 20 | 27 | 13 |
| Senegal (2015)                                        | 14  | 19 | 26 | 12 |
| Senegal (2016)                                        | 14  | 19 | 26 | 12 |
| Senegal (2018)                                        | 14  | 20 | 27 | 13 |
| Senegal (2019)                                        | 14  | 20 | 27 | 13 |
| Sierra Leone (2008)                                   | 13  | 20 | 28 | 15 |
| Sierra Leone (2013)                                   | 14  | 20 | 28 | 14 |
| Tanzania (2004/5)                                     | 13  | 19 | 26 | 13 |
| Tanzania (2010)                                       | 13  | 18 | 24 | 11 |
| Tanzania (2015/16)                                    | 12  | 18 | 26 | 14 |
| Uganda (2000/1)                                       | 11  | 16 | 23 | 12 |
| Uganda (2006)                                         | 11  | 16 | 23 | 12 |
| Uganda (2011)                                         | 11  | 17 | 23 | 12 |
| Zambia (2007)                                         | 14  | 19 | 26 | 12 |
| Zambia (2013/14)                                      | 14  | 20 | 28 | 14 |
| Zambia (2018/19)                                      | 15  | 21 | 29 | 14 |
| Zimbabwe (2010/11)                                    | 15  | 24 | 34 | 19 |
| Zimbabwe (2015)                                       | 13  | 21 | 31 | 18 |
| <b><u>North Africa, Western Asia &amp; Europe</u></b> |     |    |    |    |
| Egypt (2000)                                          | 7   | 15 | 23 | 16 |
| Egypt (2003)                                          | 8   | 16 | 24 | 16 |
| Egypt (2005)                                          | 8   | 16 | 24 | 16 |
| Egypt (2008)                                          | 9   | 17 | 25 | 16 |
| Egypt (2014)                                          | 8   | 15 | 24 | 16 |
| Jordan (2002)                                         | 6   | 12 | 20 | 14 |
| Jordan (2009)                                         | 6   | 12 | 20 | 14 |
| Jordan (2012)                                         | 6   | 13 | 21 | 15 |
| Jordan (2017/18)                                      | 7   | 14 | 24 | 17 |
| Morocco (2003/4)                                      | 10  | 18 | 29 | 19 |
| Türkiye (2003/4)                                      | 7   | 14 | 22 | 15 |
| Yemen (2013)                                          | 7   | 14 | 23 | 16 |
| <b><u>Central, South &amp; Southeast Asia</u></b>     |     |    |    |    |
| Bangladesh (2004)                                     | 10  | 17 | 27 | 17 |
| Bangladesh (2007)                                     | 9.5 | 17 | 26 | 17 |
| Bangladesh (2011)                                     | 10  | 18 | 29 | 19 |
| Bangladesh (2014)                                     | 9   | 17 | 29 | 20 |
| Bangladesh (2017/18)                                  | 10  | 19 | 31 | 21 |
| Cambodia (2010/11)                                    | 10  | 17 | 26 | 16 |
| India (2005/6)                                        | 9   | 15 | 23 | 14 |
| India (2015/16)                                       | 9   | 15 | 23 | 14 |
| India (2019/21)                                       | 10  | 16 | 25 | 15 |
| Indonesia (2002/3)                                    | 11  | 18 | 29 | 18 |
| Indonesia (2007)                                      | 9   | 17 | 28 | 19 |
| Indonesia (2012)                                      | 8   | 16 | 27 | 19 |

|                                             |    |    |    |    |
|---------------------------------------------|----|----|----|----|
| Indonesia (2017)                            | 8  | 17 | 29 | 21 |
| Myanmar (2015/16)                           | 11 | 18 | 29 | 18 |
| Nepal (2006)                                | 11 | 17 | 26 | 15 |
| Nepal (2011)                                | 11 | 17 | 26 | 15 |
| Nepal (2016/17)                             | 9  | 16 | 26 | 17 |
| Nepal (2021/22)                             | 10 | 16 | 26 | 16 |
| Pakistan (2012/13)                          | 7  | 14 | 21 | 14 |
| Pakistan (2017/18)                          | 8  | 15 | 23 | 15 |
| Philippines (2003)                          | 7  | 13 | 21 | 14 |
| Philippines (2022)                          | 9  | 15 | 25 | 16 |
| Timor-Leste (2009/10)                       | 12 | 16 | 23 | 11 |
| <b><u>Latin America &amp; Caribbean</u></b> |    |    |    |    |
| Bolivia (2003/4)                            | 10 | 16 | 23 | 13 |
| Bolivia (2008)                              | 10 | 15 | 22 | 12 |
| Colombia (2005)                             | 10 | 16 | 25 | 15 |
| Dominican Republic (2002)                   | 7  | 14 | 22 | 15 |
| Guatemala (2014/15)                         | 12 | 18 | 27 | 15 |
| Honduras (2005/6)                           | 12 | 18 | 27 | 15 |
| Honduras (2011/12)                          | 11 | 18 | 28 | 17 |
| Nicaragua (2001)                            | 9  | 15 | 22 | 13 |
| Peru (2000)                                 | 11 | 17 | 25 | 14 |
| Peru (2007/8)                               | 11 | 17 | 25 | 14 |
| Peru (2009)                                 | 11 | 18 | 27 | 16 |

---

P25=25%; Median=50%; P75=75% of distribution. IQR=Inter-quartile range.

**E-Table 4: Perinatal mortality rates (PNMRs) with 95% confidence interval (CI), per 1000 births**

| Region<br>Survey                 | PNMR | 95% CI        |
|----------------------------------|------|---------------|
| <b><u>sub-Saharan Africa</u></b> |      |               |
| Angola (2015/16)                 | 26.6 | (23.2 - 30.5) |
| Benin (2006)                     | 31.2 | (27.5 - 35.3) |
| Benin (2011/12)                  | 26.0 | (22.3 - 30.2) |
| Benin (2017/18)                  | 31.7 | (27.8 - 36.2) |
| Burkina Faso (2003)              | 25.9 | (21.7 - 30.8) |
| Burkina Faso (2010)              | 30.3 | (26.5 - 34.6) |
| Burundi (2010/11)                | 36.6 | (31.3 - 42.7) |
| Ethiopia (2005)                  | 29.5 | (25.0 - 34.8) |
| Ethiopia (2011)                  | 42.4 | (37.2 - 48.3) |
| Ethiopia (2016)                  | 34.4 | (29.6 - 40.0) |
| Gambia (2013)                    | 27.5 | (22.3 - 33.8) |
| Gambia (2019/20)                 | 46.0 | (40.2 - 52.6) |
| Ghana (2003)                     | 42.3 | (33.3 - 53.6) |
| Ghana (2008)                     | 36.2 | (27.0 - 48.3) |
| Ghana (2014)                     | 34.0 | (27.5 - 42.1) |
| Guinea (2005)                    | 43.6 | (36.2 - 52.6) |
| Guinea (2018)                    | 45.6 | (39.0 - 53.2) |
| Kenya (2003)                     | 44.9 | (37.4 - 53.9) |
| Kenya (2008/9)                   | 34.5 | (28.4 - 41.8) |
| Kenya (2014)                     | 27.1 | (22.4 - 32.7) |
| Kenya (2022)                     | 37.0 | (31.3 - 43.8) |
| Lesotho (2009/10)                | 42.5 | (32.7 - 55.2) |
| Liberia (2013)                   | 38.4 | (31.9 - 46.3) |
| Liberia (2019/20)                | 51.1 | (42.8 - 61.0) |
| Madagascar (2003/4)              | 24.7 | (19.4 - 31.4) |
| Madagascar (2008/9)              | 26.5 | (22.8 - 30.9) |
| Madagascar (2021)                | 29.3 | (24.6 - 34.8) |
| Malawi (2000)                    | 38.2 | (33.3 - 43.8) |
| Malawi (2004/5)                  | 33.5 | (29.0 - 38.9) |
| Malawi (2010)                    | 31.9 | (28.4 - 35.9) |
| Malawi (2015/16)                 | 31.2 | (27.1 - 35.8) |
| Mali (2001)                      | 45.0 | (39.8 - 50.8) |
| Mali (2006)                      | 46.7 | (41.9 - 51.9) |
| Mali (2012/13)                   | 36.2 | (31.4 - 41.6) |
| Mali (2018)                      | 40.5 | (35.3 - 46.3) |



|                     |      |       |   |       |
|---------------------|------|-------|---|-------|
| Mozambique (2003/4) | 35.7 | (30.9 | - | 41.3) |
| Mozambique (2011)   | 36.7 | (31.7 | - | 42.5) |
| Namibia (2006/7)    | 27.5 | (20.9 | - | 36.3) |
| Niger (2006)        | 32.8 | (27.6 | - | 39.0) |
| Niger (2012)        | 31.9 | (27.7 | - | 36.6) |
| Nigeria (2008)      | 39.1 | (36.1 | - | 42.4) |
| Nigeria (2013)      | 40.3 | (37.2 | - | 43.7) |
| Nigeria (2018)      | 48.1 | (45.1 | - | 51.4) |
| Rwanda (2000)       | 49.3 | (43.1 | - | 56.5) |
| Rwanda (2005)       | 42.4 | (36.7 | - | 48.9) |
| Rwanda (2010/11)    | 35.2 | (30.1 | - | 41.2) |
| Rwanda (2014/15)    | 29.2 | (24.0 | - | 35.6) |
| Rwanda (2019/20)    | 28.8 | (23.7 | - | 35.0) |
| Senegal (2005)      | 36.1 | (31.2 | - | 41.9) |
| Senegal (2010/11)   | 39.7 | (35.2 | - | 44.8) |
| Senegal (2015)      | 36.7 | (30.5 | - | 44.0) |
| Senegal (2016)      | 30.8 | (25.0 | - | 37.9) |
| Senegal (2018)      | 37.3 | (30.9 | - | 44.9) |
| Senegal (2019)      | 36.3 | (29.8 | - | 44.4) |
| Sierra Leone (2008) | 36.2 | (29.0 | - | 45.0) |
| Sierra Leone (2013) | 39.1 | (34.0 | - | 45.0) |
| Tanzania (2004/5)   | 40.4 | (35.0 | - | 46.7) |
| Tanzania (2010)     | 35.4 | (29.5 | - | 42.5) |
| Tanzania (2015/16)  | 35.2 | (30.3 | - | 40.9) |
| Uganda (2000/1)     | 36.4 | (31.1 | - | 42.6) |
| Uganda (2006)       | 32.1 | (27.3 | - | 37.8) |
| Uganda (2011)       | 34.6 | (29.5 | - | 40.6) |
| Zambia (2007)       | 30.3 | (24.6 | - | 37.4) |
| Zambia (2013/14)    | 31.6 | (27.5 | - | 36.2) |
| Zambia (2018/19)    | 34.6 | (29.2 | - | 40.9) |
| Zimbabwe (2010/11)  | 34.2 | (26.8 | - | 43.5) |
| Zimbabwe (2015)     | 30.6 | (23.9 | - | 39.2) |

**North Africa Western Asia & Europe**

|                  |      |       |   |       |
|------------------|------|-------|---|-------|
| Egypt (2000)     | 32.1 | (27.3 | - | 37.8) |
| Egypt (2003)     | 26.8 | (21.2 | - | 33.8) |
| Egypt (2005)     | 25.8 | (21.8 | - | 30.5) |
| Egypt (2008)     | 20.0 | (15.9 | - | 25.1) |
| Egypt (2014)     | 16.4 | (13.4 | - | 20.0) |
| Jordan (2002)    | 22.7 | (18.1 | - | 28.5) |
| Jordan (2009)    | 22.9 | (19.2 | - | 27.4) |
| Jordan (2012)    | 16.7 | (13.7 | - | 20.5) |
| Jordan (2017/18) | 10.4 | (7.9  | - | 13.6) |
| Morocco (2003/4) | 35.3 | (28.7 | - | 43.3) |

|                                                   |      |               |
|---------------------------------------------------|------|---------------|
| Türkiye (2003/4)                                  | 28.5 | (22.2 - 36.6) |
| Yemen (2013)                                      | 33.9 | (30.2 - 38.1) |
| <b><u>Central, South &amp; Southeast Asia</u></b> |      |               |
| Bangladesh (2004)                                 | 56.9 | (48.8 - 66.4) |
| Bangladesh (2007)                                 | 49.3 | (40.2 - 60.4) |
| Bangladesh (2011)                                 | 40.4 | (33.2 - 49.1) |
| Bangladesh (2014)                                 | 43.5 | (35.1 - 53.9) |
| Bangladesh (2017/18)                              | 40.1 | (32.9 - 48.8) |
| Cambodia (2010/11)                                | 29.4 | (23.9 - 36.1) |
| India (2005/6)                                    | 40.4 | (37.9 - 43.1) |
| India (2015/16)                                   | 35.2 | (34.0 - 36.4) |
| India (2019/21)                                   | 29.5 | (28.4 - 30.7) |
| Indonesia (2002/3)                                | 25.7 | (21.5 - 30.7) |
| Indonesia (2007)                                  | 27.0 | (22.8 - 31.9) |
| Indonesia (2012)                                  | 28.8 | (24.1 - 34.4) |
| Indonesia (2017)                                  | 19.8 | (16.0 - 24.4) |
| Myanmar (2015/16)                                 | 32.3 | (24.8 - 42.1) |
| Nepal (2006)                                      | 50.1 | (42.5 - 59.0) |
| Nepal (2011)                                      | 40.2 | (32.7 - 49.4) |
| Nepal (2016/17)                                   | 36.2 | (28.1 - 46.5) |
| Nepal (2021/22)                                   | 29.4 | (22.7 - 38.2) |
| Pakistan (2012/13)                                | 67.6 | (61.9 - 73.8) |
| Pakistan (2017/18)                                | 54.8 | (49.2 - 61.0) |
| Philippines (2003)                                | 25.5 | (20.5 - 31.8) |
| Philippines (2022)                                | 23.6 | (18.0 - 31.0) |
| Timor-Leste (2009/10)                             | 20.1 | (16.6 - 24.3) |
| <b><u>Latin America &amp; Caribbean</u></b>       |      |               |
| Bolivia (2003/4)                                  | 28.3 | (24.0 - 33.5) |
| Bolivia (2008)                                    | 27.4 | (22.0 - 34.0) |
| Colombia (2005)                                   | 15.0 | (12.1 - 18.7) |
| Dominican Republic (2002)                         | 23.9 | (20.0 - 28.7) |
| Guatemala (2014/15)                               | 20.9 | (17.3 - 25.3) |
| Honduras (2005/6)                                 | 22.5 | (18.7 - 27.1) |
| Honduras (2011/12)                                | 21.2 | (17.0 - 26.3) |
| Nicaragua (2001)                                  | 20.1 | (15.5 - 26.0) |
| Peru (2000)                                       | 22.4 | (18.6 - 27.0) |
| Peru (2007/8)                                     | 18.6 | (14.0 - 24.6) |
| Peru (2009)                                       | 15.8 | (11.8 - 21.2) |

---

\*Note the rates are based on women who had at least one index pregnancy during the analysis period.

# E-Figure 1: Survey-specific Kaplan-Meier survival probabilities, by IPI group (in months)

## E-Figure 1.1: Angola (2015/16)

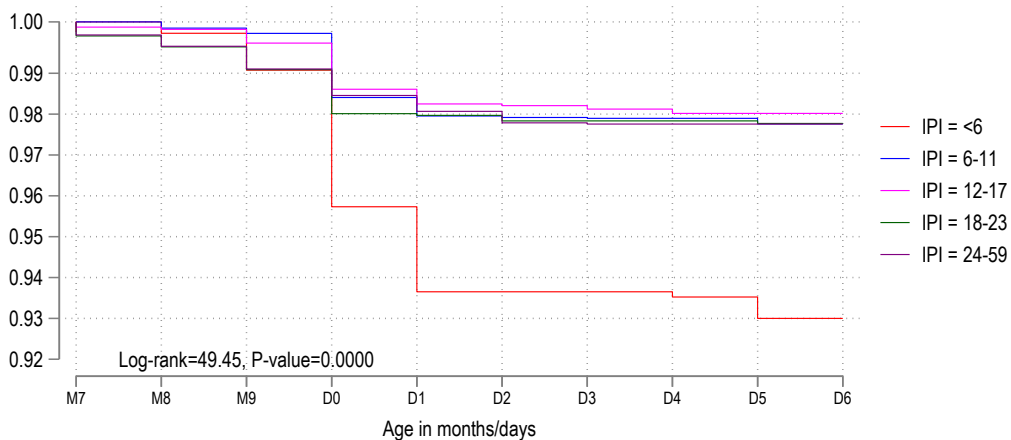

### Number at risk

|             | M7   | M8   | M9   | D0   | D1   | D2   | D3   | D4   | D5   | D6   |
|-------------|------|------|------|------|------|------|------|------|------|------|
| IPI = <6    | 680  | 670  | 658  | 647  | 625  | 611  | 611  | 611  | 610  | 607  |
| IPI = 6-11  | 983  | 977  | 967  | 959  | 943  | 939  | 939  | 939  | 939  | 937  |
| IPI = 12-17 | 1888 | 1866 | 1828 | 1812 | 1791 | 1785 | 1784 | 1782 | 1780 | 1780 |
| IPI = 18-23 | 1584 | 1552 | 1509 | 1486 | 1469 | 1469 | 1467 | 1467 | 1467 | 1466 |
| IPI = 24-59 | 2151 | 2071 | 2001 | 1963 | 1950 | 1942 | 1937 | 1936 | 1936 | 1936 |

### E-Figure 1.2: Benin (2006)

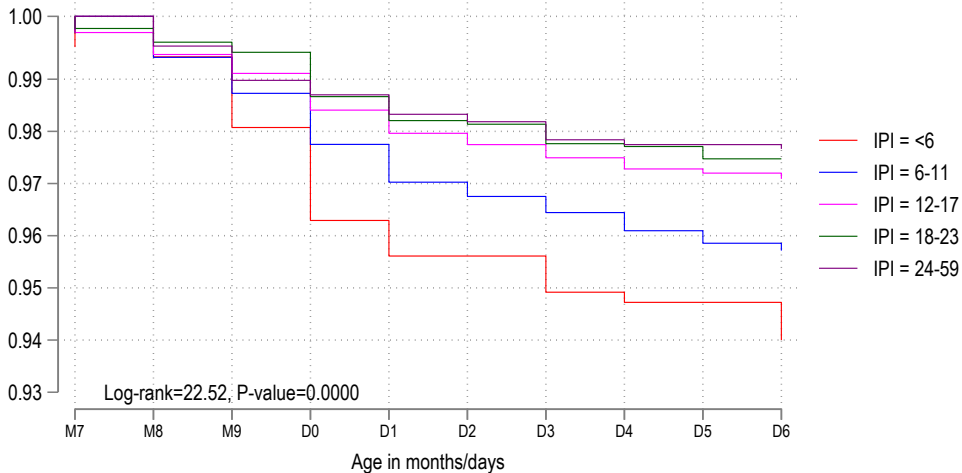

#### Number at risk

|             |      |      |      |      |      |      |      |      |      |      |
|-------------|------|------|------|------|------|------|------|------|------|------|
| IPI = <6    | 459  | 451  | 440  | 428  | 420  | 417  | 417  | 414  | 413  | 413  |
| IPI = 6-11  | 795  | 774  | 758  | 745  | 738  | 733  | 731  | 728  | 726  | 724  |
| IPI = 12-17 | 1548 | 1522 | 1485 | 1468 | 1457 | 1451 | 1447 | 1444 | 1440 | 1439 |
| IPI = 18-23 | 1940 | 1894 | 1843 | 1821 | 1806 | 1797 | 1796 | 1789 | 1788 | 1783 |
| IPI = 24-59 | 3028 | 2899 | 2795 | 2741 | 2733 | 2723 | 2719 | 2710 | 2707 | 2707 |

E-Figure 1.3: Benin (2011/12)

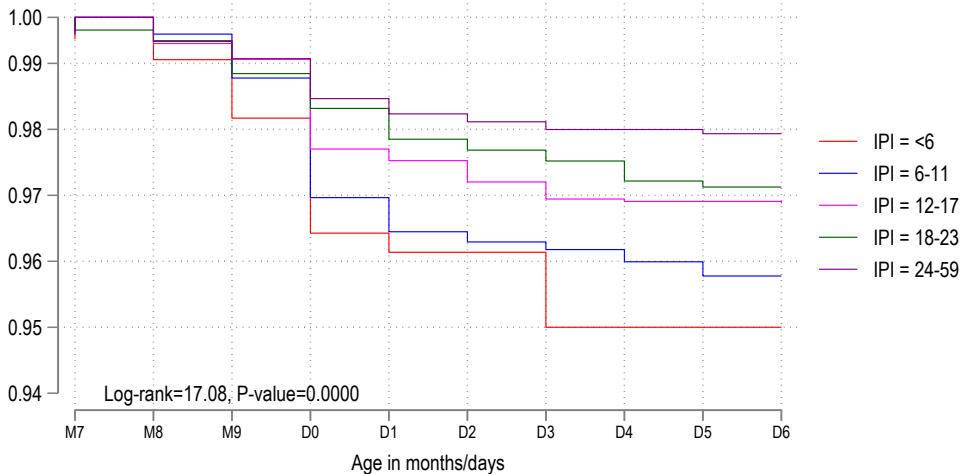

Number at risk

|             |      |      |      |      |      |      |      |      |      |      |
|-------------|------|------|------|------|------|------|------|------|------|------|
| IPI = <6    | 326  | 323  | 320  | 307  | 302  | 301  | 301  | 297  | 297  | 297  |
| IPI = 6-11  | 655  | 634  | 628  | 621  | 609  | 606  | 605  | 604  | 603  | 602  |
| IPI = 12-17 | 1338 | 1317 | 1302 | 1277 | 1260 | 1257 | 1253 | 1250 | 1249 | 1249 |
| IPI = 18-23 | 1403 | 1371 | 1342 | 1326 | 1319 | 1313 | 1311 | 1308 | 1304 | 1303 |
| IPI = 24-59 | 2633 | 2552 | 2488 | 2441 | 2426 | 2420 | 2418 | 2415 | 2415 | 2413 |

E-Figure 1.4: Benin (2017/18)

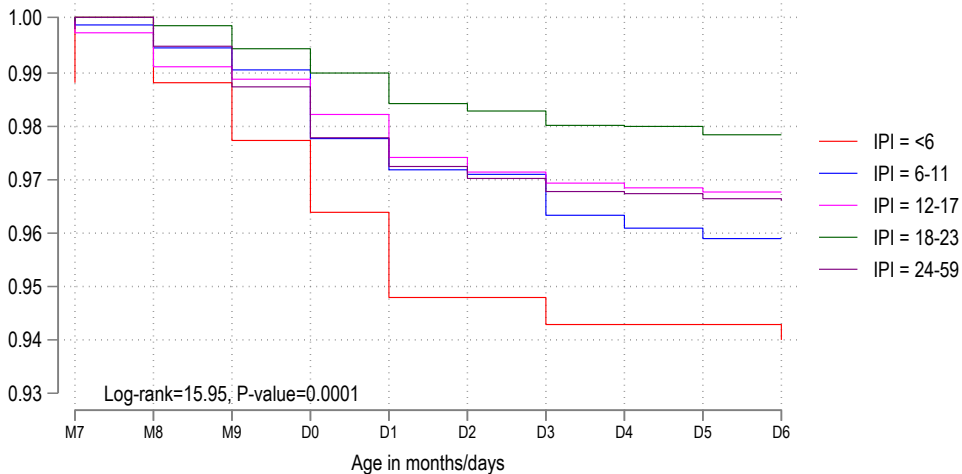

Number at risk

|             |      |      |      |      |      |      |      |      |      |      |
|-------------|------|------|------|------|------|------|------|------|------|------|
| IPI = <6    | 333  | 327  | 321  | 316  | 311  | 306  | 306  | 305  | 305  | 305  |
| IPI = 6-11  | 683  | 672  | 659  | 657  | 648  | 644  | 644  | 639  | 637  | 636  |
| IPI = 12-17 | 1501 | 1477 | 1450 | 1441 | 1432 | 1420 | 1416 | 1413 | 1412 | 1411 |
| IPI = 18-23 | 1736 | 1704 | 1667 | 1646 | 1638 | 1629 | 1626 | 1622 | 1621 | 1619 |
| IPI = 24-59 | 2783 | 2679 | 2593 | 2550 | 2525 | 2511 | 2506 | 2499 | 2498 | 2496 |

E-Figure 1.5: Burkina Faso (2003)

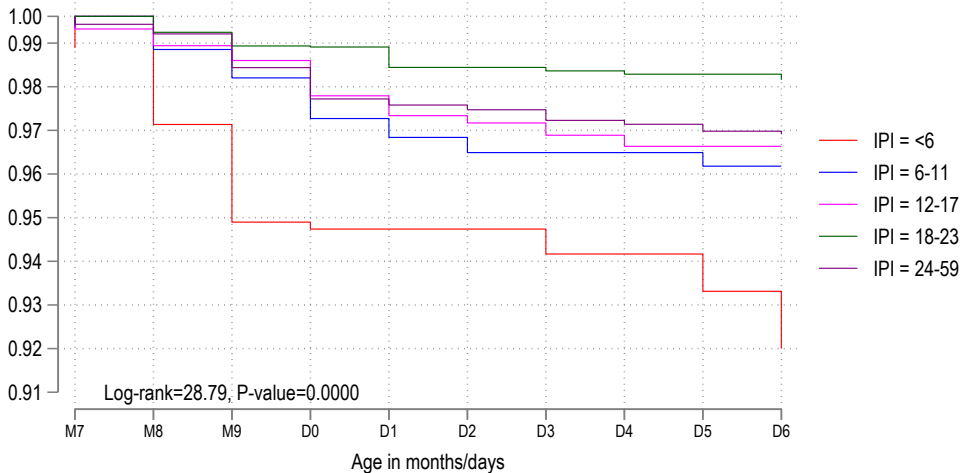

Number at risk

|             |      |      |      |      |      |      |      |      |      |      |
|-------------|------|------|------|------|------|------|------|------|------|------|
| IPI = <6    | 243  | 236  | 229  | 224  | 223  | 223  | 223  | 222  | 222  | 220  |
| IPI = 6-11  | 492  | 482  | 475  | 467  | 462  | 460  | 459  | 459  | 459  | 457  |
| IPI = 12-17 | 908  | 892  | 862  | 857  | 850  | 846  | 844  | 842  | 840  | 840  |
| IPI = 18-23 | 1101 | 1080 | 1063 | 1050 | 1050 | 1045 | 1045 | 1044 | 1043 | 1043 |
| IPI = 24-59 | 2457 | 2358 | 2244 | 2206 | 2190 | 2187 | 2184 | 2179 | 2177 | 2173 |

E-Figure 1.6: Burkina Faso (2010)

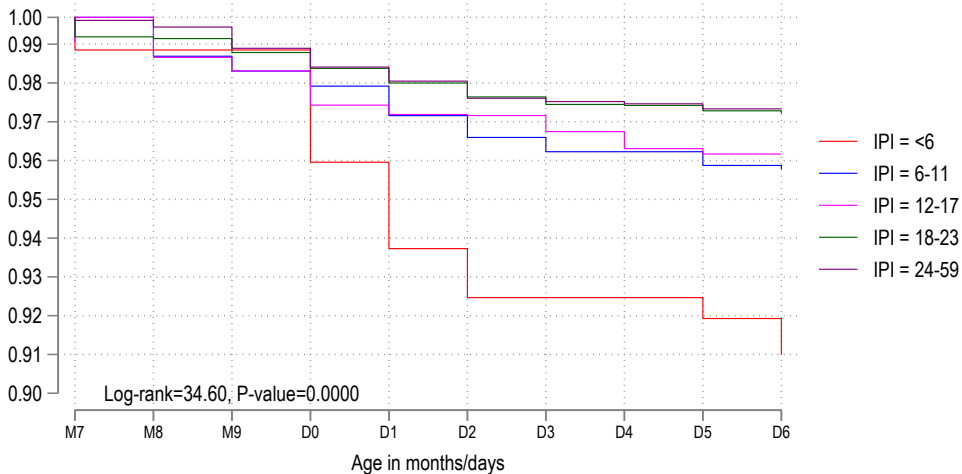

Number at risk

|             |      |      |      |      |      |      |      |      |      |      |
|-------------|------|------|------|------|------|------|------|------|------|------|
| IPI = <6    | 234  | 230  | 221  | 221  | 215  | 210  | 207  | 207  | 207  | 206  |
| IPI = 6-11  | 647  | 637  | 624  | 621  | 618  | 614  | 610  | 608  | 608  | 606  |
| IPI = 12-17 | 1409 | 1375 | 1334 | 1327 | 1315 | 1312 | 1311 | 1306 | 1300 | 1298 |
| IPI = 18-23 | 1793 | 1737 | 1697 | 1676 | 1670 | 1663 | 1657 | 1654 | 1653 | 1651 |
| IPI = 24-59 | 3219 | 3112 | 2960 | 2927 | 2912 | 2902 | 2889 | 2886 | 2884 | 2881 |



E-Figure 1.7: Burundi (2010/11)

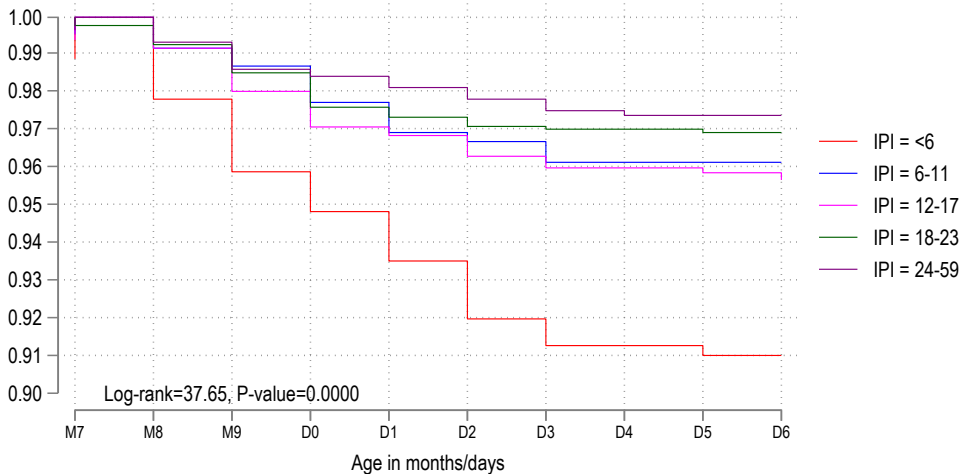

Number at risk

|             |      |      |      |      |      |      |      |      |      |      |
|-------------|------|------|------|------|------|------|------|------|------|------|
| IPI = <6    | 445  | 434  | 418  | 408  | 404  | 398  | 392  | 389  | 389  | 388  |
| IPI = 6-11  | 584  | 574  | 564  | 561  | 556  | 551  | 550  | 547  | 547  | 547  |
| IPI = 12-17 | 1094 | 1062 | 1030 | 1014 | 1005 | 1002 | 997  | 994  | 994  | 992  |
| IPI = 18-23 | 1061 | 1033 | 980  | 968  | 959  | 956  | 954  | 953  | 953  | 952  |
| IPI = 24-59 | 1341 | 1293 | 1229 | 1216 | 1213 | 1210 | 1206 | 1202 | 1201 | 1201 |

E-Figure 1.8: Ethiopia (2005)

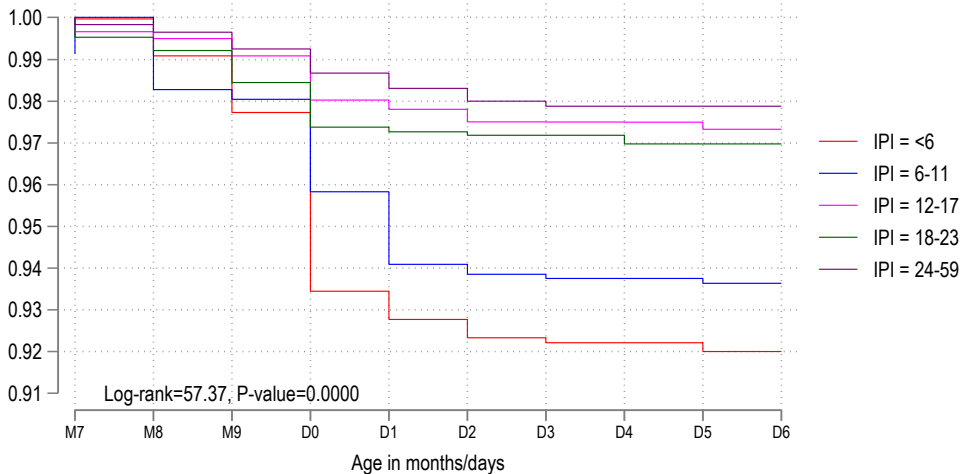

Number at risk

|             |      |      |      |      |      |      |      |      |      |      |
|-------------|------|------|------|------|------|------|------|------|------|------|
| IPI = <6    | 410  | 401  | 387  | 380  | 363  | 361  | 359  | 358  | 358  | 358  |
| IPI = 6-11  | 764  | 738  | 722  | 713  | 697  | 684  | 682  | 681  | 681  | 681  |
| IPI = 12-17 | 1157 | 1131 | 1103 | 1086 | 1074 | 1072 | 1069 | 1069 | 1068 | 1067 |
| IPI = 18-23 | 1117 | 1087 | 1055 | 1033 | 1022 | 1021 | 1020 | 1020 | 1018 | 1018 |
| IPI = 24-59 | 2272 | 2195 | 2089 | 2040 | 2028 | 2020 | 2014 | 2012 | 2012 | 2012 |

### E-Figure 1.9: Ethiopia (2011)

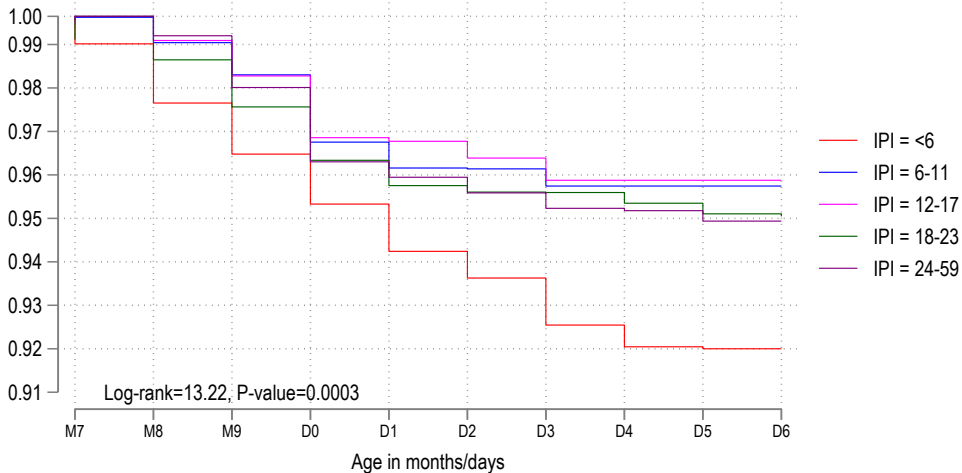

#### Number at risk

|             |      |      |      |      |      |      |      |      |      |      |
|-------------|------|------|------|------|------|------|------|------|------|------|
| IPI = <6    | 529  | 513  | 501  | 491  | 485  | 480  | 477  | 471  | 469  | 468  |
| IPI = 6-11  | 753  | 749  | 731  | 714  | 703  | 698  | 698  | 695  | 695  | 695  |
| IPI = 12-17 | 1056 | 1034 | 1009 | 999  | 985  | 984  | 980  | 975  | 975  | 975  |
| IPI = 18-23 | 1065 | 1023 | 984  | 968  | 956  | 950  | 949  | 949  | 946  | 944  |
| IPI = 24-59 | 1984 | 1894 | 1822 | 1769 | 1739 | 1732 | 1726 | 1719 | 1718 | 1714 |

E-Figure 1.10: Ethiopia (2016)

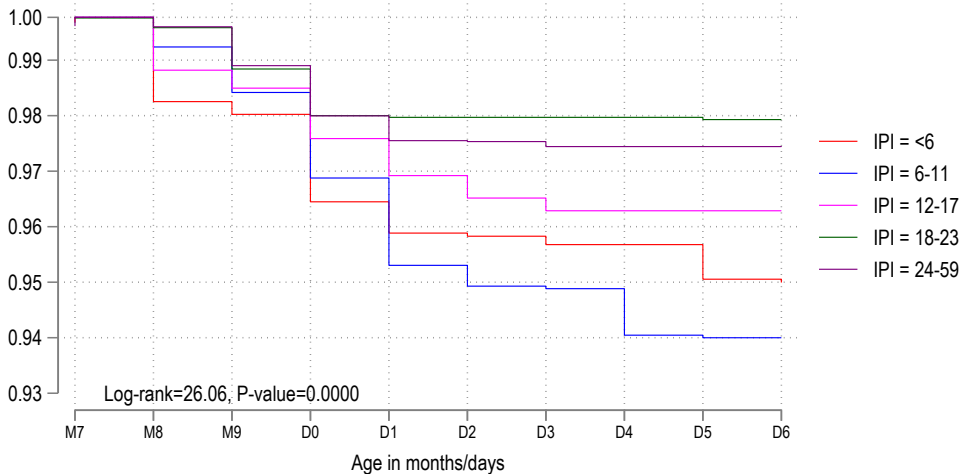

Number at risk

|             |      |      |      |      |      |      |      |      |      |      |
|-------------|------|------|------|------|------|------|------|------|------|------|
| IPI = <6    | 517  | 503  | 492  | 490  | 483  | 480  | 480  | 479  | 479  | 476  |
| IPI = 6-11  | 642  | 635  | 620  | 609  | 599  | 590  | 587  | 587  | 582  | 582  |
| IPI = 12-17 | 1081 | 1075 | 1045 | 1031 | 1022 | 1015 | 1011 | 1008 | 1008 | 1008 |
| IPI = 18-23 | 914  | 884  | 845  | 820  | 813  | 813  | 813  | 813  | 813  | 812  |
| IPI = 24-59 | 1775 | 1711 | 1651 | 1605 | 1590 | 1583 | 1582 | 1581 | 1581 | 1581 |

### E-Figure 1.11: Gambia (2013)

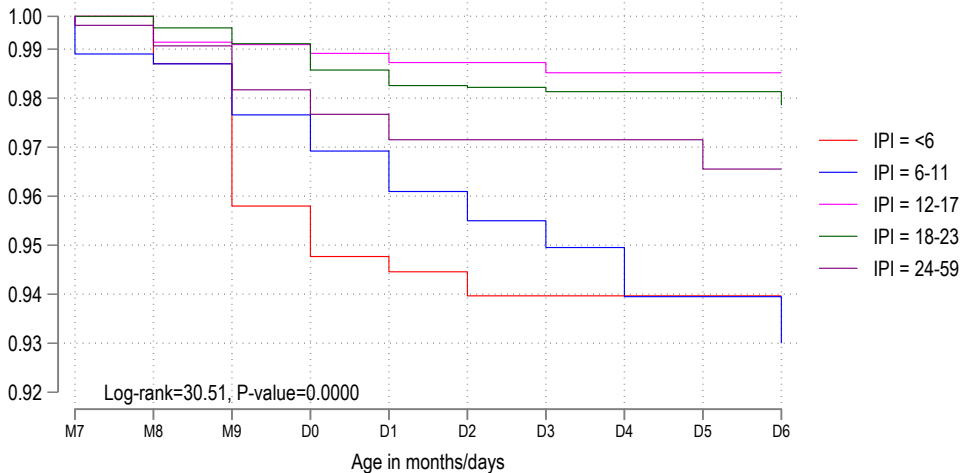

#### Number at risk

|             |      |      |      |      |      |     |     |     |     |     |
|-------------|------|------|------|------|------|-----|-----|-----|-----|-----|
| IPI = <6    | 155  | 153  | 149  | 144  | 142  | 142 | 141 | 141 | 141 | 141 |
| IPI = 6-11  | 294  | 283  | 276  | 270  | 268  | 265 | 264 | 262 | 259 | 259 |
| IPI = 12-17 | 718  | 699  | 674  | 668  | 667  | 665 | 665 | 664 | 664 | 664 |
| IPI = 18-23 | 878  | 862  | 836  | 821  | 817  | 814 | 814 | 813 | 813 | 813 |
| IPI = 24-59 | 1146 | 1093 | 1030 | 1008 | 1003 | 998 | 998 | 998 | 998 | 992 |

E-Figure 1.12: Gambia (2019/20)

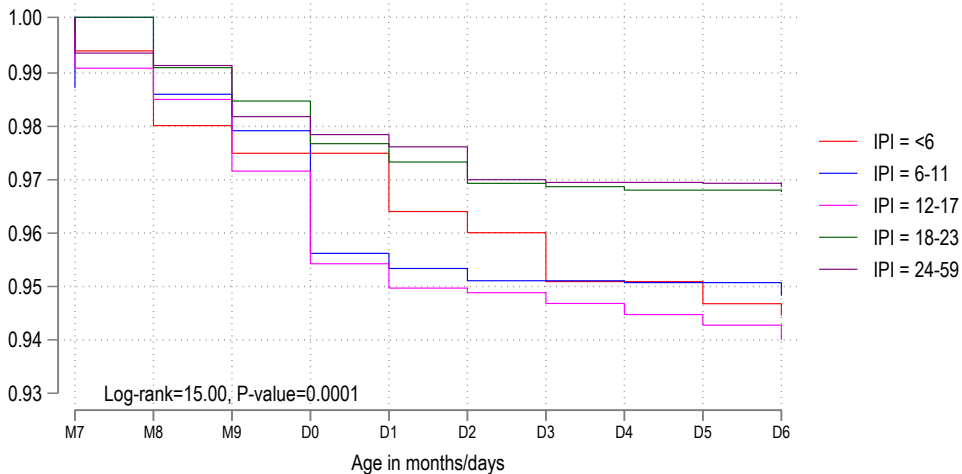

Number at risk

|             |      |      |      |      |      |      |      |      |      |      |
|-------------|------|------|------|------|------|------|------|------|------|------|
| IPI = <6    | 261  | 253  | 243  | 238  | 238  | 235  | 234  | 232  | 232  | 229  |
| IPI = 6-11  | 410  | 402  | 389  | 380  | 371  | 370  | 369  | 369  | 369  | 369  |
| IPI = 12-17 | 819  | 797  | 777  | 752  | 738  | 735  | 734  | 733  | 731  | 730  |
| IPI = 18-23 | 960  | 936  | 912  | 892  | 885  | 882  | 878  | 878  | 877  | 877  |
| IPI = 24-59 | 1661 | 1603 | 1546 | 1508 | 1502 | 1499 | 1489 | 1489 | 1489 | 1488 |

E-Figure 1.13: Ghana (2003)

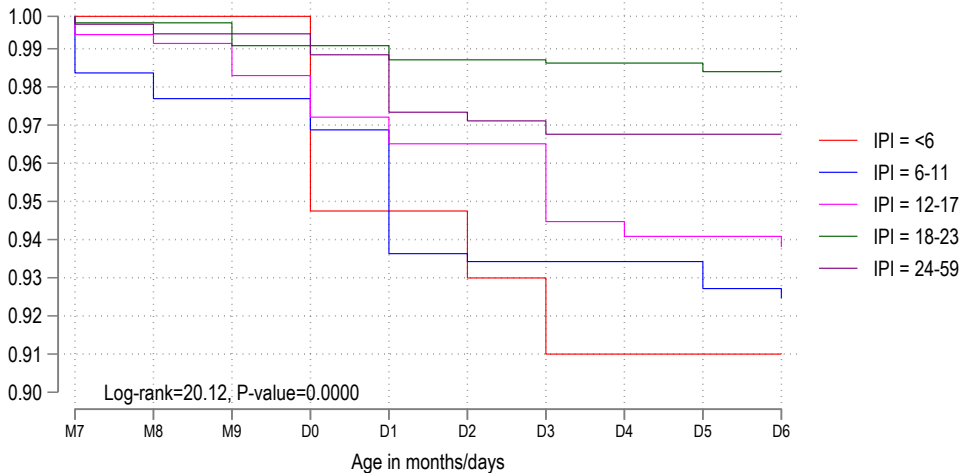

Number at risk

|             |     |     |     |     |     |     |     |     |     |     |
|-------------|-----|-----|-----|-----|-----|-----|-----|-----|-----|-----|
| IPI = <6    | 126 | 122 | 121 | 121 | 115 | 115 | 113 | 111 | 111 | 111 |
| IPI = 6-11  | 157 | 149 | 147 | 145 | 144 | 139 | 138 | 138 | 138 | 137 |
| IPI = 12-17 | 294 | 286 | 280 | 276 | 273 | 271 | 271 | 265 | 264 | 264 |
| IPI = 18-23 | 330 | 329 | 320 | 311 | 311 | 310 | 310 | 310 | 310 | 309 |
| IPI = 24-59 | 606 | 581 | 555 | 539 | 536 | 528 | 527 | 525 | 525 | 525 |

E-Figure 1.14: Ghana (2008)

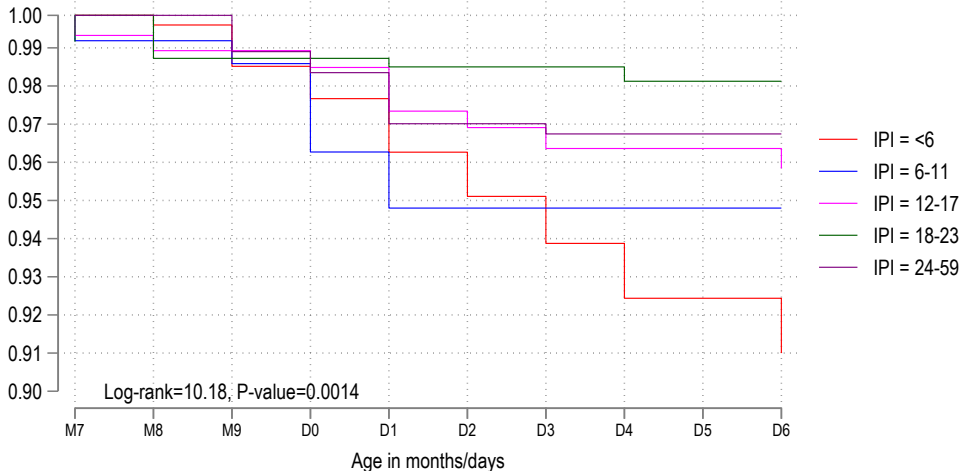

Number at risk

|             |     |     |     |     |     |     |     |     |     |     |
|-------------|-----|-----|-----|-----|-----|-----|-----|-----|-----|-----|
| IPI = <6    | 93  | 92  | 89  | 86  | 85  | 84  | 83  | 82  | 81  | 81  |
| IPI = 6-11  | 140 | 136 | 136 | 135 | 131 | 129 | 129 | 129 | 129 | 129 |
| IPI = 12-17 | 256 | 251 | 245 | 245 | 244 | 241 | 240 | 239 | 239 | 239 |
| IPI = 18-23 | 261 | 250 | 244 | 241 | 241 | 241 | 241 | 241 | 240 | 240 |
| IPI = 24-59 | 481 | 463 | 450 | 440 | 437 | 431 | 431 | 430 | 430 | 430 |



E-Figure 1.15: Ghana (2014)

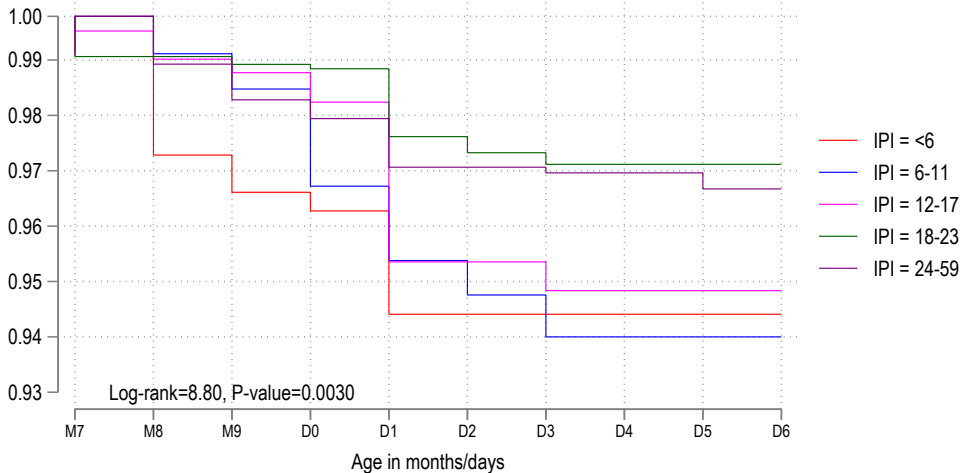

Number at risk

|             |     |     |     |     |     |     |     |     |     |     |
|-------------|-----|-----|-----|-----|-----|-----|-----|-----|-----|-----|
| IPI = <6    | 226 | 219 | 211 | 208 | 208 | 204 | 204 | 204 | 204 | 204 |
| IPI = 6-11  | 353 | 348 | 342 | 339 | 333 | 329 | 327 | 324 | 324 | 324 |
| IPI = 12-17 | 533 | 522 | 505 | 502 | 499 | 484 | 484 | 482 | 482 | 482 |
| IPI = 18-23 | 513 | 499 | 487 | 485 | 485 | 479 | 477 | 476 | 476 | 476 |
| IPI = 24-59 | 850 | 819 | 779 | 771 | 768 | 761 | 761 | 760 | 760 | 758 |

E-Figure 1.16: Guinea (2005)

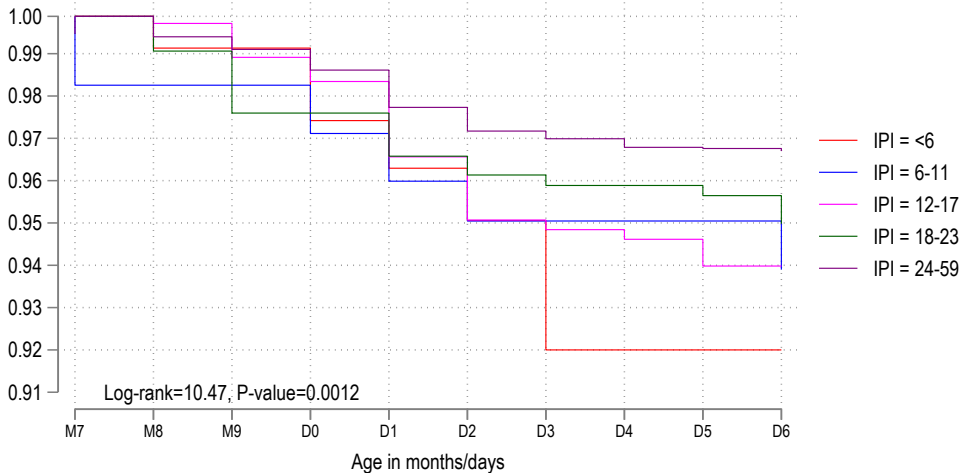

Number at risk

|             | M7   | M8   | M9   | D0   | D1   | D2   | D3   | D4   | D5   | D6   |
|-------------|------|------|------|------|------|------|------|------|------|------|
| IPI = <6    | 105  | 97   | 91   | 88   | 87   | 86   | 85   | 82   | 82   | 82   |
| IPI = 6-11  | 170  | 165  | 162  | 160  | 158  | 156  | 155  | 155  | 155  | 155  |
| IPI = 12-17 | 468  | 460  | 441  | 432  | 430  | 422  | 416  | 415  | 414  | 411  |
| IPI = 18-23 | 470  | 451  | 441  | 427  | 427  | 422  | 420  | 419  | 419  | 418  |
| IPI = 24-59 | 1411 | 1361 | 1286 | 1256 | 1250 | 1239 | 1232 | 1230 | 1227 | 1227 |

E-Figure 1.17: Guinea (2018)

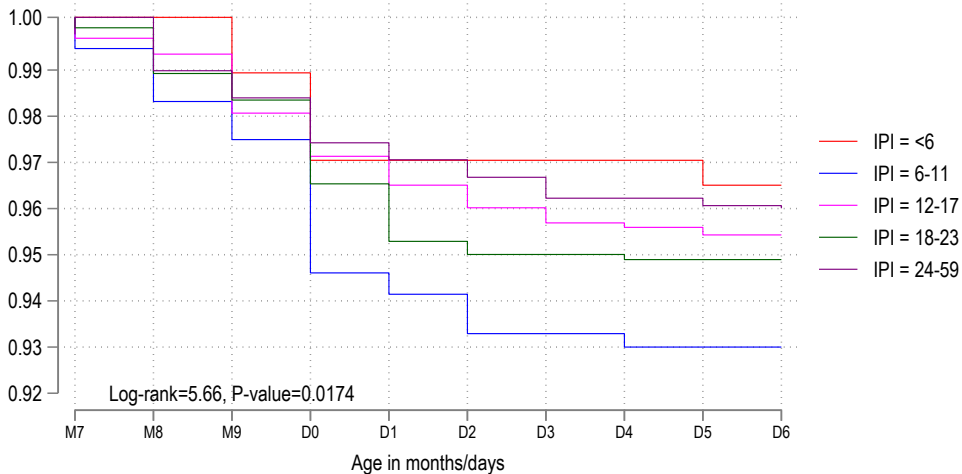

Number at risk

|             |      |      |      |      |      |      |      |      |      |      |
|-------------|------|------|------|------|------|------|------|------|------|------|
| IPI = <6    | 221  | 218  | 216  | 212  | 208  | 208  | 208  | 208  | 208  | 207  |
| IPI = 6-11  | 290  | 282  | 273  | 269  | 261  | 259  | 257  | 257  | 256  | 256  |
| IPI = 12-17 | 866  | 857  | 843  | 828  | 820  | 814  | 810  | 807  | 807  | 805  |
| IPI = 18-23 | 621  | 607  | 588  | 578  | 568  | 560  | 559  | 559  | 558  | 558  |
| IPI = 24-59 | 1461 | 1412 | 1354 | 1310 | 1297 | 1292 | 1287 | 1281 | 1281 | 1279 |

E-Figure 1.18: Kenya (2003)

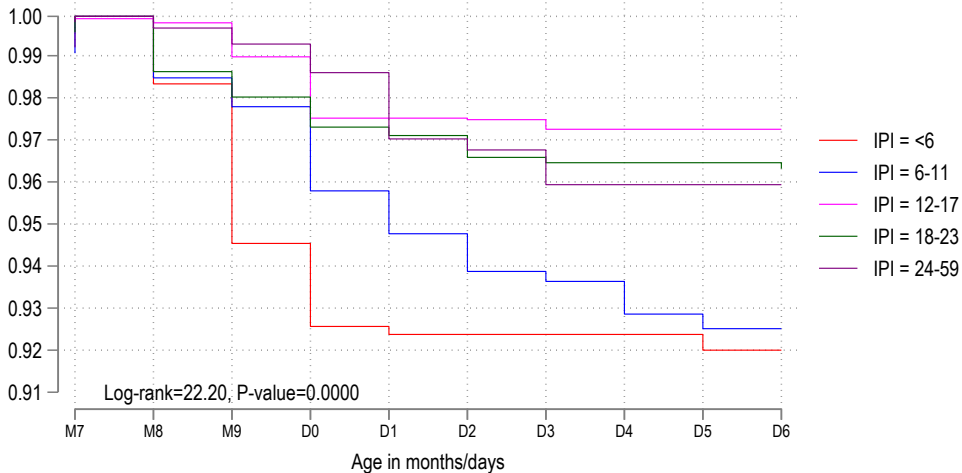

Number at risk

|             |     |     |     |     |     |     |     |     |     |     |
|-------------|-----|-----|-----|-----|-----|-----|-----|-----|-----|-----|
| IPI = <6    | 275 | 272 | 264 | 253 | 247 | 247 | 247 | 247 | 247 | 246 |
| IPI = 6-11  | 463 | 443 | 432 | 426 | 417 | 412 | 409 | 408 | 404 | 403 |
| IPI = 12-17 | 649 | 634 | 620 | 610 | 601 | 601 | 601 | 600 | 600 | 600 |
| IPI = 18-23 | 609 | 596 | 566 | 557 | 553 | 552 | 549 | 549 | 549 | 549 |
| IPI = 24-59 | 659 | 641 | 604 | 591 | 587 | 577 | 576 | 571 | 571 | 571 |

E-Figure 1.19: Kenya (2008/9)

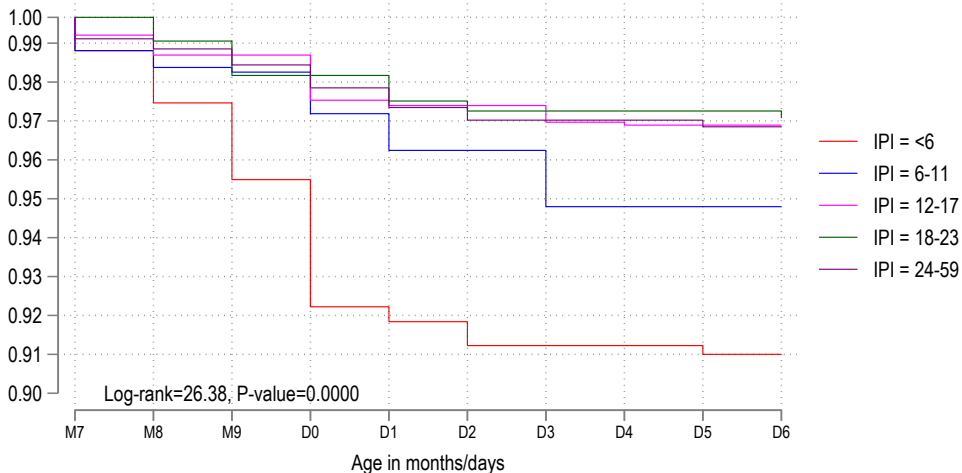

Number at risk

|             |     |     |     |     |     |     |     |     |     |     |
|-------------|-----|-----|-----|-----|-----|-----|-----|-----|-----|-----|
| IPI = <6    | 276 | 268 | 261 | 255 | 247 | 246 | 244 | 244 | 244 | 243 |
| IPI = 6-11  | 455 | 446 | 440 | 440 | 435 | 431 | 431 | 424 | 424 | 424 |
| IPI = 12-17 | 695 | 681 | 663 | 661 | 653 | 652 | 652 | 649 | 649 | 649 |
| IPI = 18-23 | 569 | 565 | 542 | 534 | 534 | 530 | 529 | 529 | 529 | 529 |
| IPI = 24-59 | 872 | 851 | 822 | 813 | 808 | 804 | 801 | 801 | 801 | 800 |

E-Figure 1.20: Kenya (2014)

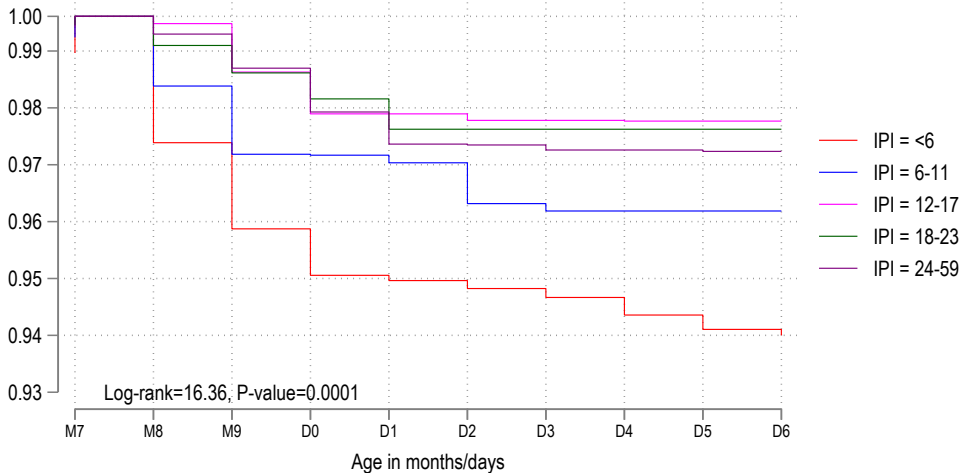

Number at risk

|             | M7   | M8   | M9  | D0  | D1  | D2  | D3  | D4  | D5  | D6  |
|-------------|------|------|-----|-----|-----|-----|-----|-----|-----|-----|
| IPI = <6    | 333  | 322  | 312 | 302 | 299 | 299 | 298 | 298 | 297 | 296 |
| IPI = 6-11  | 518  | 505  | 494 | 485 | 485 | 484 | 481 | 480 | 480 | 480 |
| IPI = 12-17 | 848  | 830  | 813 | 805 | 799 | 799 | 798 | 798 | 798 | 798 |
| IPI = 18-23 | 747  | 733  | 714 | 711 | 708 | 704 | 704 | 704 | 704 | 704 |
| IPI = 24-59 | 1056 | 1008 | 956 | 943 | 935 | 930 | 930 | 929 | 929 | 929 |

E-Figure 1.21: Kenya (2022)

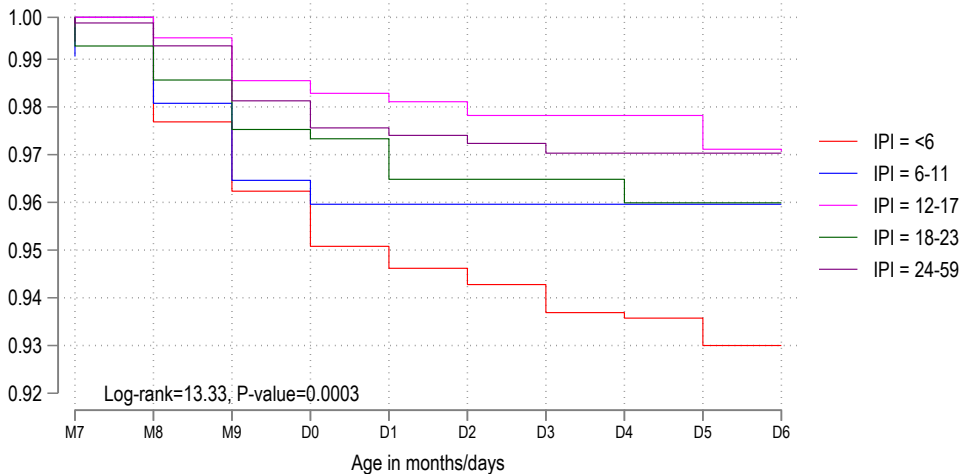

Number at risk

|             |     |     |     |     |     |     |     |     |     |     |
|-------------|-----|-----|-----|-----|-----|-----|-----|-----|-----|-----|
| IPI = <6    | 372 | 367 | 355 | 348 | 344 | 343 | 341 | 339 | 339 | 337 |
| IPI = 6-11  | 479 | 468 | 457 | 447 | 444 | 444 | 444 | 444 | 444 | 444 |
| IPI = 12-17 | 599 | 584 | 577 | 566 | 564 | 563 | 562 | 562 | 562 | 558 |
| IPI = 18-23 | 493 | 483 | 470 | 459 | 458 | 454 | 454 | 454 | 452 | 452 |
| IPI = 24-59 | 854 | 809 | 743 | 723 | 719 | 718 | 716 | 715 | 715 | 715 |

E-Figure 1.22: Lesotho (2009/10)

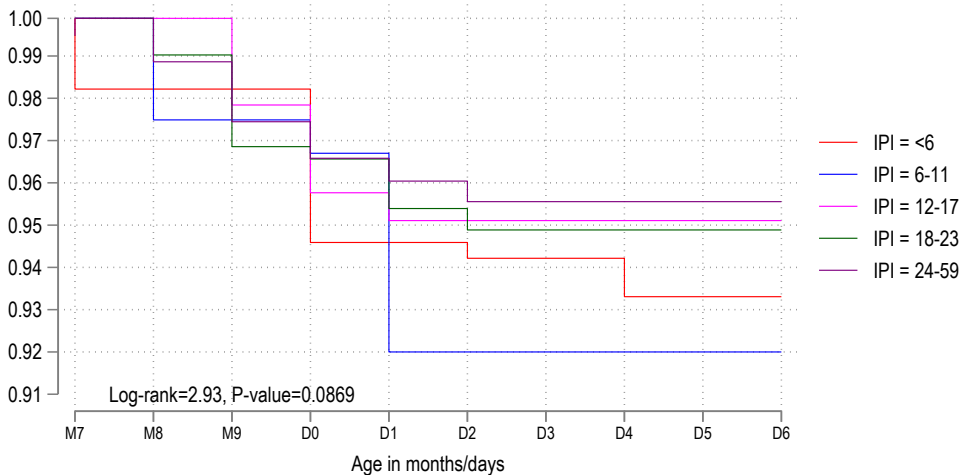

Number at risk

|             |     |     |     |     |     |     |     |     |     |     |
|-------------|-----|-----|-----|-----|-----|-----|-----|-----|-----|-----|
| IPI = <6    | 99  | 96  | 96  | 95  | 92  | 92  | 91  | 91  | 90  | 90  |
| IPI = 6-11  | 120 | 120 | 116 | 114 | 113 | 108 | 108 | 108 | 108 | 108 |
| IPI = 12-17 | 224 | 220 | 217 | 211 | 207 | 205 | 205 | 205 | 205 | 205 |
| IPI = 18-23 | 186 | 183 | 181 | 176 | 175 | 173 | 172 | 172 | 172 | 172 |
| IPI = 24-59 | 535 | 515 | 498 | 487 | 483 | 480 | 478 | 478 | 478 | 477 |



E-Figure 1.23: Liberia (2013)

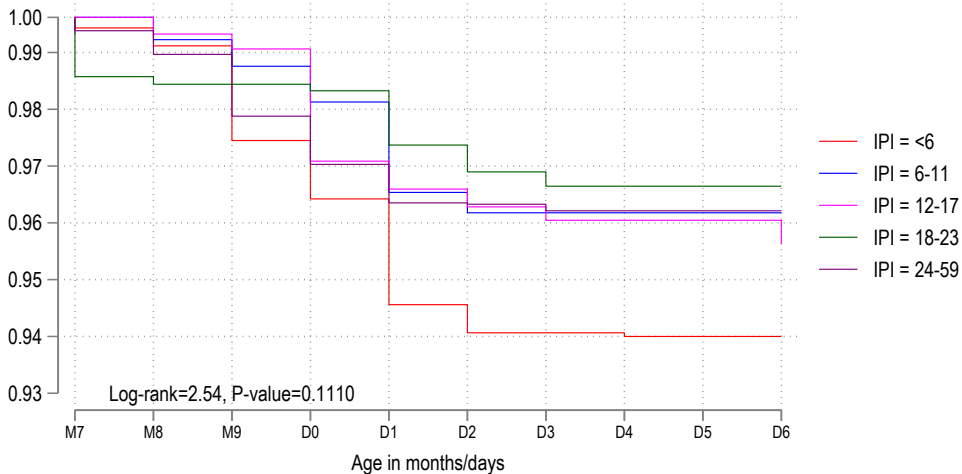

Number at risk

|             |     |     |     |     |     |     |     |     |     |     |
|-------------|-----|-----|-----|-----|-----|-----|-----|-----|-----|-----|
| IPI = <6    | 165 | 161 | 158 | 150 | 148 | 146 | 145 | 145 | 145 | 145 |
| IPI = 6-11  | 310 | 302 | 293 | 291 | 289 | 284 | 283 | 283 | 283 | 283 |
| IPI = 12-17 | 508 | 498 | 483 | 479 | 469 | 467 | 465 | 464 | 464 | 464 |
| IPI = 18-23 | 482 | 468 | 457 | 446 | 446 | 441 | 439 | 438 | 438 | 438 |
| IPI = 24-59 | 852 | 817 | 757 | 716 | 709 | 705 | 704 | 704 | 704 | 704 |

E-Figure 1.24: Liberia (2019/20)

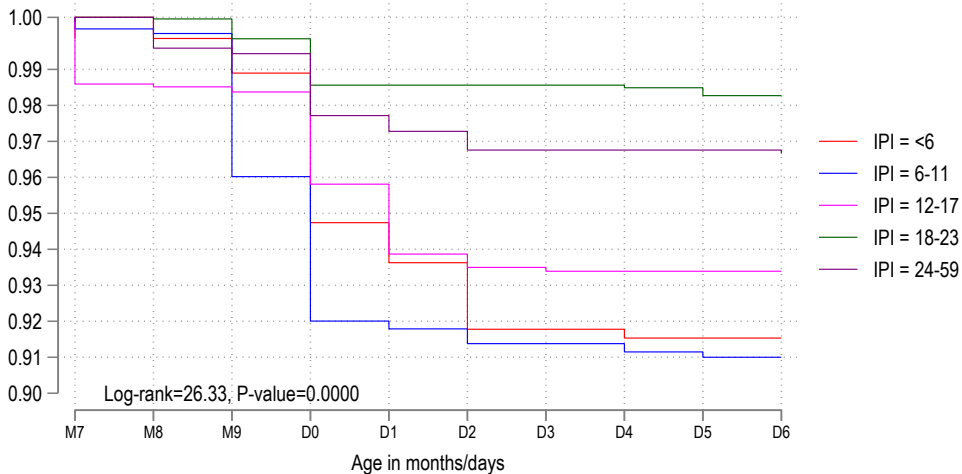

Number at risk

|             |     |     |     |     |     |     |     |     |     |     |
|-------------|-----|-----|-----|-----|-----|-----|-----|-----|-----|-----|
| IPI = <6    | 152 | 140 | 138 | 136 | 130 | 129 | 126 | 126 | 126 | 126 |
| IPI = 6-11  | 233 | 230 | 229 | 216 | 207 | 206 | 205 | 205 | 205 | 204 |
| IPI = 12-17 | 402 | 392 | 387 | 383 | 373 | 365 | 364 | 363 | 363 | 363 |
| IPI = 18-23 | 426 | 422 | 412 | 401 | 395 | 395 | 395 | 395 | 395 | 394 |
| IPI = 24-59 | 832 | 802 | 781 | 757 | 744 | 740 | 736 | 736 | 736 | 736 |

E-Figure 1.25: Madagascar (2003/4)

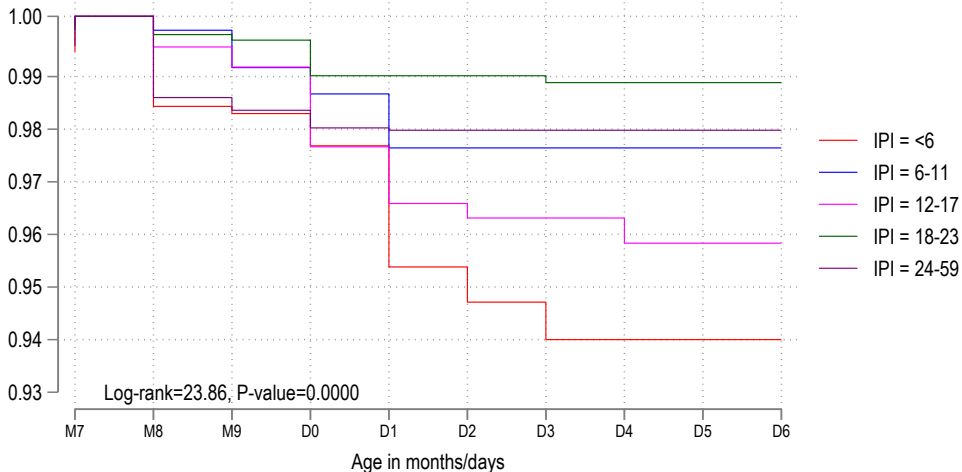

Number at risk

|             |      |      |     |     |     |     |     |     |     |     |
|-------------|------|------|-----|-----|-----|-----|-----|-----|-----|-----|
| IPI = <6    | 363  | 353  | 346 | 345 | 343 | 335 | 333 | 330 | 330 | 330 |
| IPI = 6-11  | 509  | 496  | 486 | 478 | 476 | 471 | 471 | 471 | 471 | 471 |
| IPI = 12-17 | 847  | 815  | 792 | 781 | 769 | 761 | 758 | 758 | 755 | 755 |
| IPI = 18-23 | 566  | 555  | 540 | 531 | 527 | 527 | 527 | 526 | 526 | 526 |
| IPI = 24-59 | 1034 | 1001 | 967 | 940 | 937 | 937 | 937 | 937 | 937 | 937 |

E-Figure 1.26: Madagascar (2008/9)

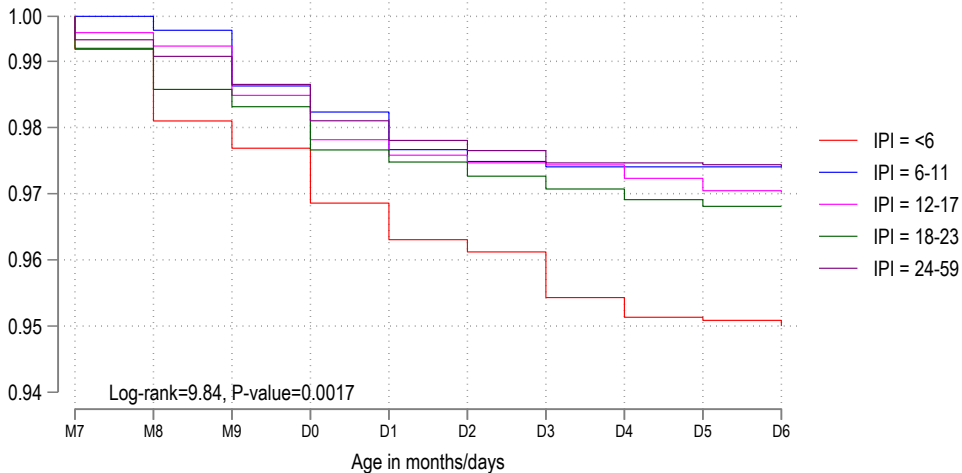

Number at risk

|             |      |      |      |      |      |      |      |      |      |      |
|-------------|------|------|------|------|------|------|------|------|------|------|
| IPI = <6    | 537  | 526  | 513  | 507  | 502  | 500  | 499  | 495  | 493  | 492  |
| IPI = 6-11  | 1025 | 1015 | 997  | 984  | 981  | 975  | 973  | 972  | 972  | 972  |
| IPI = 12-17 | 1619 | 1588 | 1550 | 1532 | 1521 | 1518 | 1516 | 1515 | 1512 | 1509 |
| IPI = 18-23 | 1351 | 1315 | 1275 | 1264 | 1255 | 1253 | 1250 | 1248 | 1246 | 1244 |
| IPI = 24-59 | 1858 | 1792 | 1722 | 1704 | 1694 | 1689 | 1686 | 1683 | 1683 | 1683 |

E-Figure 1.27: Madagascar (2021)

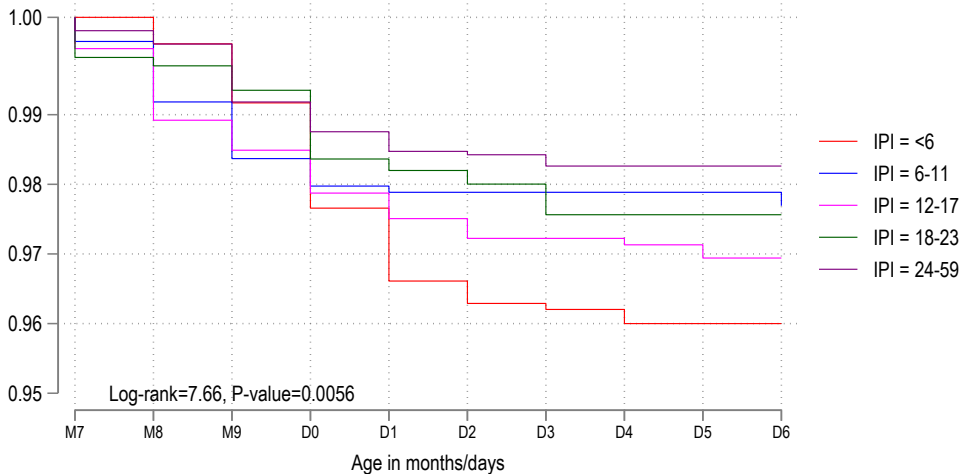

Number at risk

|             |      |      |      |      |      |      |      |      |      |      |
|-------------|------|------|------|------|------|------|------|------|------|------|
| IPI = <6    | 551  | 544  | 530  | 523  | 515  | 509  | 508  | 507  | 506  | 506  |
| IPI = 6-11  | 783  | 774  | 750  | 741  | 738  | 738  | 738  | 738  | 738  | 738  |
| IPI = 12-17 | 961  | 946  | 915  | 906  | 900  | 897  | 894  | 894  | 893  | 892  |
| IPI = 18-23 | 716  | 701  | 674  | 665  | 658  | 657  | 656  | 653  | 653  | 653  |
| IPI = 24-59 | 1309 | 1263 | 1197 | 1174 | 1169 | 1166 | 1165 | 1164 | 1164 | 1164 |

E-Figure 1.28: Malawi (2000)

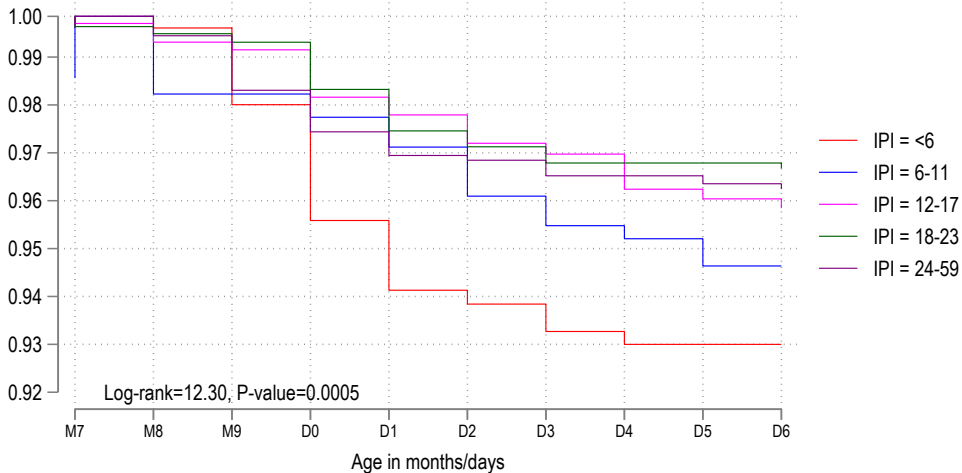

Number at risk

|             |      |      |      |      |      |      |      |      |      |      |
|-------------|------|------|------|------|------|------|------|------|------|------|
| IPI = <6    | 338  | 326  | 316  | 310  | 302  | 297  | 297  | 295  | 294  | 294  |
| IPI = 6-11  | 692  | 667  | 652  | 651  | 648  | 643  | 637  | 633  | 631  | 627  |
| IPI = 12-17 | 1363 | 1330 | 1293 | 1278 | 1265 | 1260 | 1252 | 1250 | 1240 | 1238 |
| IPI = 18-23 | 1290 | 1238 | 1200 | 1176 | 1165 | 1155 | 1151 | 1147 | 1147 | 1147 |
| IPI = 24-59 | 1997 | 1897 | 1818 | 1771 | 1755 | 1746 | 1745 | 1739 | 1739 | 1736 |

E-Figure 1.29: Malawi (2004/5)

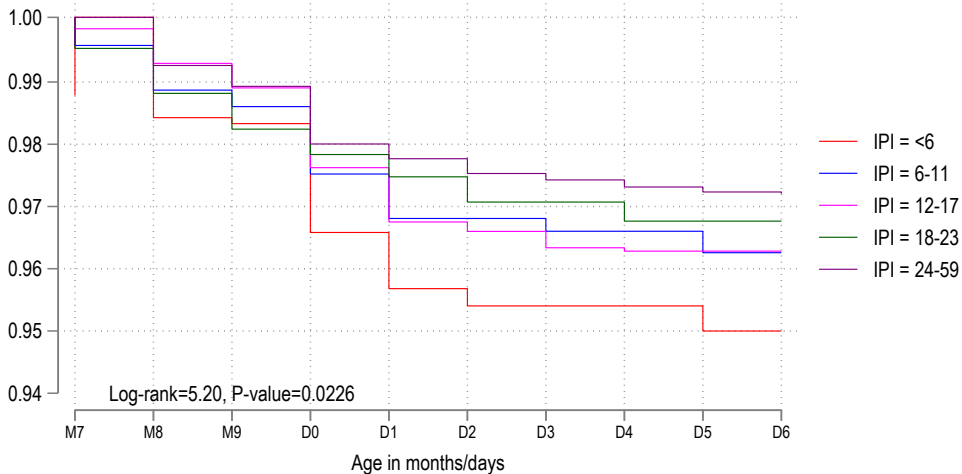

Number at risk

|             |      |      |      |      |      |      |      |      |      |      |
|-------------|------|------|------|------|------|------|------|------|------|------|
| IPI = <6    | 310  | 302  | 294  | 293  | 288  | 285  | 284  | 284  | 284  | 283  |
| IPI = 6-11  | 538  | 524  | 509  | 503  | 497  | 494  | 494  | 493  | 493  | 491  |
| IPI = 12-17 | 1035 | 1017 | 993  | 976  | 964  | 955  | 954  | 951  | 950  | 949  |
| IPI = 18-23 | 1089 | 1057 | 1019 | 1004 | 999  | 996  | 992  | 992  | 989  | 989  |
| IPI = 24-59 | 2242 | 2152 | 2054 | 2023 | 2004 | 1999 | 1994 | 1992 | 1990 | 1988 |

E-Figure 1.30: Malawi (2010)

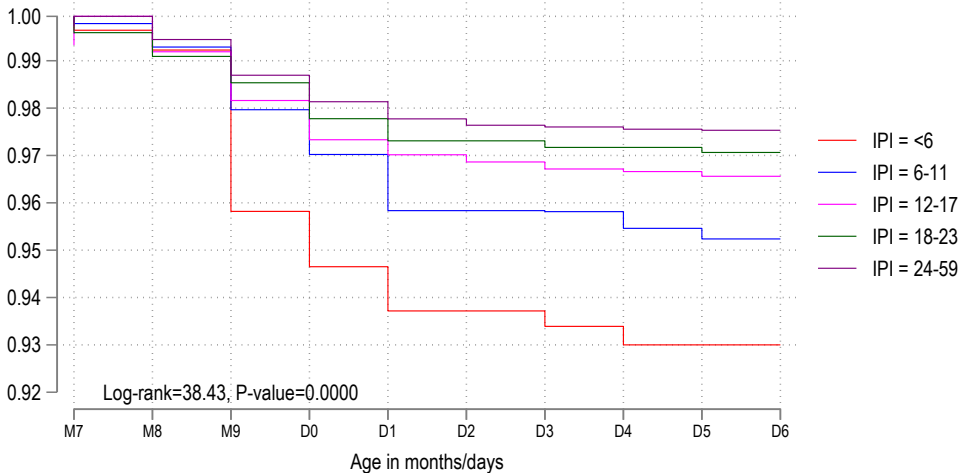

Number at risk

|             |      |      |      |      |      |      |      |      |      |      |
|-------------|------|------|------|------|------|------|------|------|------|------|
| IPI = <6    | 599  | 590  | 578  | 554  | 548  | 542  | 542  | 540  | 538  | 538  |
| IPI = 6-11  | 949  | 935  | 920  | 903  | 894  | 883  | 883  | 883  | 880  | 878  |
| IPI = 12-17 | 1823 | 1787 | 1758 | 1730 | 1715 | 1710 | 1707 | 1704 | 1703 | 1700 |
| IPI = 18-23 | 1785 | 1727 | 1677 | 1659 | 1646 | 1638 | 1638 | 1636 | 1636 | 1634 |
| IPI = 24-59 | 3299 | 3170 | 3065 | 3008 | 2991 | 2980 | 2976 | 2975 | 2973 | 2973 |



E-Figure 1.31: Malawi (2015/16)

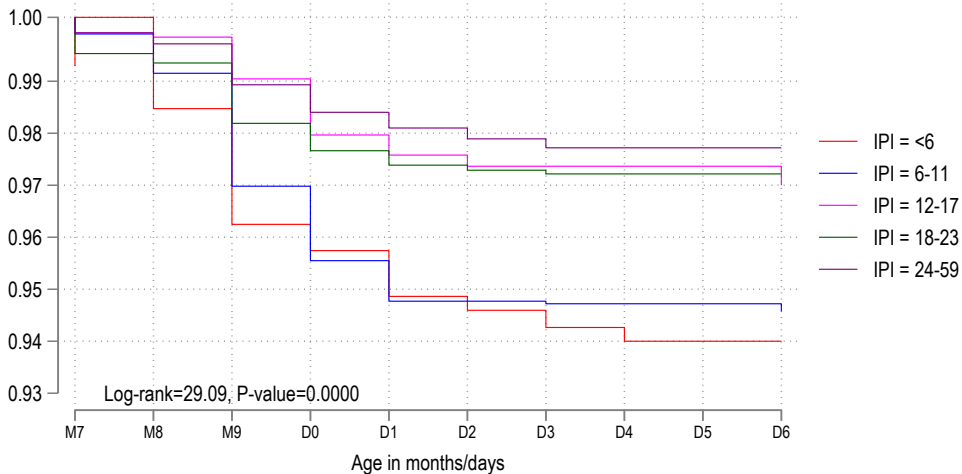

Number at risk

|             |      |      |      |      |      |      |      |      |      |      |
|-------------|------|------|------|------|------|------|------|------|------|------|
| IPI = <6    | 450  | 437  | 428  | 412  | 409  | 406  | 404  | 403  | 402  | 402  |
| IPI = 6-11  | 616  | 608  | 594  | 576  | 568  | 563  | 563  | 563  | 563  | 563  |
| IPI = 12-17 | 949  | 937  | 921  | 903  | 893  | 890  | 888  | 888  | 888  | 888  |
| IPI = 18-23 | 1195 | 1171 | 1146 | 1120 | 1114 | 1111 | 1110 | 1109 | 1109 | 1109 |
| IPI = 24-59 | 3276 | 3159 | 3038 | 2970 | 2955 | 2945 | 2939 | 2934 | 2934 | 2934 |

E-Figure 1.32: Mali (2001)

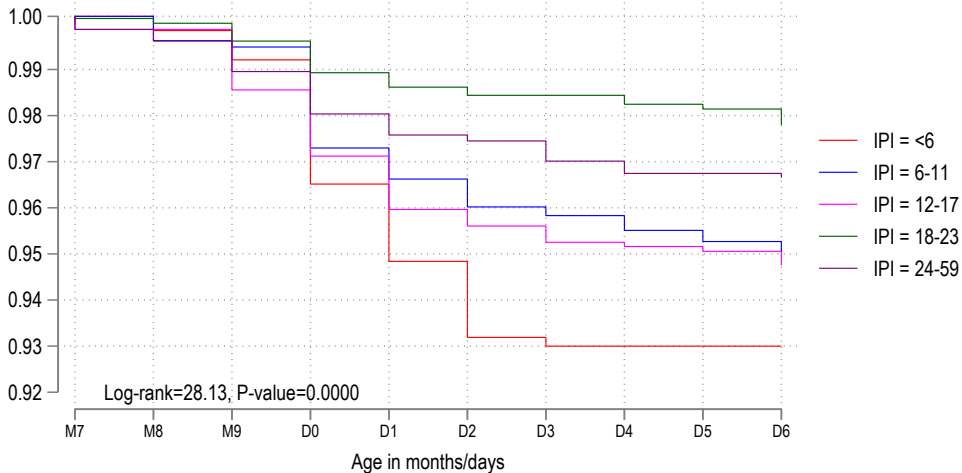

Number at risk

|             |      |      |      |      |      |      |      |      |      |      |
|-------------|------|------|------|------|------|------|------|------|------|------|
| IPI = <6    | 499  | 486  | 477  | 468  | 455  | 447  | 439  | 439  | 439  | 439  |
| IPI = 6-11  | 737  | 719  | 698  | 690  | 675  | 670  | 666  | 665  | 663  | 661  |
| IPI = 12-17 | 1454 | 1424 | 1400 | 1369 | 1349 | 1333 | 1328 | 1323 | 1322 | 1321 |
| IPI = 18-23 | 1241 | 1206 | 1166 | 1148 | 1140 | 1136 | 1134 | 1134 | 1132 | 1131 |
| IPI = 24-59 | 2136 | 2028 | 1903 | 1852 | 1835 | 1826 | 1824 | 1816 | 1811 | 1811 |

E-Figure 1.33: Mali (2006)

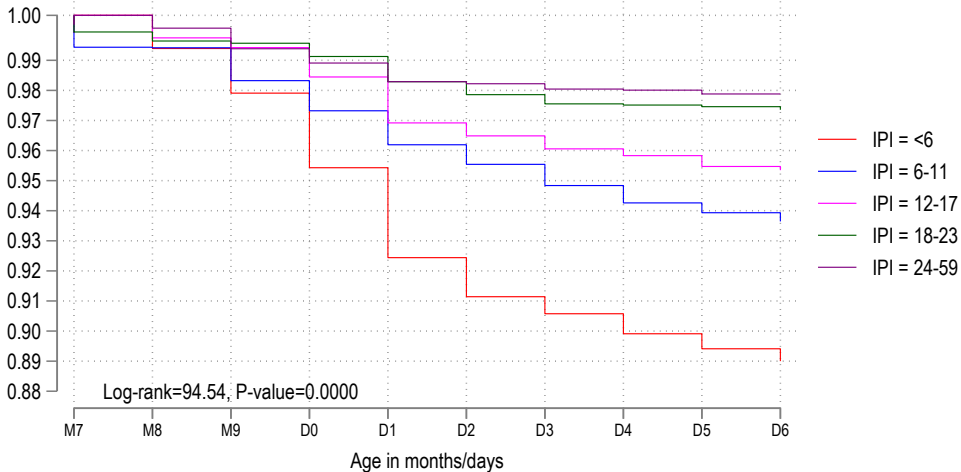

Number at risk

|             |      |      |      |      |      |      |      |      |      |      |
|-------------|------|------|------|------|------|------|------|------|------|------|
| IPI = <6    | 578  | 560  | 533  | 518  | 505  | 489  | 482  | 479  | 475  | 473  |
| IPI = 6-11  | 986  | 956  | 938  | 916  | 907  | 896  | 890  | 883  | 878  | 875  |
| IPI = 12-17 | 1997 | 1958 | 1910 | 1882 | 1864 | 1835 | 1826 | 1818 | 1814 | 1807 |
| IPI = 18-23 | 1633 | 1584 | 1537 | 1516 | 1509 | 1496 | 1490 | 1485 | 1484 | 1483 |
| IPI = 24-59 | 2240 | 2149 | 2056 | 1996 | 1986 | 1974 | 1972 | 1969 | 1968 | 1965 |

E-Figure 1.34: Mali (2012/13)

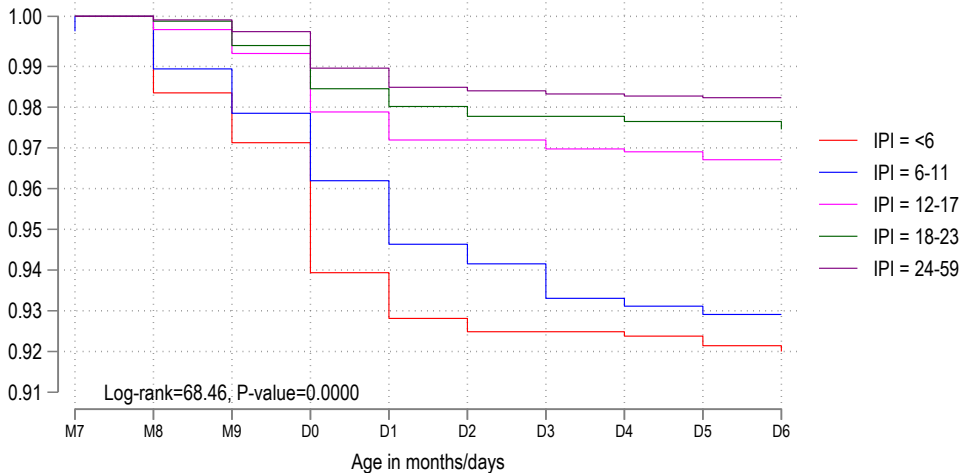

Number at risk

|             |      |      |      |      |      |      |      |      |      |      |
|-------------|------|------|------|------|------|------|------|------|------|------|
| IPI = <6    | 428  | 424  | 415  | 407  | 393  | 388  | 387  | 387  | 387  | 386  |
| IPI = 6-11  | 692  | 679  | 660  | 646  | 635  | 624  | 621  | 616  | 614  | 613  |
| IPI = 12-17 | 1247 | 1234 | 1208 | 1193 | 1176 | 1168 | 1168 | 1165 | 1164 | 1162 |
| IPI = 18-23 | 1151 | 1134 | 1105 | 1093 | 1082 | 1077 | 1074 | 1074 | 1073 | 1073 |
| IPI = 24-59 | 1991 | 1920 | 1860 | 1827 | 1811 | 1802 | 1800 | 1799 | 1798 | 1797 |

E-Figure 1.35: Mali (2018)

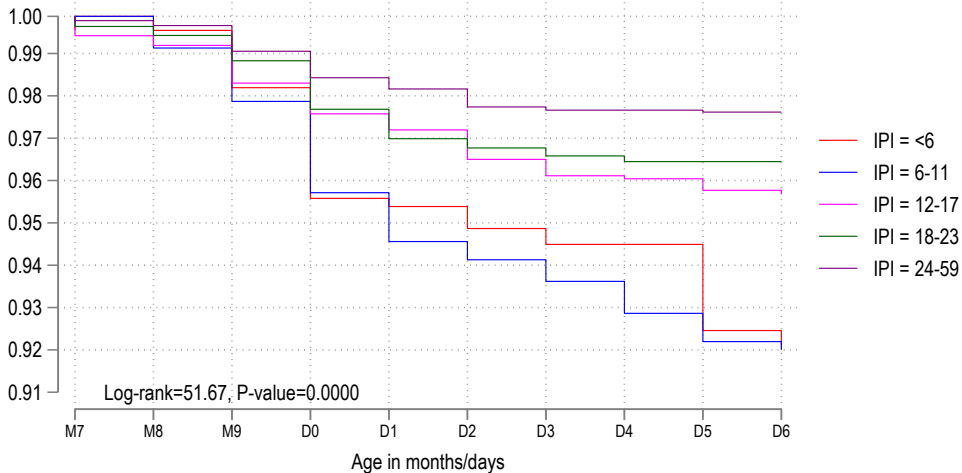

Number at risk

|             |      |      |      |      |      |      |      |      |      |      |
|-------------|------|------|------|------|------|------|------|------|------|------|
| IPI = <6    | 385  | 380  | 372  | 367  | 357  | 357  | 355  | 353  | 353  | 345  |
| IPI = 6-11  | 713  | 706  | 686  | 672  | 658  | 650  | 647  | 643  | 638  | 633  |
| IPI = 12-17 | 1321 | 1294 | 1262 | 1245 | 1236 | 1231 | 1222 | 1217 | 1216 | 1213 |
| IPI = 18-23 | 1165 | 1129 | 1100 | 1084 | 1072 | 1064 | 1062 | 1060 | 1058 | 1058 |
| IPI = 24-59 | 1734 | 1688 | 1613 | 1581 | 1571 | 1567 | 1560 | 1559 | 1559 | 1558 |

E-Figure 1.36: Mozambique (2003/4)

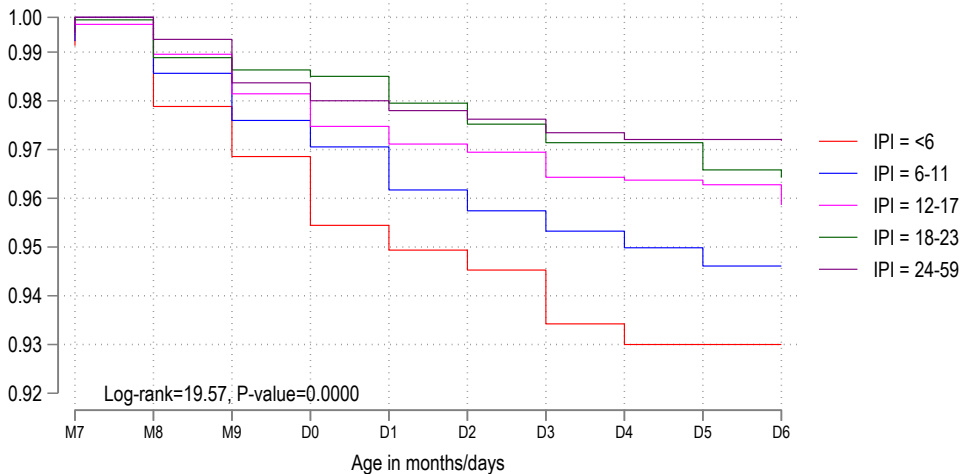

Number at risk

|             |      |      |      |      |      |      |      |      |      |      |
|-------------|------|------|------|------|------|------|------|------|------|------|
| IPI = <6    | 316  | 310  | 301  | 295  | 290  | 289  | 288  | 284  | 283  | 283  |
| IPI = 6-11  | 630  | 619  | 604  | 595  | 592  | 586  | 584  | 581  | 579  | 577  |
| IPI = 12-17 | 1081 | 1073 | 1051 | 1028 | 1021 | 1017 | 1015 | 1010 | 1009 | 1008 |
| IPI = 18-23 | 1283 | 1258 | 1211 | 1190 | 1189 | 1182 | 1177 | 1172 | 1172 | 1166 |
| IPI = 24-59 | 1971 | 1916 | 1852 | 1810 | 1803 | 1799 | 1796 | 1791 | 1788 | 1787 |

E-Figure 1.37: Mozambique (2011)

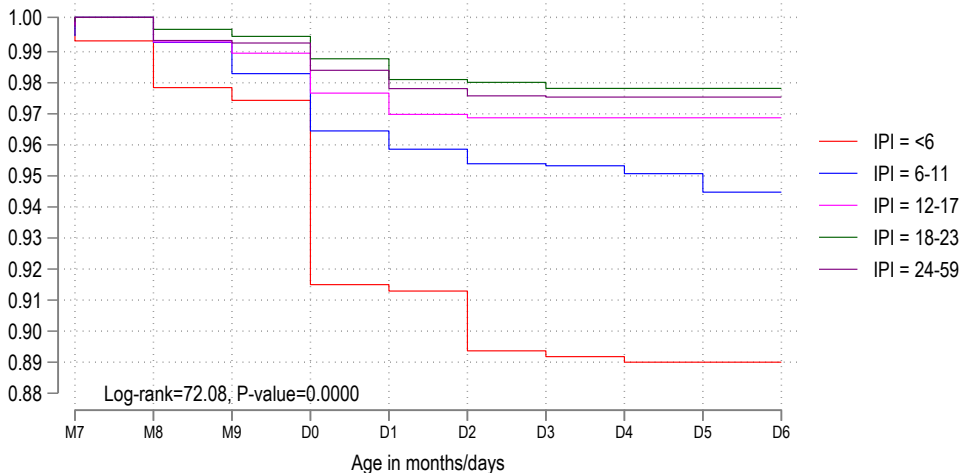

Number at risk

|             |      |      |      |      |      |      |      |      |      |      |
|-------------|------|------|------|------|------|------|------|------|------|------|
| IPI = <6    | 315  | 310  | 299  | 297  | 279  | 278  | 272  | 271  | 271  | 271  |
| IPI = 6-11  | 545  | 531  | 523  | 515  | 505  | 502  | 500  | 499  | 498  | 495  |
| IPI = 12-17 | 1191 | 1159 | 1134 | 1110 | 1096 | 1088 | 1087 | 1087 | 1087 | 1087 |
| IPI = 18-23 | 1378 | 1336 | 1294 | 1273 | 1264 | 1255 | 1254 | 1252 | 1252 | 1250 |
| IPI = 24-59 | 2021 | 1946 | 1856 | 1822 | 1806 | 1795 | 1791 | 1790 | 1790 | 1790 |

E-Figure 1.38: Namibia (2006/7)

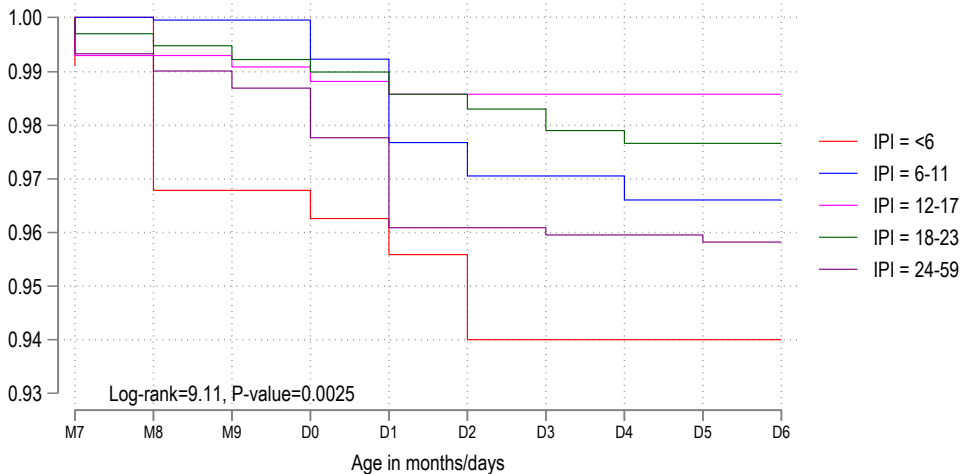

Number at risk

|             |     |     |     |     |     |     |     |     |     |     |
|-------------|-----|-----|-----|-----|-----|-----|-----|-----|-----|-----|
| IPI = <6    | 132 | 127 | 123 | 122 | 122 | 121 | 119 | 119 | 119 | 119 |
| IPI = 6-11  | 189 | 187 | 182 | 182 | 181 | 178 | 177 | 177 | 176 | 176 |
| IPI = 12-17 | 335 | 328 | 323 | 318 | 318 | 317 | 317 | 317 | 317 | 317 |
| IPI = 18-23 | 362 | 351 | 345 | 340 | 340 | 338 | 337 | 336 | 335 | 335 |
| IPI = 24-59 | 735 | 702 | 674 | 664 | 657 | 646 | 646 | 645 | 645 | 644 |



E-Figure 1.39: Niger (2006)

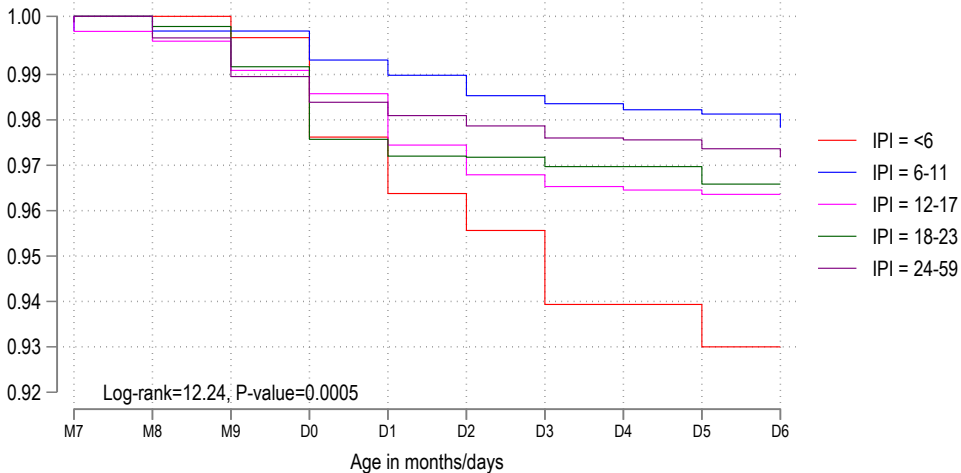

Number at risk

|             |      |      |      |      |      |      |      |      |      |      |
|-------------|------|------|------|------|------|------|------|------|------|------|
| IPI = <6    | 268  | 258  | 251  | 245  | 240  | 237  | 235  | 231  | 231  | 228  |
| IPI = 6-11  | 518  | 512  | 498  | 493  | 490  | 488  | 486  | 485  | 485  | 484  |
| IPI = 12-17 | 1164 | 1133 | 1109 | 1086 | 1080 | 1068 | 1061 | 1058 | 1057 | 1056 |
| IPI = 18-23 | 1033 | 1005 | 967  | 935  | 920  | 916  | 916  | 914  | 914  | 911  |
| IPI = 24-59 | 1519 | 1442 | 1367 | 1323 | 1315 | 1311 | 1308 | 1305 | 1304 | 1302 |

E-Figure 1.40: Niger (2012)

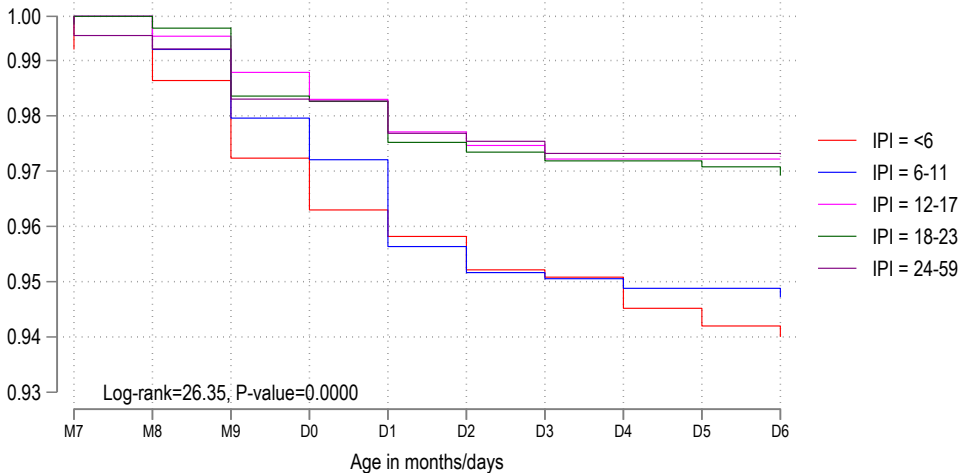

Number at risk

|             |      |      |      |      |      |      |      |      |      |      |
|-------------|------|------|------|------|------|------|------|------|------|------|
| IPI = <6    | 555  | 543  | 532  | 523  | 518  | 515  | 512  | 512  | 509  | 507  |
| IPI = 6-11  | 850  | 837  | 814  | 804  | 797  | 785  | 781  | 780  | 778  | 778  |
| IPI = 12-17 | 1876 | 1845 | 1801 | 1784 | 1775 | 1764 | 1760 | 1755 | 1755 | 1755 |
| IPI = 18-23 | 1666 | 1604 | 1538 | 1503 | 1502 | 1491 | 1488 | 1486 | 1486 | 1484 |
| IPI = 24-59 | 1904 | 1788 | 1684 | 1650 | 1649 | 1640 | 1637 | 1633 | 1633 | 1633 |

E-Figure 1.41: Nigeria (2008)

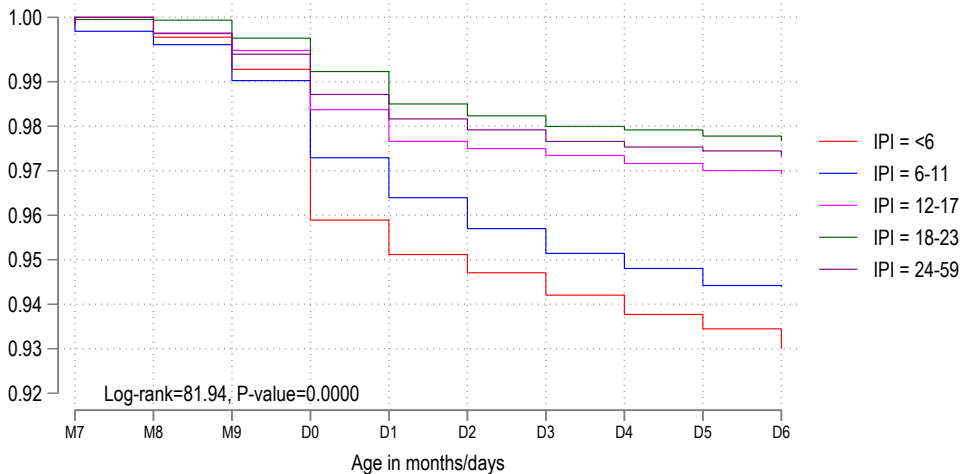

Number at risk

|             |      |      |      |      |      |      |      |      |      |      |
|-------------|------|------|------|------|------|------|------|------|------|------|
| IPI = <6    | 1243 | 1219 | 1187 | 1172 | 1132 | 1123 | 1118 | 1112 | 1107 | 1103 |
| IPI = 6-11  | 2082 | 2043 | 2007 | 1981 | 1946 | 1928 | 1914 | 1903 | 1896 | 1888 |
| IPI = 12-17 | 3889 | 3817 | 3739 | 3676 | 3627 | 3601 | 3595 | 3589 | 3582 | 3576 |
| IPI = 18-23 | 3175 | 3086 | 2996 | 2951 | 2929 | 2907 | 2899 | 2892 | 2890 | 2886 |
| IPI = 24-59 | 4386 | 4200 | 4035 | 3954 | 3918 | 3896 | 3887 | 3876 | 3871 | 3868 |

E-Figure 1.42: Nigeria (2013)

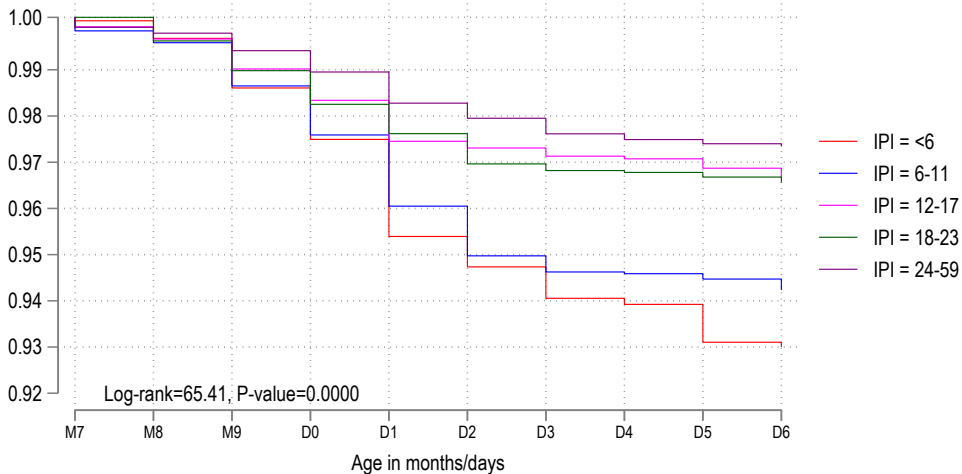

Number at risk

|             |      |      |      |      |      |      |      |      |      |      |
|-------------|------|------|------|------|------|------|------|------|------|------|
| IPI = <6    | 1089 | 1054 | 1022 | 998  | 986  | 965  | 959  | 952  | 950  | 942  |
| IPI = 6-11  | 2042 | 1999 | 1939 | 1906 | 1885 | 1855 | 1835 | 1828 | 1827 | 1825 |
| IPI = 12-17 | 4315 | 4197 | 4062 | 4005 | 3977 | 3942 | 3936 | 3928 | 3926 | 3918 |
| IPI = 18-23 | 3169 | 3058 | 2925 | 2871 | 2850 | 2832 | 2813 | 2808 | 2807 | 2804 |
| IPI = 24-59 | 4781 | 4532 | 4246 | 4164 | 4145 | 4117 | 4103 | 4089 | 4084 | 4080 |

E-Figure 1.43: Nigeria (2018)

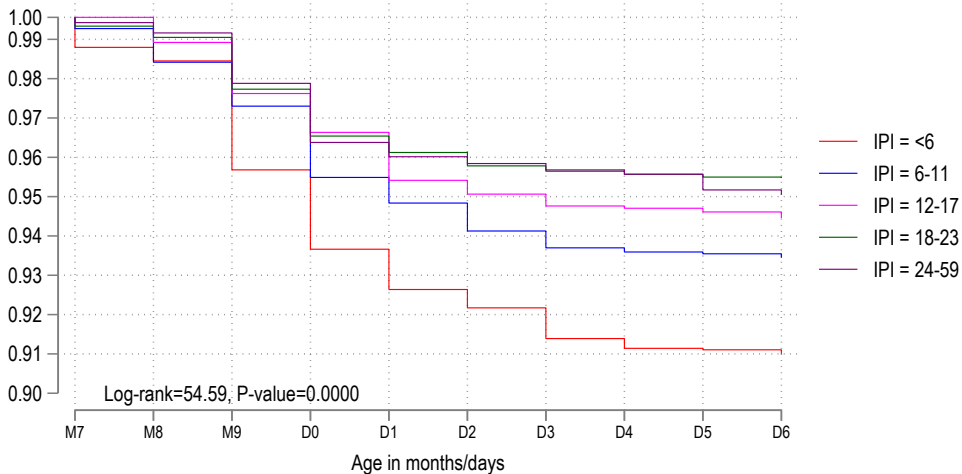

Number at risk

|             |      |      |      |      |      |      |      |      |      |      |
|-------------|------|------|------|------|------|------|------|------|------|------|
| IPI = <6    | 1527 | 1490 | 1465 | 1406 | 1376 | 1361 | 1354 | 1343 | 1339 | 1338 |
| IPI = 6-11  | 2532 | 2483 | 2414 | 2362 | 2318 | 2303 | 2286 | 2275 | 2273 | 2271 |
| IPI = 12-17 | 4819 | 4734 | 4636 | 4533 | 4488 | 4431 | 4415 | 4401 | 4398 | 4394 |
| IPI = 18-23 | 4120 | 3987 | 3849 | 3755 | 3710 | 3694 | 3681 | 3676 | 3673 | 3670 |
| IPI = 24-59 | 5784 | 5562 | 5334 | 5163 | 5084 | 5065 | 5056 | 5047 | 5041 | 5019 |

E-Figure 1.44: Rwanda (2000)

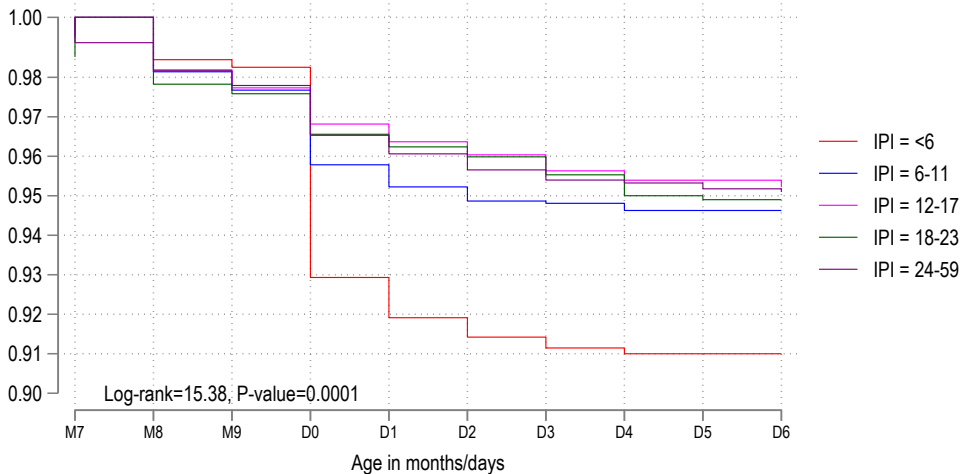

Number at risk

|             |      |      |      |      |      |      |      |      |      |      |
|-------------|------|------|------|------|------|------|------|------|------|------|
| IPI = <6    | 560  | 551  | 526  | 524  | 496  | 490  | 488  | 486  | 485  | 485  |
| IPI = 6-11  | 628  | 613  | 589  | 583  | 572  | 569  | 567  | 566  | 565  | 565  |
| IPI = 12-17 | 1016 | 996  | 974  | 962  | 953  | 949  | 945  | 941  | 939  | 939  |
| IPI = 18-23 | 834  | 799  | 770  | 759  | 751  | 749  | 747  | 744  | 739  | 739  |
| IPI = 24-59 | 1365 | 1312 | 1248 | 1229 | 1213 | 1207 | 1202 | 1199 | 1198 | 1196 |

E-Figure 1.45: Rwanda (2005)

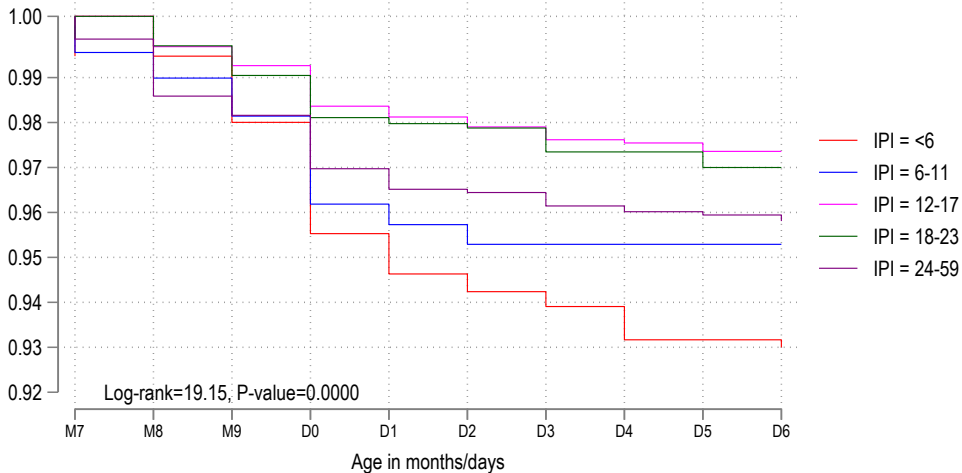

Number at risk

|             |      |      |      |      |      |      |      |      |      |      |
|-------------|------|------|------|------|------|------|------|------|------|------|
| IPI = <6    | 521  | 507  | 493  | 478  | 465  | 461  | 459  | 457  | 454  | 454  |
| IPI = 6-11  | 636  | 615  | 599  | 587  | 575  | 573  | 570  | 570  | 570  | 569  |
| IPI = 12-17 | 1203 | 1177 | 1145 | 1131 | 1120 | 1118 | 1115 | 1112 | 1111 | 1109 |
| IPI = 18-23 | 1006 | 979  | 952  | 942  | 933  | 932  | 931  | 926  | 926  | 922  |
| IPI = 24-59 | 1070 | 1033 | 974  | 964  | 952  | 948  | 947  | 944  | 943  | 942  |

E-Figure 1.46: Rwanda (2010/11)

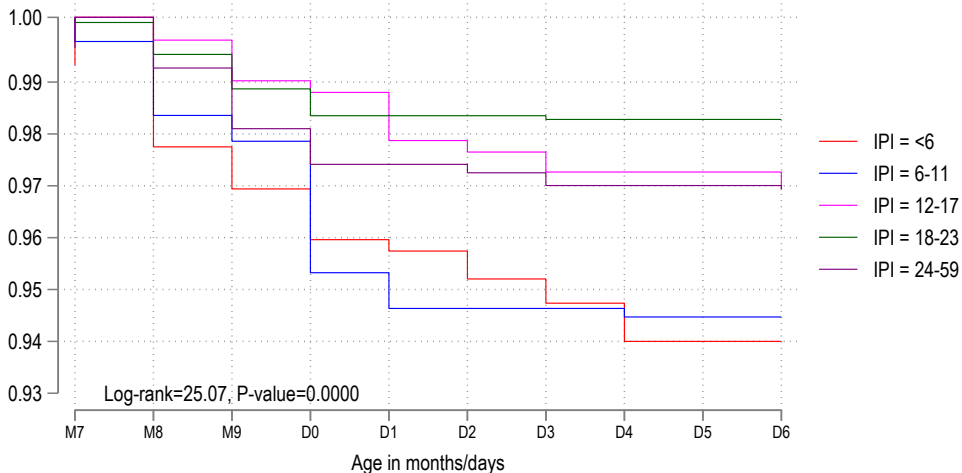

Number at risk

|             |      |      |      |      |      |      |      |      |      |      |
|-------------|------|------|------|------|------|------|------|------|------|------|
| IPI = <6    | 444  | 437  | 423  | 415  | 410  | 409  | 407  | 405  | 402  | 402  |
| IPI = 6-11  | 630  | 619  | 604  | 598  | 583  | 578  | 578  | 578  | 577  | 577  |
| IPI = 12-17 | 1015 | 1001 | 984  | 970  | 967  | 958  | 956  | 952  | 952  | 952  |
| IPI = 18-23 | 1024 | 1002 | 973  | 966  | 961  | 961  | 961  | 960  | 960  | 960  |
| IPI = 24-59 | 1388 | 1335 | 1281 | 1257 | 1248 | 1248 | 1246 | 1243 | 1243 | 1243 |



E-Figure 1.47: Rwanda (2014/15)

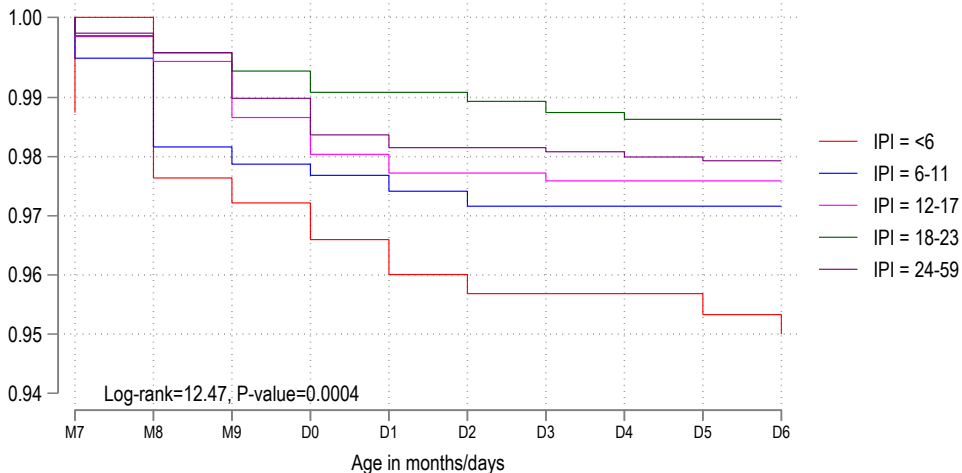

Number at risk

|             |      |      |      |      |      |      |      |      |      |      |
|-------------|------|------|------|------|------|------|------|------|------|------|
| IPI = <6    | 352  | 338  | 326  | 321  | 319  | 317  | 316  | 316  | 316  | 315  |
| IPI = 6-11  | 442  | 433  | 416  | 415  | 414  | 413  | 412  | 412  | 412  | 412  |
| IPI = 12-17 | 626  | 612  | 603  | 597  | 593  | 591  | 591  | 590  | 590  | 590  |
| IPI = 18-23 | 668  | 657  | 640  | 634  | 632  | 632  | 631  | 630  | 629  | 629  |
| IPI = 24-59 | 1352 | 1302 | 1252 | 1232 | 1224 | 1221 | 1221 | 1221 | 1220 | 1219 |

E-Figure 1.48: Rwanda (2019/20)

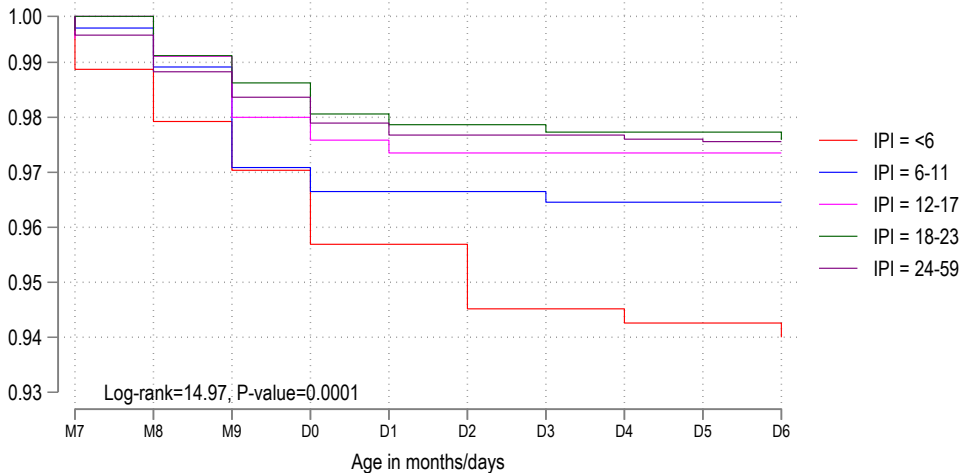

Number at risk

|             |      |      |      |      |      |      |      |      |      |      |
|-------------|------|------|------|------|------|------|------|------|------|------|
| IPI = <6    | 373  | 361  | 350  | 346  | 342  | 342  | 337  | 337  | 336  | 336  |
| IPI = 6-11  | 487  | 474  | 458  | 447  | 445  | 445  | 445  | 444  | 444  | 444  |
| IPI = 12-17 | 709  | 691  | 680  | 669  | 666  | 664  | 664  | 664  | 664  | 664  |
| IPI = 18-23 | 653  | 642  | 629  | 622  | 618  | 617  | 617  | 616  | 616  | 616  |
| IPI = 24-59 | 1423 | 1377 | 1333 | 1318 | 1312 | 1309 | 1309 | 1309 | 1308 | 1307 |

E-Figure 1.49: Senegal (2005)

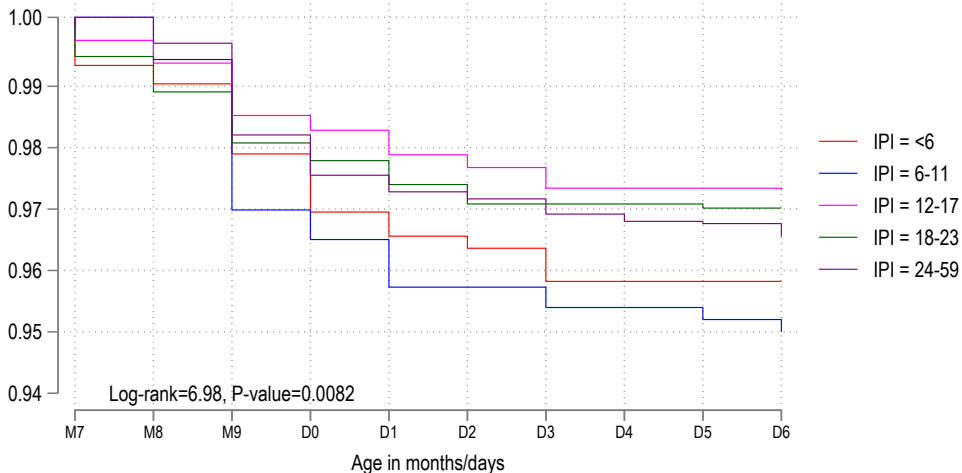

Number at risk

|             |      |      |      |      |      |      |      |      |      |      |
|-------------|------|------|------|------|------|------|------|------|------|------|
| IPI = <6    | 384  | 371  | 365  | 358  | 355  | 353  | 353  | 351  | 351  | 351  |
| IPI = 6-11  | 586  | 572  | 557  | 539  | 537  | 532  | 532  | 530  | 530  | 529  |
| IPI = 12-17 | 1218 | 1195 | 1170 | 1141 | 1138 | 1133 | 1131 | 1127 | 1127 | 1127 |
| IPI = 18-23 | 1043 | 1009 | 980  | 961  | 959  | 955  | 952  | 952  | 952  | 951  |
| IPI = 24-59 | 1427 | 1369 | 1311 | 1275 | 1266 | 1263 | 1261 | 1258 | 1256 | 1256 |

E-Figure 1.50: Senegal (2010/11)

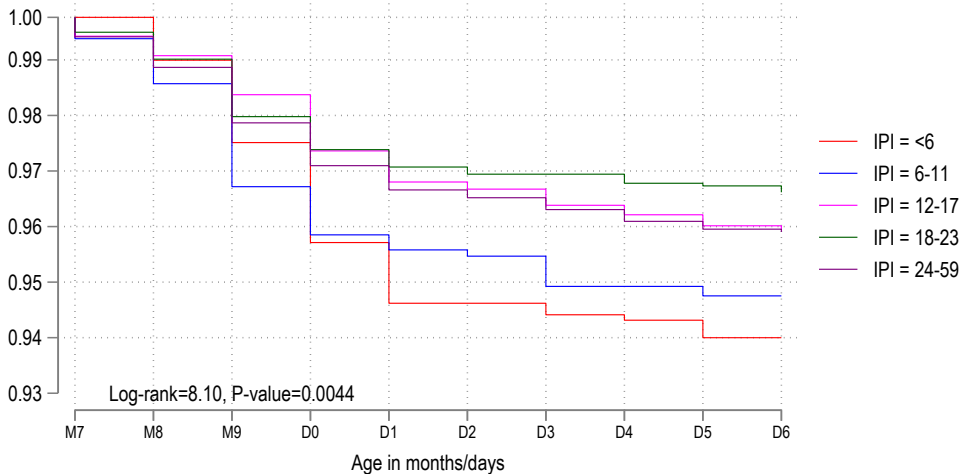

Number at risk

|             |      |      |      |      |      |      |      |      |      |      |
|-------------|------|------|------|------|------|------|------|------|------|------|
| IPI = <6    | 494  | 487  | 477  | 462  | 453  | 448  | 448  | 447  | 447  | 445  |
| IPI = 6-11  | 641  | 626  | 613  | 599  | 593  | 591  | 591  | 587  | 587  | 586  |
| IPI = 12-17 | 1412 | 1385 | 1354 | 1333 | 1319 | 1312 | 1310 | 1306 | 1304 | 1301 |
| IPI = 18-23 | 1350 | 1306 | 1261 | 1225 | 1217 | 1214 | 1212 | 1212 | 1210 | 1209 |
| IPI = 24-59 | 2063 | 1994 | 1924 | 1872 | 1858 | 1849 | 1847 | 1843 | 1839 | 1836 |

### E-Figure 1.51: Senegal (2015)

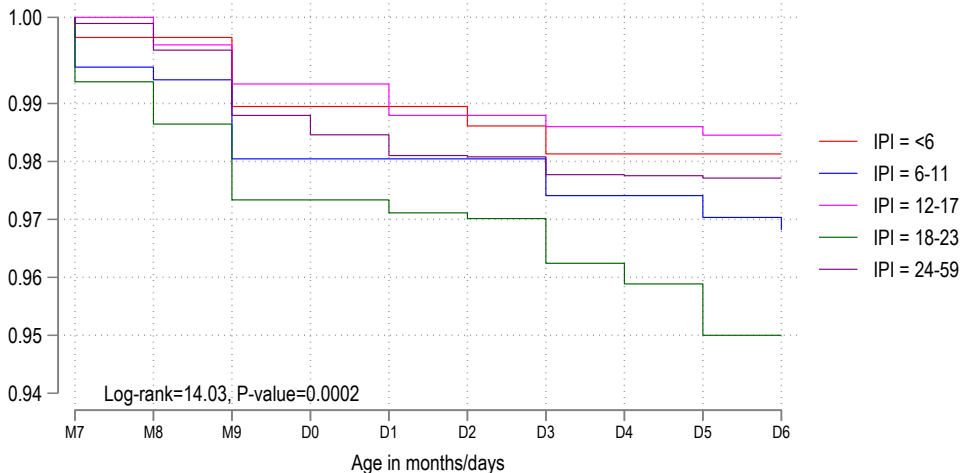

#### Number at risk

|             |     |     |     |     |     |     |     |     |     |     |
|-------------|-----|-----|-----|-----|-----|-----|-----|-----|-----|-----|
| IPI = <6    | 196 | 194 | 193 | 187 | 187 | 187 | 187 | 186 | 186 | 186 |
| IPI = 6-11  | 318 | 308 | 303 | 296 | 296 | 296 | 296 | 294 | 294 | 293 |
| IPI = 12-17 | 580 | 566 | 546 | 540 | 540 | 537 | 537 | 536 | 536 | 535 |
| IPI = 18-23 | 687 | 670 | 646 | 635 | 635 | 634 | 633 | 628 | 626 | 620 |
| IPI = 24-59 | 934 | 900 | 872 | 842 | 840 | 837 | 836 | 834 | 834 | 833 |

E-Figure 1.52: Senegal (2016)

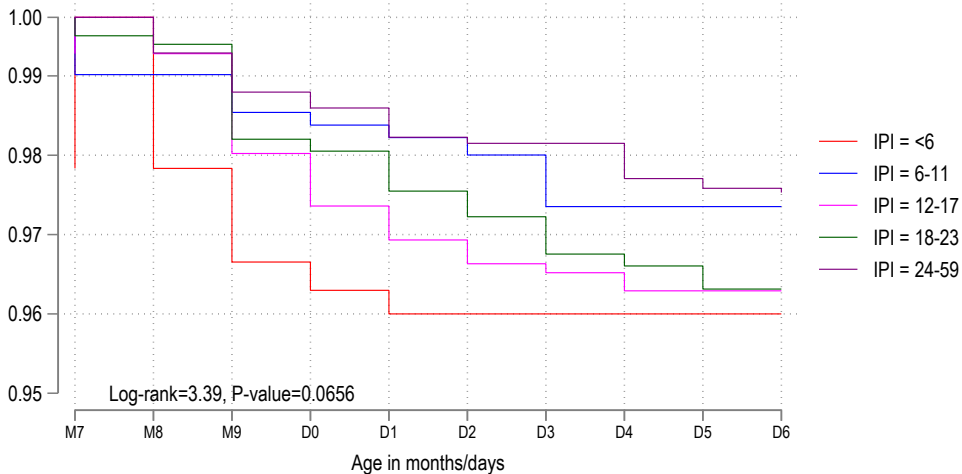

Number at risk

|             |     |     |     |     |     |     |     |     |     |     |
|-------------|-----|-----|-----|-----|-----|-----|-----|-----|-----|-----|
| IPI = <6    | 216 | 198 | 196 | 189 | 189 | 188 | 188 | 188 | 188 | 188 |
| IPI = 6-11  | 269 | 260 | 257 | 252 | 251 | 251 | 250 | 248 | 248 | 248 |
| IPI = 12-17 | 608 | 589 | 580 | 570 | 566 | 563 | 562 | 561 | 560 | 560 |
| IPI = 18-23 | 596 | 585 | 567 | 546 | 545 | 543 | 541 | 538 | 537 | 536 |
| IPI = 24-59 | 858 | 826 | 780 | 751 | 749 | 746 | 746 | 746 | 742 | 741 |

E-Figure 1.53: Senegal (2018)

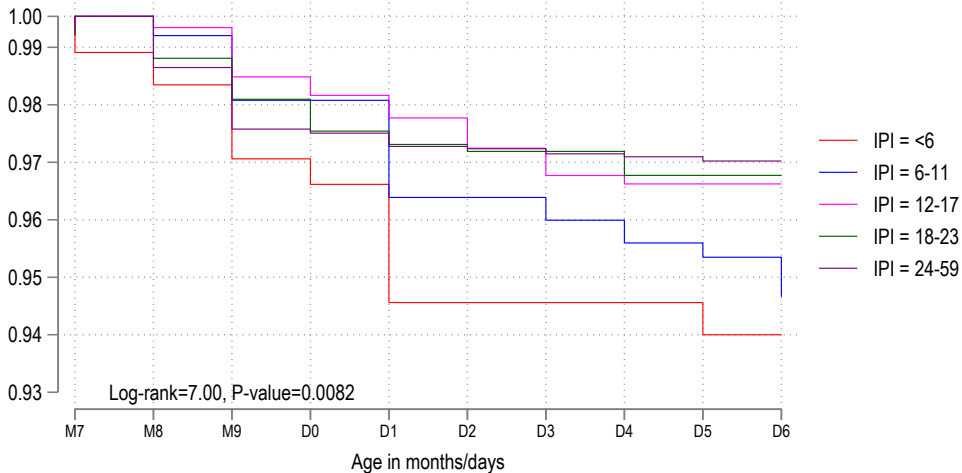

Number at risk

|             |     |     |     |     |     |     |     |     |     |     |
|-------------|-----|-----|-----|-----|-----|-----|-----|-----|-----|-----|
| IPI = <6    | 182 | 177 | 175 | 171 | 170 | 167 | 167 | 167 | 167 | 166 |
| IPI = 6-11  | 264 | 251 | 248 | 244 | 244 | 240 | 240 | 239 | 238 | 237 |
| IPI = 12-17 | 596 | 574 | 558 | 544 | 542 | 540 | 537 | 534 | 534 | 534 |
| IPI = 18-23 | 601 | 580 | 563 | 556 | 553 | 552 | 551 | 551 | 549 | 549 |
| IPI = 24-59 | 927 | 884 | 843 | 812 | 812 | 810 | 810 | 809 | 808 | 807 |

### E-Figure 1.54: Senegal (2019)

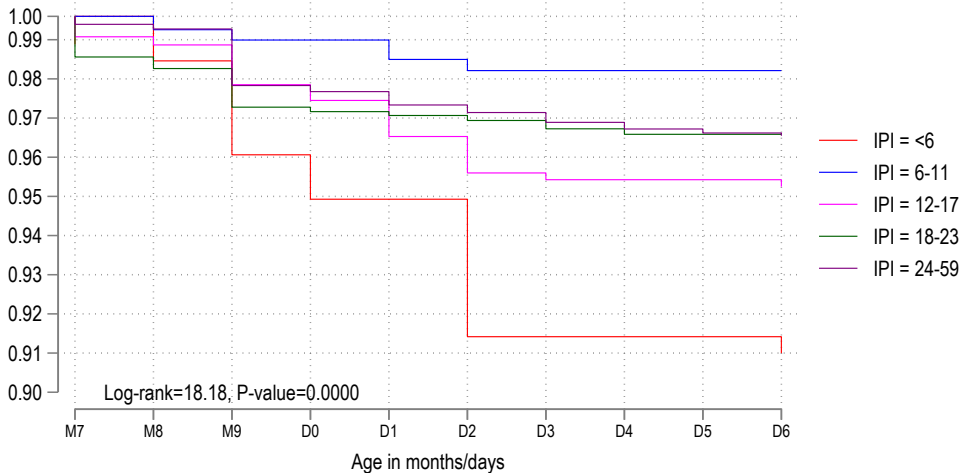

#### Number at risk

|             | M7  | M8  | M9  | D0  | D1  | D2  | D3  | D4  | D5  | D6  |
|-------------|-----|-----|-----|-----|-----|-----|-----|-----|-----|-----|
| IPI = <6    | 184 | 179 | 175 | 170 | 168 | 168 | 162 | 162 | 162 | 162 |
| IPI = 6-11  | 253 | 248 | 240 | 232 | 232 | 231 | 230 | 230 | 230 | 230 |
| IPI = 12-17 | 515 | 504 | 495 | 481 | 479 | 475 | 470 | 469 | 469 | 469 |
| IPI = 18-23 | 593 | 579 | 566 | 549 | 548 | 547 | 547 | 545 | 545 | 545 |
| IPI = 24-59 | 843 | 814 | 778 | 741 | 740 | 737 | 736 | 734 | 732 | 732 |



E-Figure 1.55: Sierra Leone (2008)

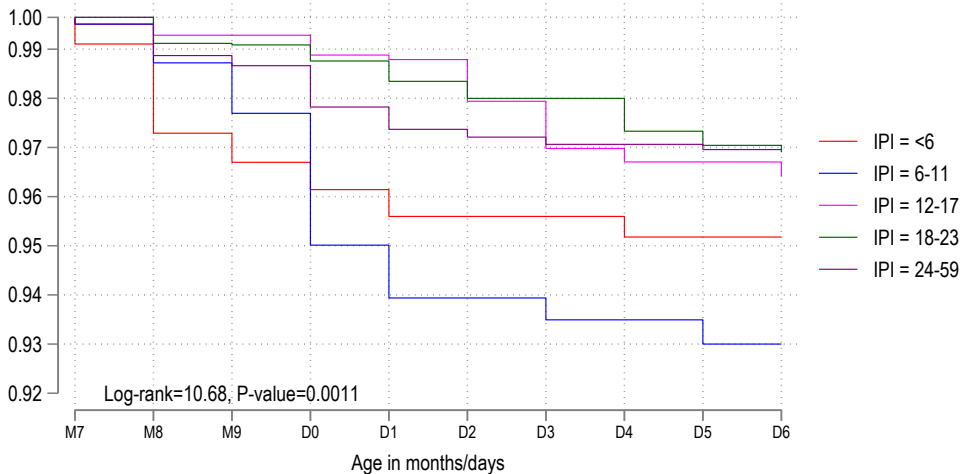

Number at risk

|             |     |     |     |     |     |     |     |     |     |     |
|-------------|-----|-----|-----|-----|-----|-----|-----|-----|-----|-----|
| IPI = <6    | 170 | 168 | 164 | 163 | 162 | 161 | 161 | 161 | 160 | 160 |
| IPI = 6-11  | 264 | 260 | 253 | 247 | 240 | 237 | 237 | 236 | 236 | 235 |
| IPI = 12-17 | 567 | 560 | 541 | 541 | 539 | 538 | 534 | 528 | 527 | 527 |
| IPI = 18-23 | 466 | 455 | 437 | 429 | 428 | 426 | 425 | 425 | 422 | 420 |
| IPI = 24-59 | 880 | 845 | 795 | 787 | 780 | 776 | 775 | 774 | 774 | 773 |

E-Figure 1.56: Sierra Leone (2013)

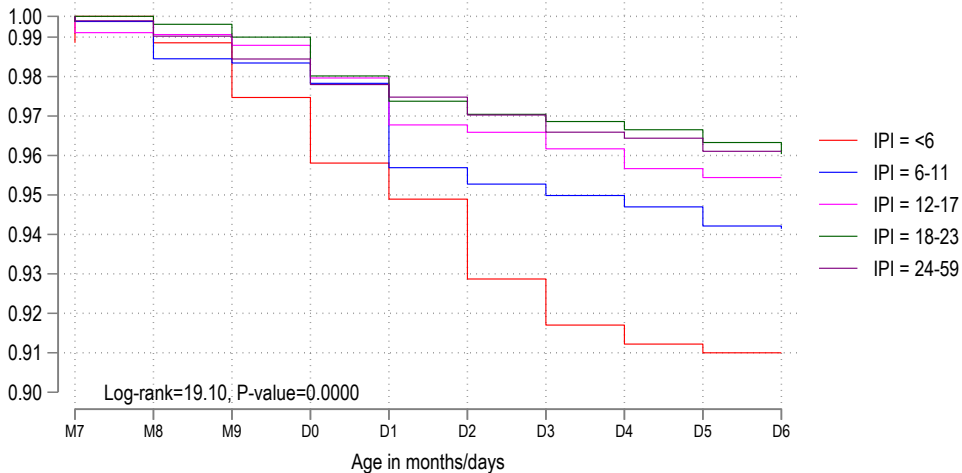

Number at risk

|             |      |      |      |      |      |      |      |      |      |      |
|-------------|------|------|------|------|------|------|------|------|------|------|
| IPI = <6    | 280  | 273  | 266  | 261  | 257  | 254  | 249  | 246  | 245  | 244  |
| IPI = 6-11  | 545  | 537  | 528  | 522  | 520  | 508  | 506  | 505  | 503  | 501  |
| IPI = 12-17 | 1205 | 1190 | 1174 | 1157 | 1148 | 1134 | 1131 | 1127 | 1121 | 1118 |
| IPI = 18-23 | 1211 | 1184 | 1144 | 1124 | 1113 | 1106 | 1102 | 1100 | 1098 | 1094 |
| IPI = 24-59 | 1998 | 1925 | 1842 | 1774 | 1762 | 1756 | 1748 | 1740 | 1738 | 1732 |

E-Figure 1.57: Tanzania (2004/5)

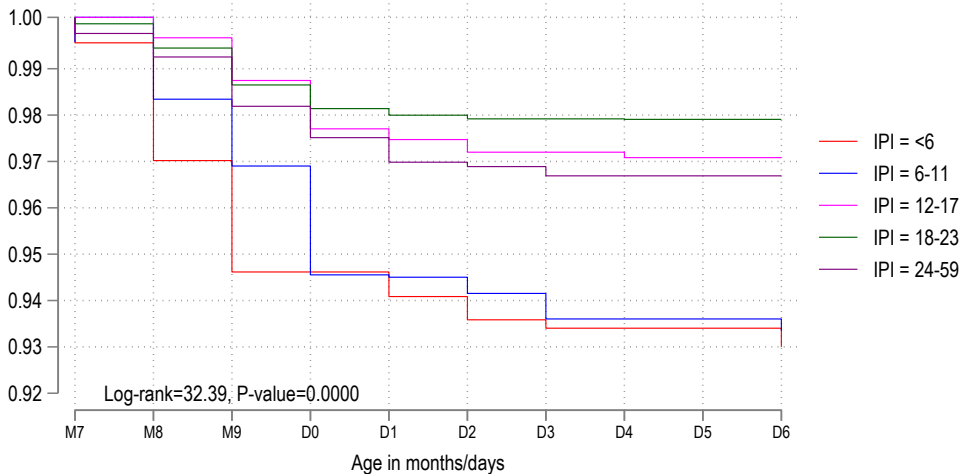

Number at risk

|             |      |      |      |      |      |      |      |      |      |      |
|-------------|------|------|------|------|------|------|------|------|------|------|
| IPI = <6    | 329  | 317  | 301  | 291  | 291  | 290  | 288  | 287  | 287  | 287  |
| IPI = 6-11  | 502  | 489  | 475  | 465  | 453  | 453  | 451  | 449  | 449  | 449  |
| IPI = 12-17 | 1136 | 1113 | 1096 | 1082 | 1070 | 1068 | 1065 | 1065 | 1064 | 1064 |
| IPI = 18-23 | 1126 | 1102 | 1061 | 1043 | 1037 | 1036 | 1035 | 1035 | 1035 | 1035 |
| IPI = 24-59 | 1477 | 1429 | 1363 | 1324 | 1315 | 1308 | 1307 | 1304 | 1304 | 1304 |

E-Figure 1.58: Tanzania (2010)

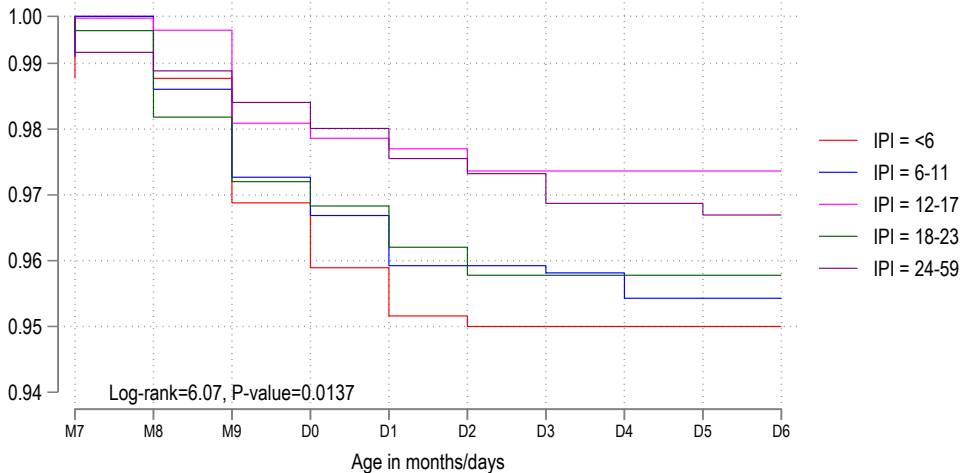

Number at risk

|             |     |     |     |     |     |     |     |     |     |     |
|-------------|-----|-----|-----|-----|-----|-----|-----|-----|-----|-----|
| IPI = <6    | 224 | 215 | 210 | 204 | 201 | 200 | 200 | 200 | 200 | 200 |
| IPI = 6-11  | 405 | 394 | 387 | 378 | 375 | 372 | 372 | 372 | 370 | 370 |
| IPI = 12-17 | 839 | 820 | 794 | 776 | 775 | 773 | 771 | 771 | 771 | 771 |
| IPI = 18-23 | 847 | 821 | 782 | 766 | 763 | 758 | 755 | 755 | 755 | 755 |
| IPI = 24-59 | 963 | 926 | 879 | 857 | 854 | 850 | 848 | 844 | 844 | 843 |

E-Figure 1.59: Tanzania (2015/16)

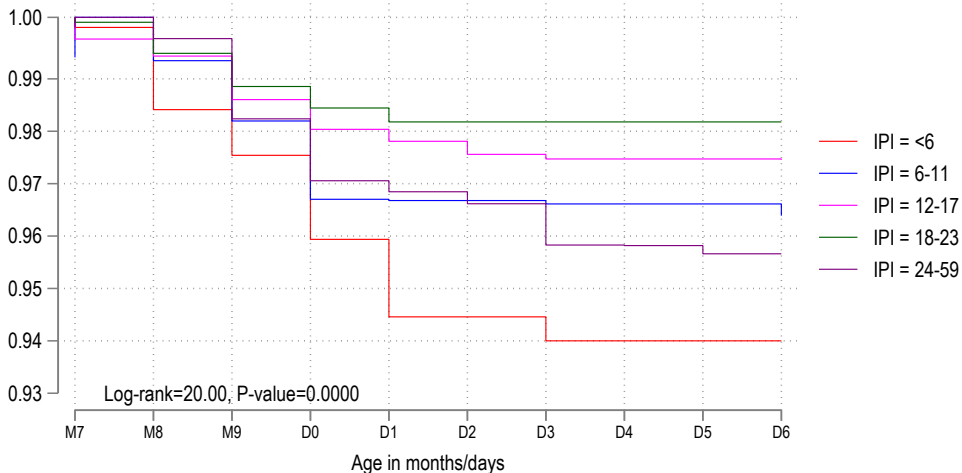

Number at risk

|             |      |      |      |      |      |      |      |      |      |      |
|-------------|------|------|------|------|------|------|------|------|------|------|
| IPI = <6    | 406  | 398  | 384  | 376  | 369  | 364  | 364  | 362  | 362  | 362  |
| IPI = 6-11  | 586  | 576  | 563  | 554  | 546  | 546  | 546  | 545  | 545  | 545  |
| IPI = 12-17 | 1117 | 1096 | 1073 | 1056 | 1050 | 1047 | 1044 | 1043 | 1043 | 1043 |
| IPI = 18-23 | 991  | 966  | 939  | 927  | 923  | 920  | 920  | 920  | 920  | 920  |
| IPI = 24-59 | 1507 | 1459 | 1385 | 1351 | 1335 | 1332 | 1329 | 1318 | 1318 | 1316 |

E-Figure 1.60: Uganda (2000/1)

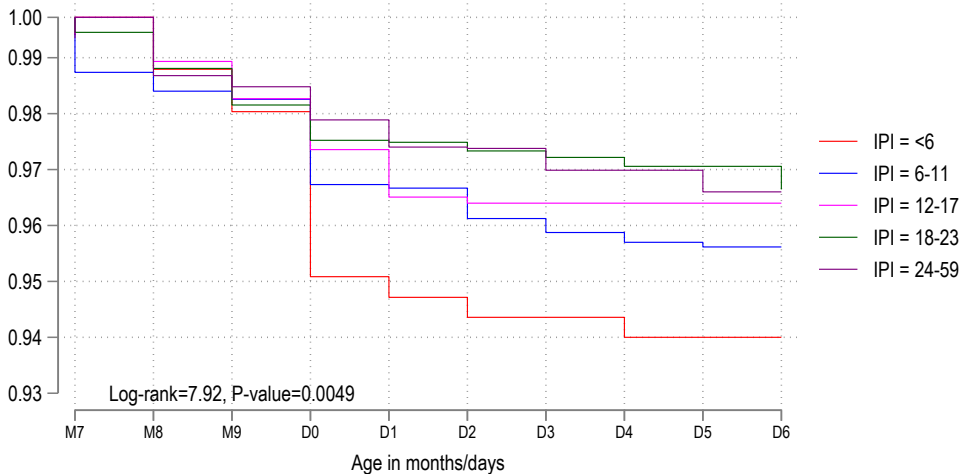

Number at risk

|             |      |      |      |      |      |      |      |      |      |      |
|-------------|------|------|------|------|------|------|------|------|------|------|
| IPI = <6    | 443  | 438  | 430  | 425  | 412  | 411  | 409  | 409  | 407  | 407  |
| IPI = 6-11  | 824  | 797  | 778  | 775  | 763  | 762  | 758  | 756  | 755  | 754  |
| IPI = 12-17 | 1368 | 1329 | 1291 | 1272 | 1260 | 1249 | 1248 | 1248 | 1248 | 1248 |
| IPI = 18-23 | 1045 | 1022 | 991  | 977  | 971  | 970  | 969  | 968  | 966  | 966  |
| IPI = 24-59 | 1049 | 1018 | 973  | 962  | 956  | 951  | 951  | 947  | 947  | 943  |

E-Figure 1.61: Uganda (2006)

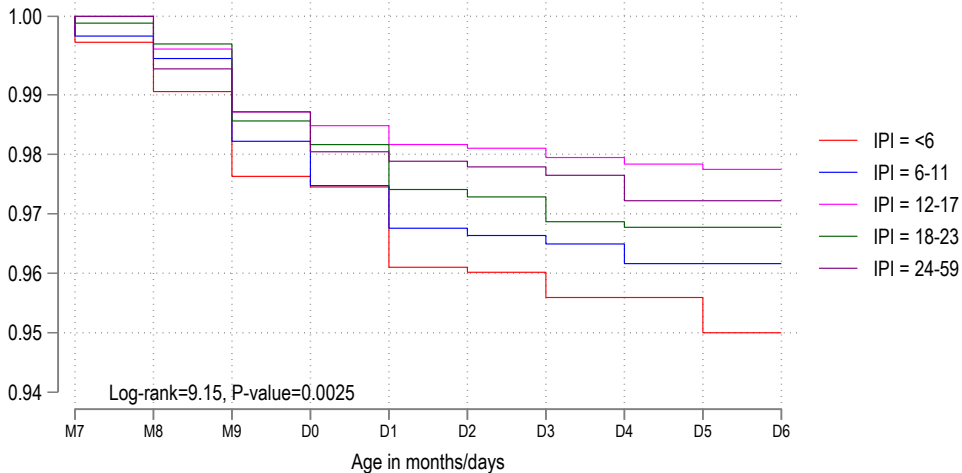

Number at risk

|             |      |      |      |      |      |      |      |      |      |      |
|-------------|------|------|------|------|------|------|------|------|------|------|
| IPI = <6    | 502  | 489  | 479  | 467  | 467  | 460  | 460  | 458  | 458  | 453  |
| IPI = 6-11  | 746  | 731  | 712  | 696  | 691  | 686  | 685  | 684  | 682  | 682  |
| IPI = 12-17 | 1254 | 1232 | 1189 | 1163 | 1160 | 1157 | 1156 | 1154 | 1153 | 1151 |
| IPI = 18-23 | 1032 | 999  | 962  | 938  | 934  | 927  | 925  | 921  | 921  | 921  |
| IPI = 24-59 | 1005 | 963  | 927  | 904  | 898  | 897  | 896  | 895  | 891  | 889  |

E-Figure 1.62: Uganda (2011)

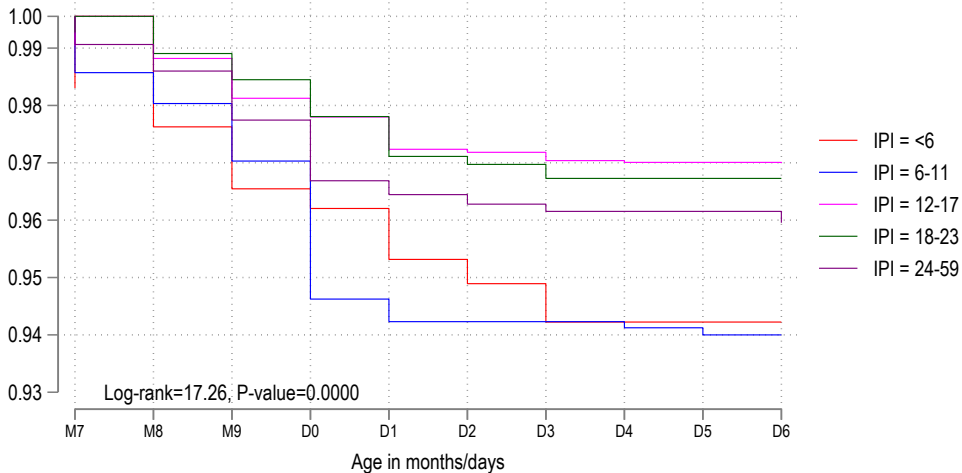

Number at risk

|             |      |      |      |      |      |      |      |      |      |      |
|-------------|------|------|------|------|------|------|------|------|------|------|
| IPI = <6    | 478  | 462  | 439  | 432  | 430  | 426  | 424  | 422  | 422  | 422  |
| IPI = 6-11  | 761  | 743  | 717  | 701  | 684  | 681  | 681  | 681  | 680  | 679  |
| IPI = 12-17 | 1247 | 1219 | 1185 | 1168 | 1164 | 1157 | 1157 | 1155 | 1154 | 1154 |
| IPI = 18-23 | 963  | 936  | 906  | 894  | 888  | 882  | 881  | 878  | 878  | 878  |
| IPI = 24-59 | 1057 | 1005 | 960  | 935  | 925  | 923  | 921  | 920  | 920  | 920  |



E-Figure 1.63: Zambia (2007)

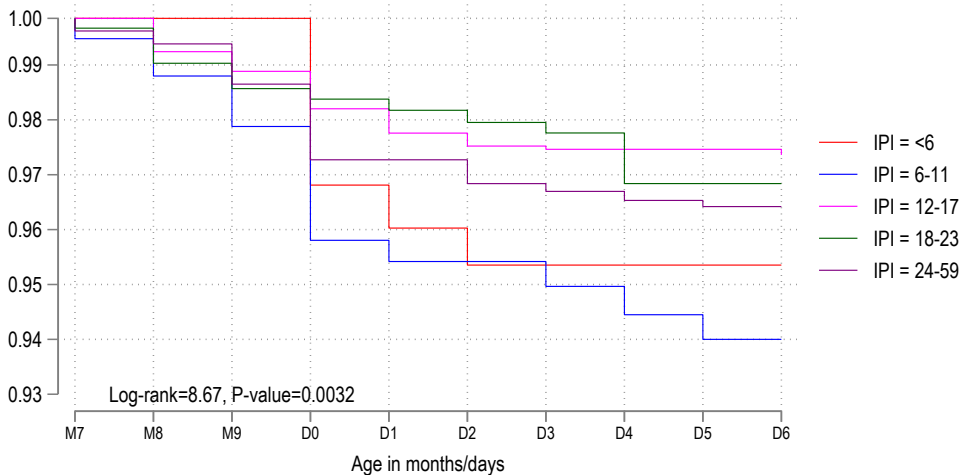

Number at risk

|             |      |     |     |     |     |     |     |     |     |     |
|-------------|------|-----|-----|-----|-----|-----|-----|-----|-----|-----|
| IPI = <6    | 209  | 207 | 200 | 196 | 190 | 188 | 187 | 187 | 187 | 187 |
| IPI = 6-11  | 356  | 348 | 340 | 335 | 328 | 326 | 326 | 325 | 323 | 321 |
| IPI = 12-17 | 698  | 679 | 659 | 650 | 646 | 643 | 641 | 641 | 641 | 641 |
| IPI = 18-23 | 738  | 722 | 699 | 681 | 679 | 678 | 677 | 675 | 669 | 669 |
| IPI = 24-59 | 1010 | 969 | 938 | 921 | 908 | 908 | 904 | 903 | 902 | 901 |

E-Figure 1.64: Zambia (2013/14)

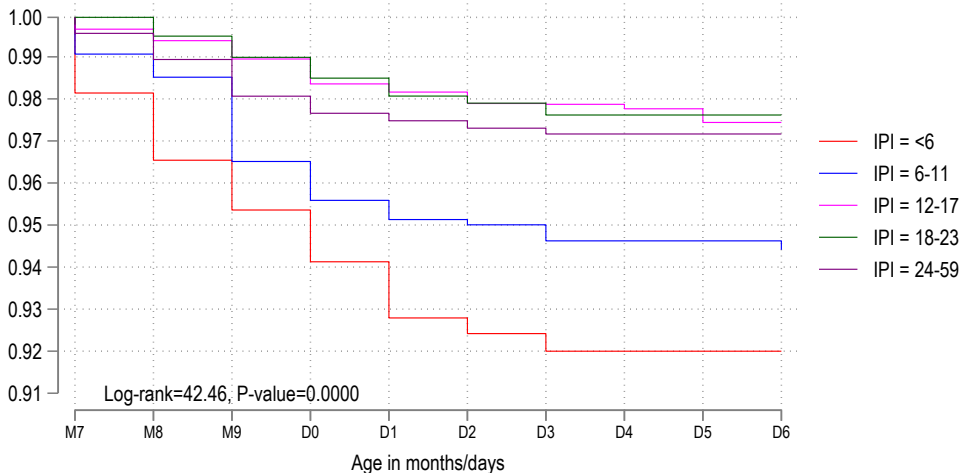

Number at risk

|             |      |      |      |      |      |      |      |      |      |      |
|-------------|------|------|------|------|------|------|------|------|------|------|
| IPI = <6    | 305  | 294  | 286  | 279  | 275  | 271  | 270  | 269  | 269  | 269  |
| IPI = 6-11  | 722  | 709  | 698  | 679  | 673  | 670  | 669  | 666  | 666  | 665  |
| IPI = 12-17 | 1377 | 1360 | 1343 | 1324 | 1316 | 1313 | 1310 | 1309 | 1308 | 1303 |
| IPI = 18-23 | 1506 | 1480 | 1444 | 1426 | 1418 | 1412 | 1410 | 1406 | 1406 | 1406 |
| IPI = 24-59 | 2456 | 2375 | 2268 | 2213 | 2204 | 2200 | 2196 | 2193 | 2193 | 2192 |

E-Figure 1.65: Zambia (2018/19)

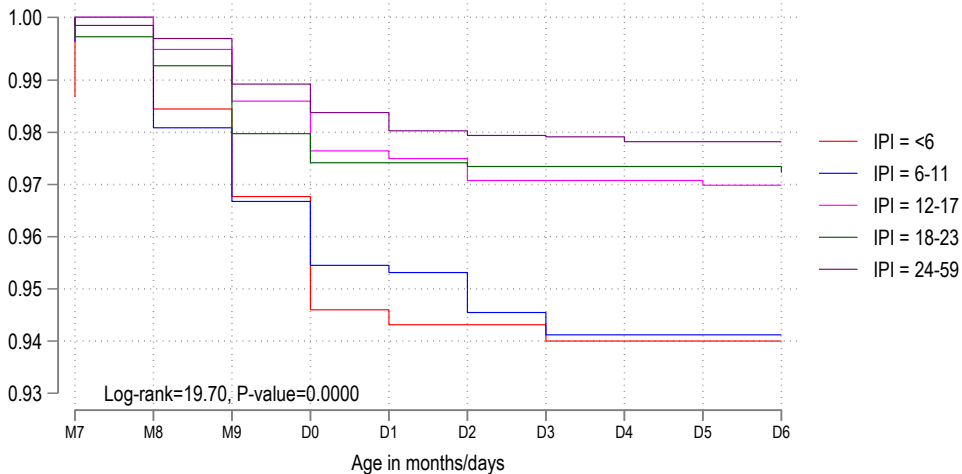

Number at risk

|             |      |      |      |      |      |      |      |      |      |      |
|-------------|------|------|------|------|------|------|------|------|------|------|
| IPI = <6    | 251  | 246  | 241  | 235  | 229  | 229  | 229  | 228  | 228  | 228  |
| IPI = 6-11  | 355  | 346  | 335  | 328  | 324  | 323  | 321  | 319  | 319  | 319  |
| IPI = 12-17 | 801  | 784  | 768  | 749  | 742  | 740  | 737  | 737  | 737  | 737  |
| IPI = 18-23 | 765  | 753  | 729  | 709  | 705  | 705  | 704  | 704  | 704  | 704  |
| IPI = 24-59 | 1668 | 1600 | 1543 | 1494 | 1486 | 1480 | 1479 | 1479 | 1477 | 1476 |

E-Figure 1.66: Zimbabwe (2010/11)

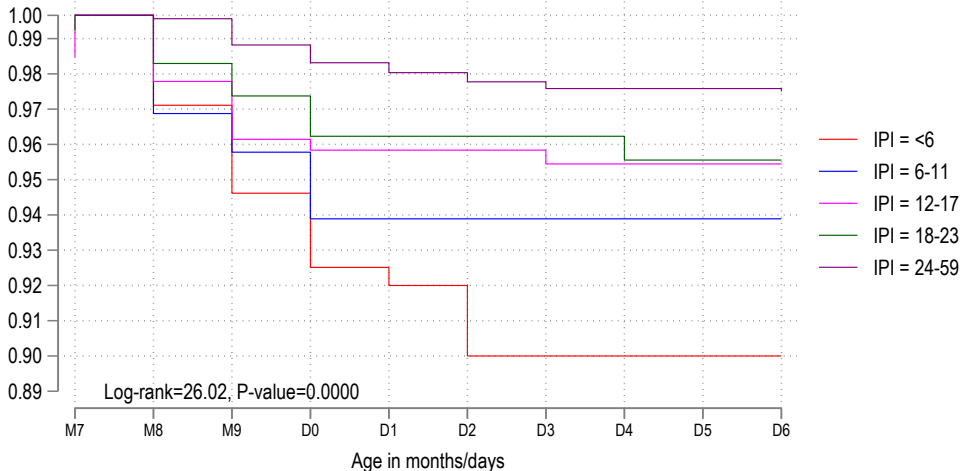

Number at risk

|             |      |     |     |     |     |     |     |     |     |     |
|-------------|------|-----|-----|-----|-----|-----|-----|-----|-----|-----|
| IPI = <6    | 179  | 179 | 171 | 165 | 161 | 161 | 157 | 157 | 157 | 157 |
| IPI = 6-11  | 191  | 186 | 174 | 166 | 163 | 163 | 163 | 163 | 163 | 161 |
| IPI = 12-17 | 275  | 265 | 252 | 244 | 243 | 243 | 243 | 242 | 242 | 242 |
| IPI = 18-23 | 328  | 320 | 307 | 299 | 295 | 295 | 295 | 295 | 293 | 293 |
| IPI = 24-59 | 1002 | 961 | 917 | 888 | 884 | 881 | 879 | 877 | 877 | 877 |

E-Figure 1.67: Zimbabwe (2015)

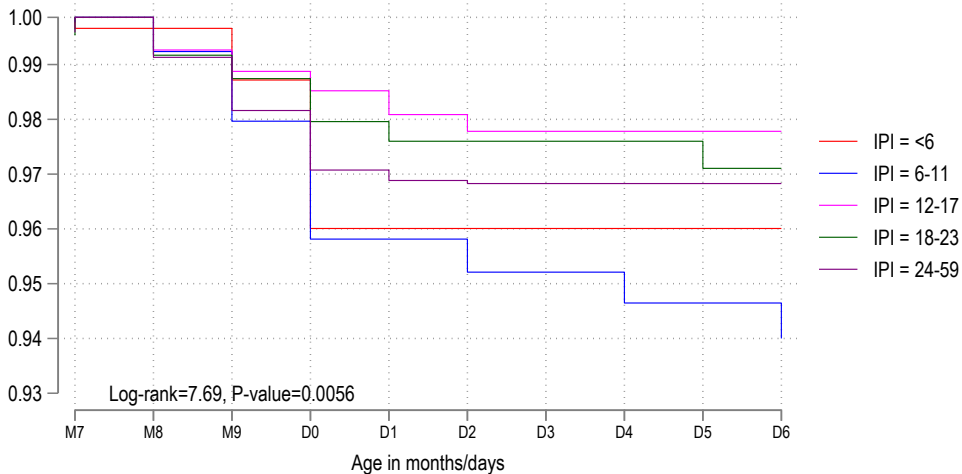

Number at risk

|             |     |     |     |     |     |     |     |     |     |     |
|-------------|-----|-----|-----|-----|-----|-----|-----|-----|-----|-----|
| IPI = <6    | 198 | 195 | 189 | 182 | 177 | 177 | 177 | 177 | 177 | 177 |
| IPI = 6-11  | 258 | 251 | 247 | 243 | 237 | 237 | 236 | 236 | 234 | 234 |
| IPI = 12-17 | 407 | 406 | 395 | 390 | 389 | 387 | 386 | 386 | 386 | 386 |
| IPI = 18-23 | 435 | 427 | 419 | 411 | 408 | 406 | 406 | 406 | 406 | 404 |
| IPI = 24-59 | 946 | 919 | 880 | 860 | 850 | 848 | 848 | 848 | 848 | 848 |

E-Figure 1.68: Egypt (2000)

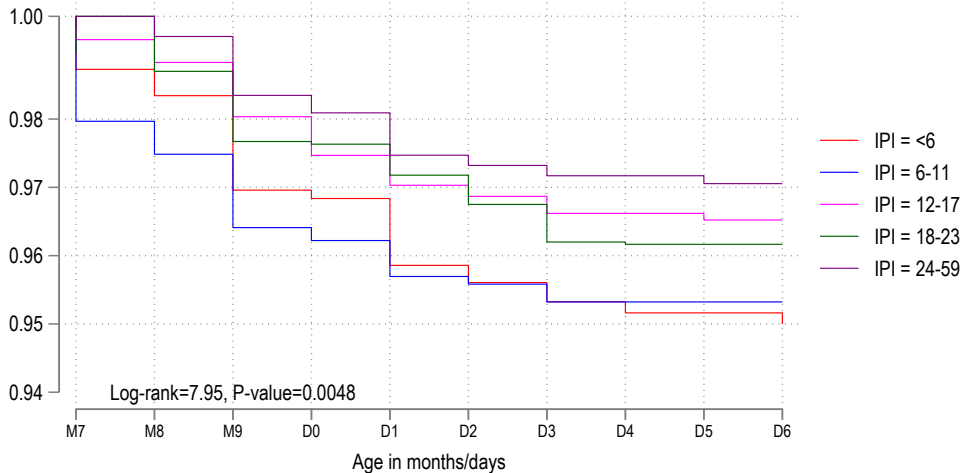

Number at risk

|             |      |     |     |     |     |     |     |     |     |     |
|-------------|------|-----|-----|-----|-----|-----|-----|-----|-----|-----|
| IPI = <6    | 858  | 837 | 819 | 808 | 807 | 799 | 797 | 794 | 793 | 792 |
| IPI = 6-11  | 785  | 768 | 744 | 735 | 734 | 730 | 729 | 727 | 727 | 727 |
| IPI = 12-17 | 971  | 960 | 933 | 924 | 919 | 915 | 913 | 911 | 911 | 910 |
| IPI = 18-23 | 748  | 720 | 697 | 690 | 690 | 687 | 684 | 680 | 679 | 679 |
| IPI = 24-59 | 1030 | 988 | 940 | 932 | 930 | 924 | 922 | 921 | 921 | 918 |

E-Figure 1.69: Egypt (2003)

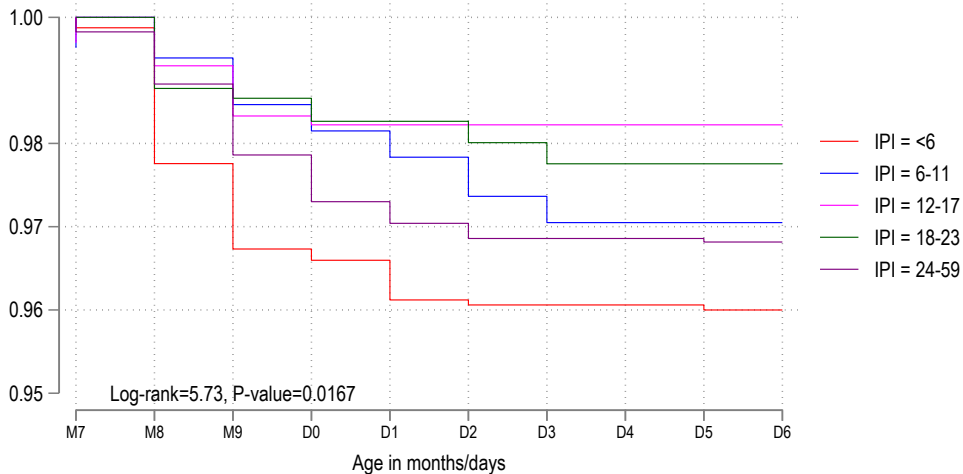

Number at risk

|             |     |     |     |     |     |     |     |     |     |     |
|-------------|-----|-----|-----|-----|-----|-----|-----|-----|-----|-----|
| IPI = <6    | 422 | 418 | 406 | 402 | 401 | 399 | 399 | 399 | 399 | 399 |
| IPI = 6-11  | 413 | 403 | 396 | 394 | 393 | 391 | 389 | 388 | 388 | 388 |
| IPI = 12-17 | 492 | 477 | 465 | 462 | 462 | 462 | 462 | 462 | 462 | 462 |
| IPI = 18-23 | 442 | 436 | 419 | 418 | 417 | 417 | 416 | 415 | 415 | 415 |
| IPI = 24-59 | 649 | 618 | 584 | 579 | 575 | 574 | 573 | 573 | 573 | 572 |

### E-Figure 1.70: Egypt (2005)

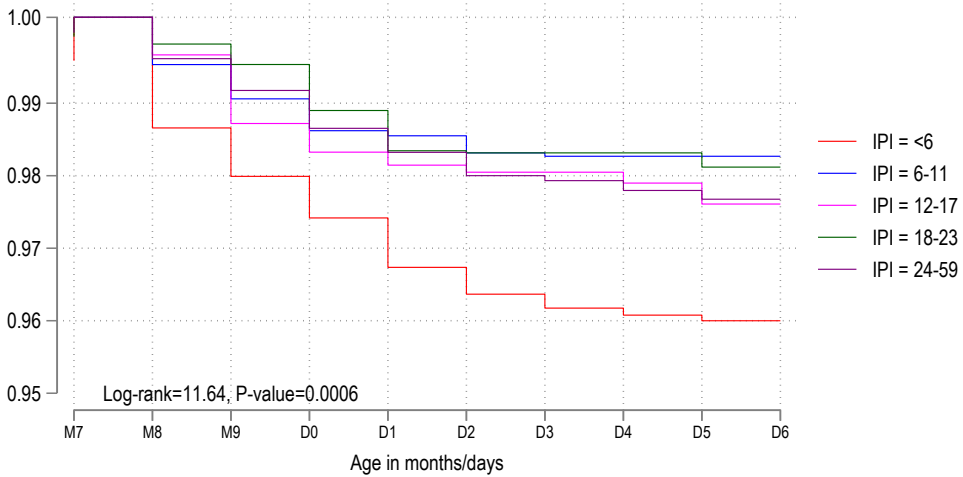

#### Number at risk

|             |      |      |      |      |      |      |      |      |      |      |
|-------------|------|------|------|------|------|------|------|------|------|------|
| IPI = <6    | 939  | 920  | 901  | 895  | 890  | 883  | 880  | 878  | 877  | 875  |
| IPI = 6-11  | 884  | 873  | 845  | 839  | 836  | 835  | 833  | 833  | 833  | 833  |
| IPI = 12-17 | 1066 | 1047 | 1017 | 1007 | 1003 | 1001 | 1000 | 1000 | 999  | 994  |
| IPI = 18-23 | 883  | 866  | 832  | 828  | 822  | 818  | 818  | 818  | 818  | 816  |
| IPI = 24-59 | 1407 | 1360 | 1295 | 1283 | 1276 | 1272 | 1268 | 1267 | 1265 | 1264 |



E-Figure 1.71: Egypt (2008)

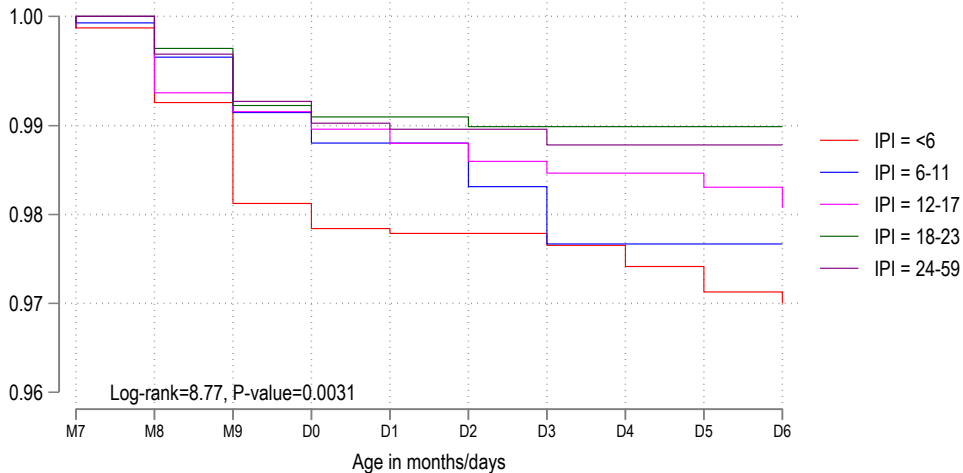

Number at risk

|             |      |      |     |     |     |     |     |     |     |     |
|-------------|------|------|-----|-----|-----|-----|-----|-----|-----|-----|
| IPI = <6    | 627  | 618  | 605 | 597 | 595 | 595 | 595 | 594 | 592 | 591 |
| IPI = 6-11  | 540  | 535  | 516 | 510 | 509 | 509 | 506 | 503 | 503 | 503 |
| IPI = 12-17 | 659  | 642  | 623 | 621 | 619 | 618 | 617 | 616 | 616 | 615 |
| IPI = 18-23 | 643  | 631  | 610 | 604 | 604 | 604 | 603 | 603 | 603 | 603 |
| IPI = 24-59 | 1074 | 1025 | 978 | 970 | 968 | 967 | 967 | 965 | 965 | 965 |

### E-Figure 1.72: Egypt (2014)

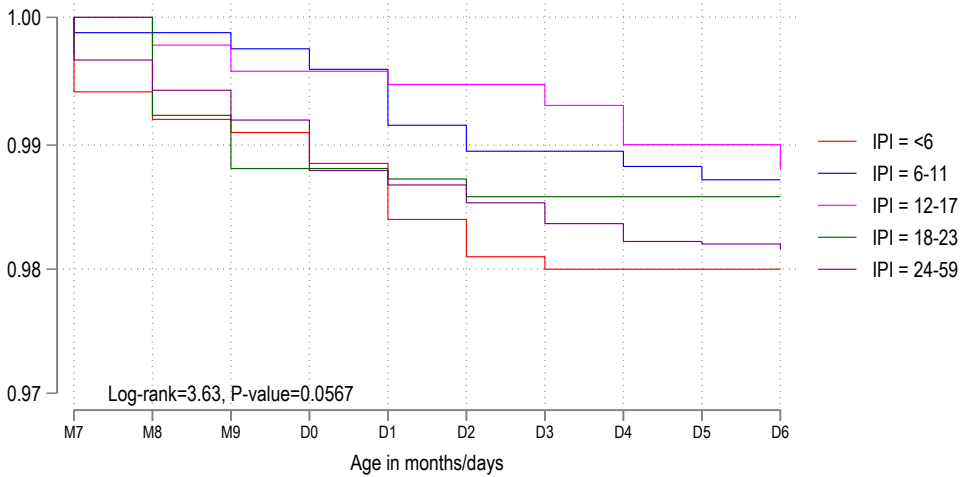

#### Number at risk

|             |      |      |      |      |      |      |      |      |      |      |
|-------------|------|------|------|------|------|------|------|------|------|------|
| IPI = <6    | 988  | 963  | 947  | 944  | 942  | 938  | 935  | 934  | 934  | 934  |
| IPI = 6-11  | 1086 | 1060 | 1044 | 1043 | 1041 | 1037 | 1034 | 1034 | 1033 | 1031 |
| IPI = 12-17 | 1168 | 1130 | 1101 | 1098 | 1098 | 1097 | 1097 | 1095 | 1092 | 1092 |
| IPI = 18-23 | 945  | 918  | 885  | 881  | 881  | 880  | 879  | 879  | 879  | 879  |
| IPI = 24-59 | 1566 | 1491 | 1408 | 1405 | 1399 | 1397 | 1395 | 1393 | 1391 | 1390 |

E-Figure 1.73: Jordan (2002)

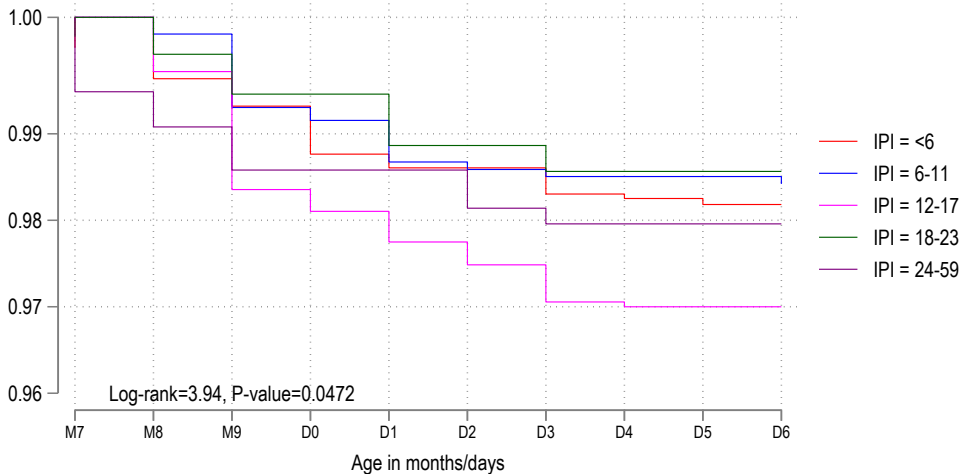

Number at risk

|             |     |     |     |     |     |     |     |     |     |     |
|-------------|-----|-----|-----|-----|-----|-----|-----|-----|-----|-----|
| IPI = <6    | 707 | 692 | 674 | 665 | 661 | 660 | 660 | 658 | 658 | 657 |
| IPI = 6-11  | 818 | 801 | 784 | 773 | 772 | 768 | 767 | 767 | 767 | 767 |
| IPI = 12-17 | 652 | 639 | 623 | 604 | 603 | 601 | 599 | 596 | 596 | 596 |
| IPI = 18-23 | 378 | 367 | 355 | 348 | 348 | 346 | 346 | 345 | 345 | 345 |
| IPI = 24-59 | 583 | 558 | 530 | 524 | 524 | 524 | 522 | 521 | 521 | 521 |

E-Figure 1.74: Jordan (2009)

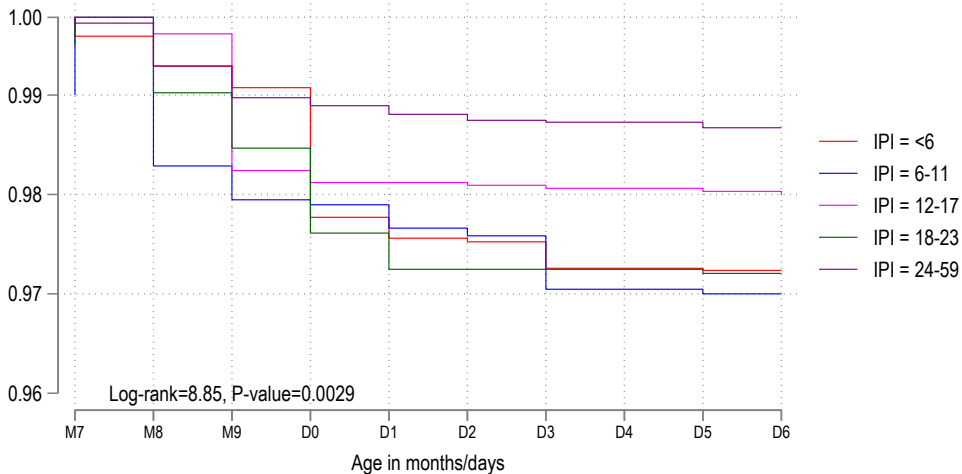

Number at risk

|             |      |      |      |      |      |      |      |      |      |      |
|-------------|------|------|------|------|------|------|------|------|------|------|
| IPI = <6    | 1236 | 1211 | 1191 | 1188 | 1172 | 1170 | 1169 | 1166 | 1166 | 1166 |
| IPI = 6-11  | 1226 | 1185 | 1147 | 1139 | 1138 | 1135 | 1134 | 1128 | 1128 | 1128 |
| IPI = 12-17 | 1021 | 996  | 964  | 950  | 949  | 949  | 949  | 949  | 949  | 948  |
| IPI = 18-23 | 604  | 582  | 548  | 545  | 541  | 539  | 539  | 539  | 539  | 538  |
| IPI = 24-59 | 978  | 946  | 879  | 875  | 874  | 873  | 873  | 873  | 873  | 872  |

E-Figure 1.75: Jordan (2012)

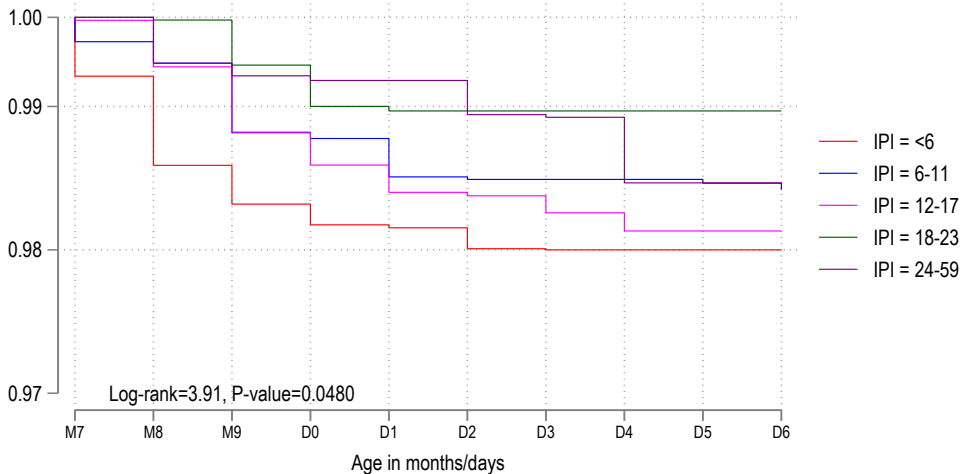

Number at risk

|             |      |      |      |      |      |      |      |      |      |      |
|-------------|------|------|------|------|------|------|------|------|------|------|
| IPI = <6    | 1185 | 1167 | 1125 | 1116 | 1115 | 1115 | 1113 | 1113 | 1113 | 1112 |
| IPI = 6-11  | 1325 | 1307 | 1263 | 1249 | 1249 | 1245 | 1245 | 1245 | 1245 | 1245 |
| IPI = 12-17 | 961  | 938  | 900  | 895  | 893  | 892  | 891  | 890  | 889  | 889  |
| IPI = 18-23 | 713  | 695  | 658  | 656  | 654  | 654  | 654  | 654  | 654  | 654  |
| IPI = 24-59 | 1091 | 1056 | 996  | 993  | 993  | 993  | 990  | 990  | 986  | 986  |

E-Figure 1.76: Jordan (2017/18)

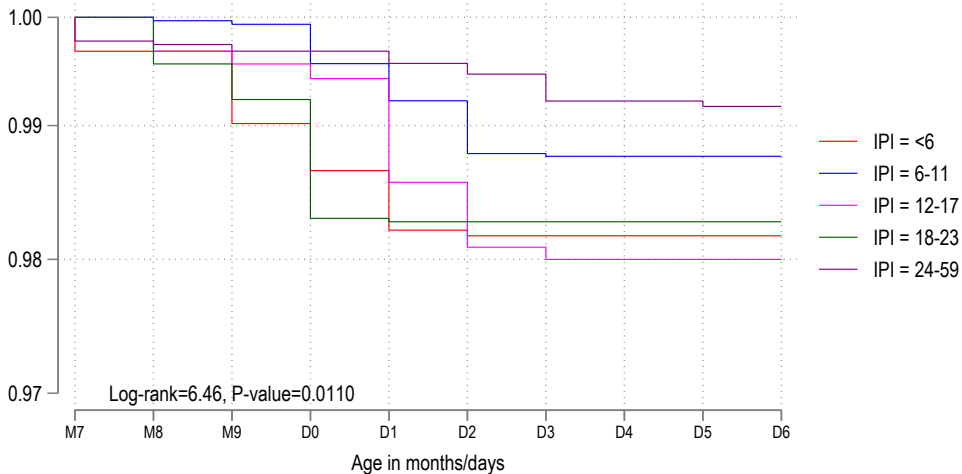

Number at risk

|             |      |      |      |      |      |      |      |      |      |      |
|-------------|------|------|------|------|------|------|------|------|------|------|
| IPI = <6    | 999  | 966  | 955  | 937  | 934  | 929  | 929  | 929  | 929  | 929  |
| IPI = 6-11  | 1030 | 1009 | 986  | 973  | 970  | 968  | 964  | 964  | 964  | 964  |
| IPI = 12-17 | 780  | 764  | 750  | 738  | 737  | 732  | 728  | 727  | 727  | 727  |
| IPI = 18-23 | 600  | 589  | 573  | 563  | 558  | 557  | 557  | 557  | 557  | 557  |
| IPI = 24-59 | 1163 | 1115 | 1077 | 1041 | 1041 | 1040 | 1039 | 1037 | 1037 | 1037 |

E-Figure 1.77: Morocco (2003/4)

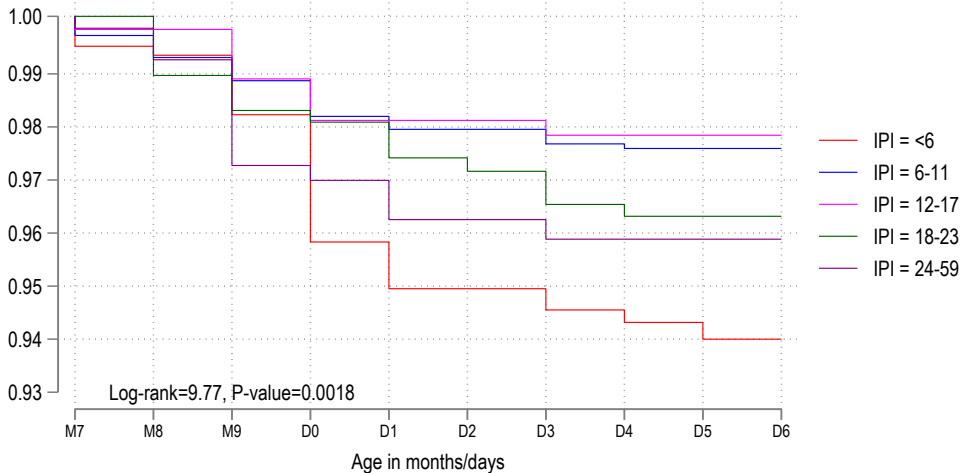

Number at risk

|             |     |     |     |     |     |     |     |     |     |     |
|-------------|-----|-----|-----|-----|-----|-----|-----|-----|-----|-----|
| IPI = <6    | 354 | 350 | 343 | 335 | 327 | 324 | 324 | 323 | 322 | 321 |
| IPI = 6-11  | 399 | 387 | 376 | 371 | 369 | 368 | 368 | 367 | 367 | 367 |
| IPI = 12-17 | 440 | 435 | 424 | 411 | 408 | 408 | 408 | 406 | 406 | 406 |
| IPI = 18-23 | 344 | 335 | 324 | 320 | 319 | 317 | 316 | 314 | 313 | 313 |
| IPI = 24-59 | 946 | 916 | 878 | 840 | 838 | 831 | 831 | 828 | 828 | 828 |

E-Figure 1.78: Türkiye (2003/4)

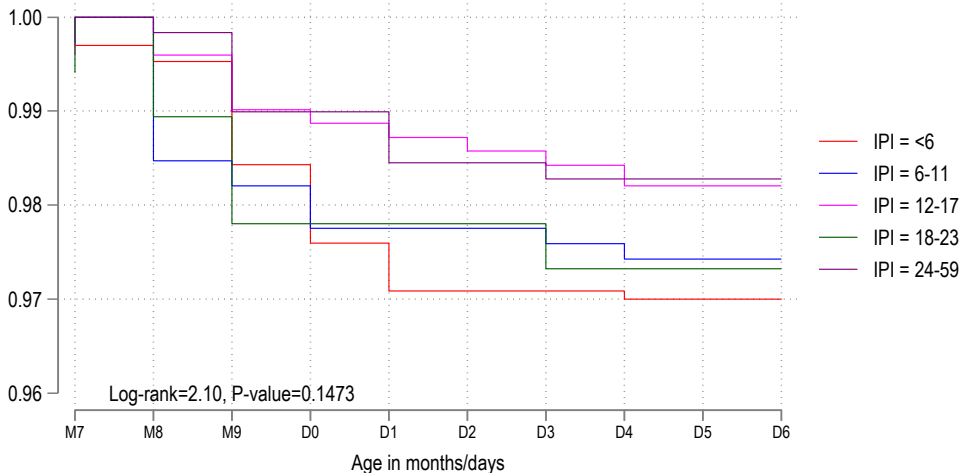

Number at risk

|             |     |     |     |     |     |     |     |     |     |     |
|-------------|-----|-----|-----|-----|-----|-----|-----|-----|-----|-----|
| IPI = <6    | 390 | 378 | 373 | 368 | 364 | 363 | 363 | 363 | 362 | 362 |
| IPI = 6-11  | 379 | 371 | 359 | 358 | 356 | 356 | 356 | 356 | 355 | 355 |
| IPI = 12-17 | 410 | 399 | 394 | 390 | 390 | 389 | 388 | 388 | 387 | 387 |
| IPI = 18-23 | 252 | 248 | 240 | 238 | 238 | 238 | 238 | 238 | 236 | 236 |
| IPI = 24-59 | 381 | 367 | 355 | 344 | 344 | 342 | 342 | 342 | 342 | 342 |



E-Figure 1.79: Yemen (2013)

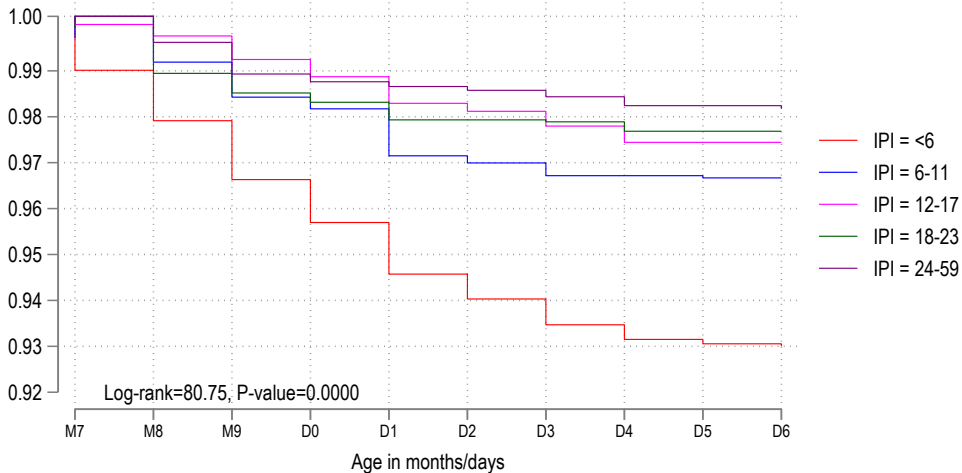

Number at risk

|             |      |      |      |      |      |      |      |      |      |      |
|-------------|------|------|------|------|------|------|------|------|------|------|
| IPI = <6    | 1591 | 1554 | 1504 | 1466 | 1452 | 1434 | 1426 | 1418 | 1413 | 1411 |
| IPI = 6-11  | 1749 | 1709 | 1651 | 1629 | 1625 | 1608 | 1605 | 1601 | 1601 | 1600 |
| IPI = 12-17 | 1927 | 1892 | 1851 | 1823 | 1816 | 1805 | 1802 | 1796 | 1789 | 1789 |
| IPI = 18-23 | 1192 | 1149 | 1098 | 1080 | 1078 | 1074 | 1074 | 1074 | 1071 | 1071 |
| IPI = 24-59 | 2021 | 1951 | 1854 | 1793 | 1790 | 1788 | 1786 | 1784 | 1780 | 1780 |

E-Figure 1.80: Bangladesh (2004)

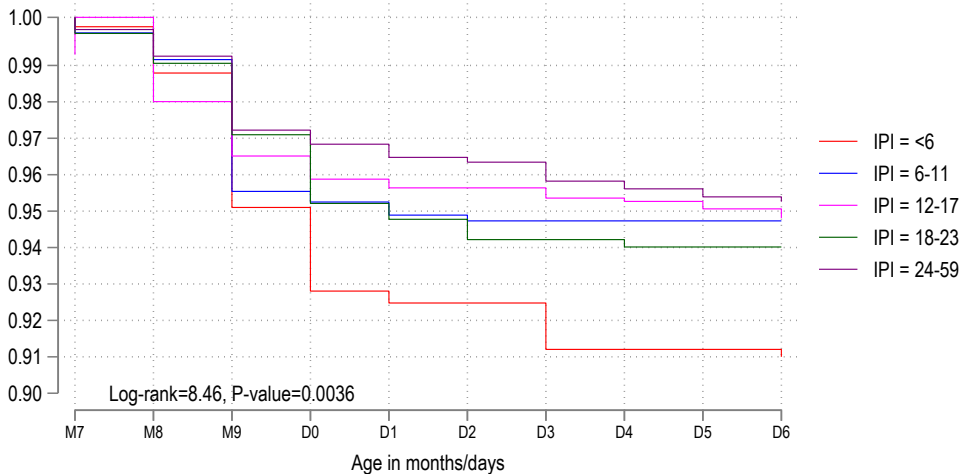

Number at risk

|             |     |     |     |     |     |     |     |     |     |     |
|-------------|-----|-----|-----|-----|-----|-----|-----|-----|-----|-----|
| IPI = <6    | 360 | 353 | 342 | 324 | 316 | 315 | 315 | 311 | 311 | 311 |
| IPI = 6-11  | 435 | 426 | 418 | 397 | 396 | 394 | 393 | 393 | 393 | 393 |
| IPI = 12-17 | 654 | 642 | 627 | 613 | 609 | 607 | 607 | 605 | 605 | 603 |
| IPI = 18-23 | 417 | 407 | 392 | 381 | 374 | 372 | 370 | 370 | 369 | 369 |
| IPI = 24-59 | 943 | 919 | 875 | 842 | 839 | 836 | 834 | 830 | 828 | 826 |

E-Figure 1.81: Bangladesh (2007)

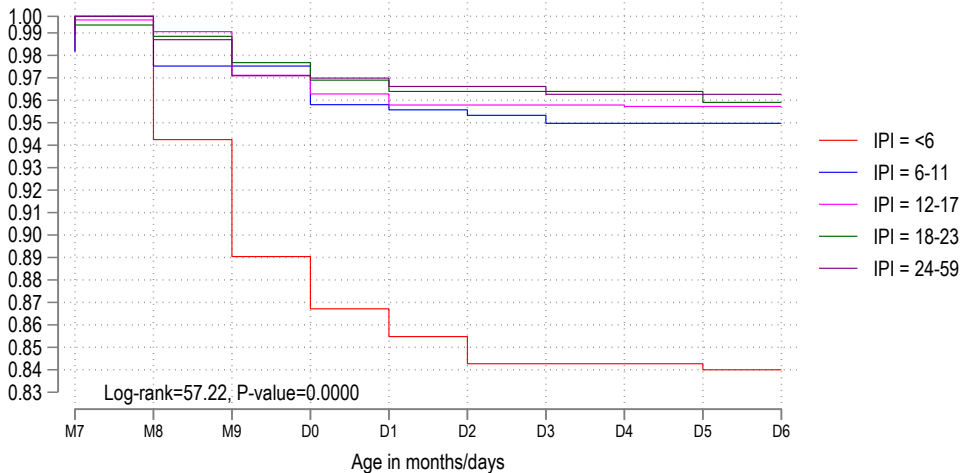

Number at risk

|             |     |     |     |     |     |     |     |     |     |     |
|-------------|-----|-----|-----|-----|-----|-----|-----|-----|-----|-----|
| IPI = <6    | 247 | 241 | 227 | 213 | 208 | 205 | 202 | 202 | 202 | 201 |
| IPI = 6-11  | 275 | 268 | 263 | 261 | 256 | 256 | 255 | 254 | 254 | 254 |
| IPI = 12-17 | 389 | 382 | 371 | 360 | 357 | 355 | 355 | 355 | 355 | 355 |
| IPI = 18-23 | 265 | 260 | 249 | 245 | 243 | 241 | 241 | 241 | 241 | 240 |
| IPI = 24-59 | 594 | 554 | 525 | 510 | 510 | 508 | 508 | 506 | 506 | 506 |

E-Figure 1.82: Bangladesh (2011)

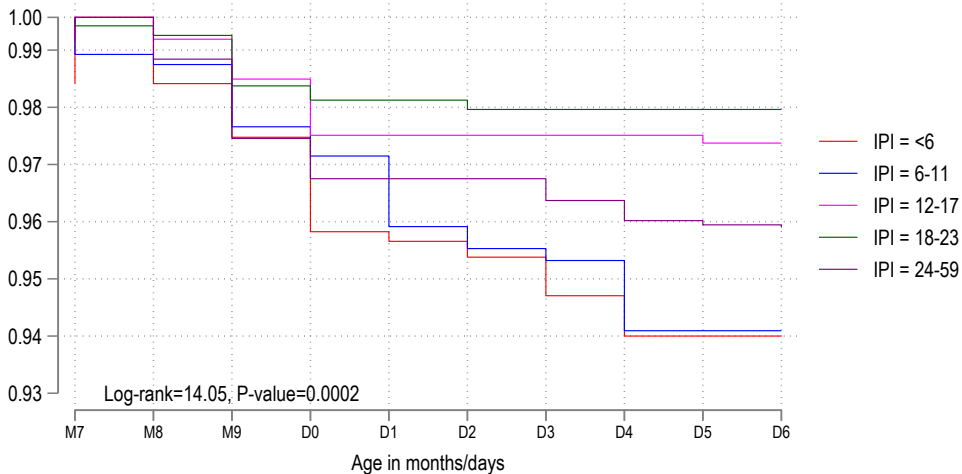

Number at risk

|             |     |     |     |     |     |     |     |     |     |     |
|-------------|-----|-----|-----|-----|-----|-----|-----|-----|-----|-----|
| IPI = <6    | 325 | 311 | 303 | 300 | 295 | 295 | 294 | 292 | 290 | 290 |
| IPI = 6-11  | 396 | 380 | 373 | 364 | 362 | 357 | 356 | 355 | 350 | 350 |
| IPI = 12-17 | 472 | 464 | 453 | 446 | 441 | 441 | 441 | 441 | 441 | 441 |
| IPI = 18-23 | 392 | 386 | 374 | 368 | 367 | 367 | 366 | 366 | 366 | 366 |
| IPI = 24-59 | 940 | 899 | 840 | 818 | 812 | 812 | 812 | 809 | 806 | 805 |

E-Figure 1.83: Bangladesh (2014)

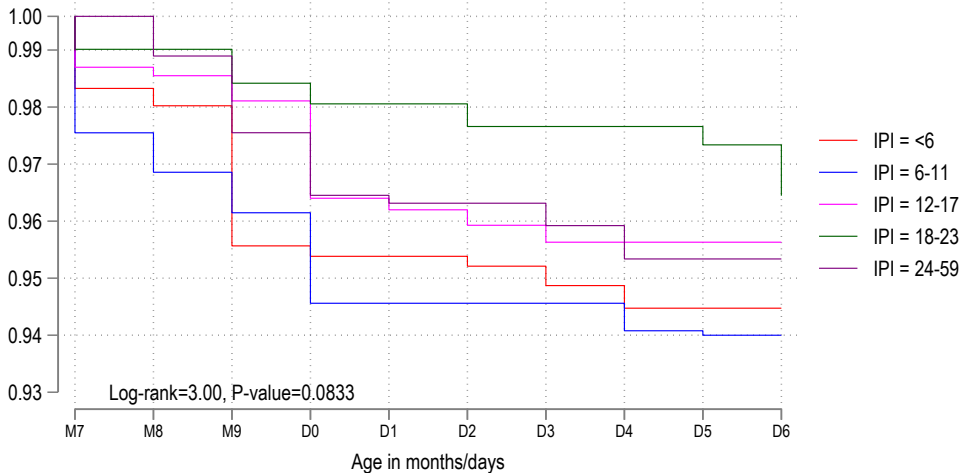

Number at risk

|             |     |     |     |     |     |     |     |     |     |     |
|-------------|-----|-----|-----|-----|-----|-----|-----|-----|-----|-----|
| IPI = <6    | 284 | 276 | 274 | 267 | 266 | 266 | 266 | 265 | 264 | 264 |
| IPI = 6-11  | 319 | 306 | 294 | 290 | 285 | 285 | 285 | 285 | 283 | 283 |
| IPI = 12-17 | 391 | 380 | 372 | 366 | 359 | 359 | 358 | 357 | 357 | 357 |
| IPI = 18-23 | 312 | 304 | 297 | 287 | 286 | 286 | 285 | 285 | 285 | 284 |
| IPI = 24-59 | 683 | 645 | 600 | 585 | 578 | 577 | 577 | 575 | 572 | 572 |

E-Figure 1.84: Bangladesh (2017/18)

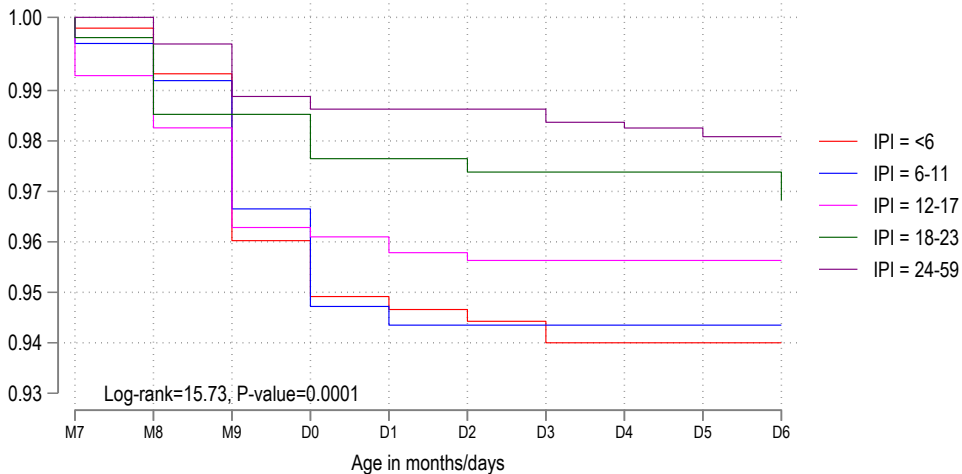

Number at risk

|             |     |     |     |     |     |     |     |     |     |     |
|-------------|-----|-----|-----|-----|-----|-----|-----|-----|-----|-----|
| IPI = <6    | 335 | 328 | 323 | 310 | 307 | 306 | 305 | 304 | 304 | 304 |
| IPI = 6-11  | 364 | 358 | 345 | 334 | 327 | 326 | 326 | 326 | 326 | 326 |
| IPI = 12-17 | 406 | 389 | 374 | 366 | 366 | 365 | 364 | 364 | 364 | 364 |
| IPI = 18-23 | 318 | 309 | 298 | 298 | 296 | 296 | 295 | 295 | 295 | 295 |
| IPI = 24-59 | 966 | 928 | 883 | 865 | 863 | 863 | 863 | 860 | 859 | 858 |

E-Figure 1.85: Cambodia (2010/11)

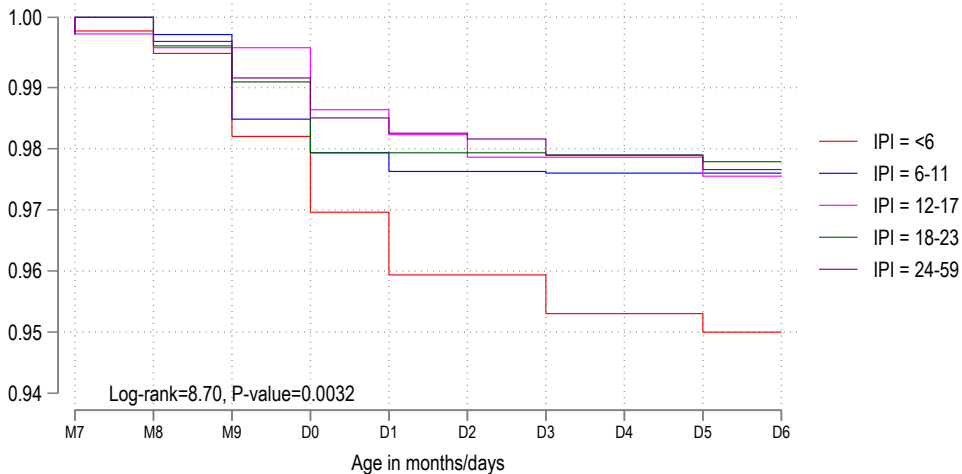

Number at risk

|             |     |     |     |     |     |     |     |     |     |     |
|-------------|-----|-----|-----|-----|-----|-----|-----|-----|-----|-----|
| IPI = <6    | 414 | 409 | 401 | 391 | 386 | 382 | 382 | 380 | 380 | 379 |
| IPI = 6-11  | 522 | 515 | 505 | 484 | 481 | 480 | 480 | 480 | 480 | 480 |
| IPI = 12-17 | 681 | 658 | 644 | 631 | 625 | 622 | 620 | 620 | 620 | 618 |
| IPI = 18-23 | 514 | 502 | 492 | 484 | 478 | 478 | 478 | 478 | 478 | 477 |
| IPI = 24-59 | 931 | 898 | 854 | 835 | 830 | 828 | 827 | 825 | 825 | 823 |

E-Figure 1.86: India (2005/6)

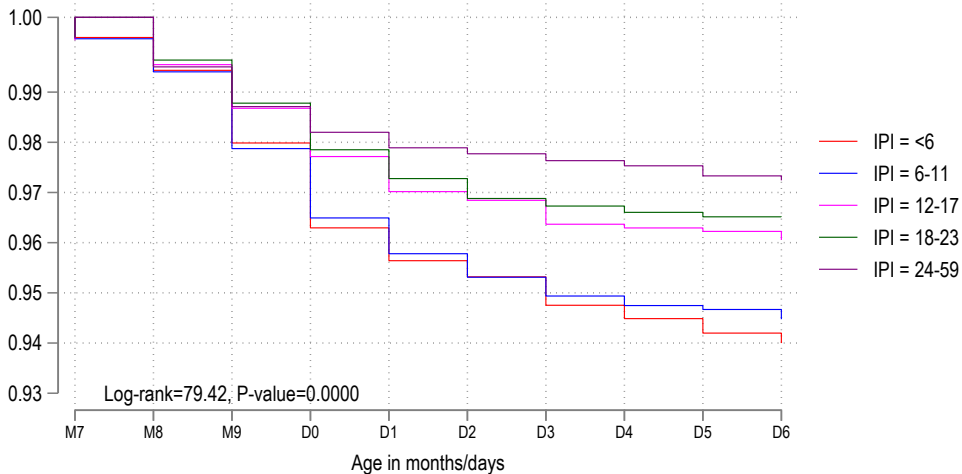

Number at risk

|             |      |      |      |      |      |      |      |      |      |      |
|-------------|------|------|------|------|------|------|------|------|------|------|
| IPI = <6    | 3832 | 3762 | 3686 | 3578 | 3516 | 3492 | 3481 | 3460 | 3450 | 3439 |
| IPI = 6-11  | 5082 | 4986 | 4872 | 4719 | 4652 | 4618 | 4595 | 4577 | 4568 | 4563 |
| IPI = 12-17 | 6744 | 6606 | 6471 | 6312 | 6250 | 6205 | 6194 | 6164 | 6159 | 6151 |
| IPI = 18-23 | 4402 | 4282 | 4173 | 4025 | 3987 | 3963 | 3947 | 3941 | 3936 | 3932 |
| IPI = 24-59 | 6720 | 6496 | 6281 | 6057 | 6026 | 6007 | 5999 | 5991 | 5985 | 5972 |



E-Figure 1.87: India (2015/16)

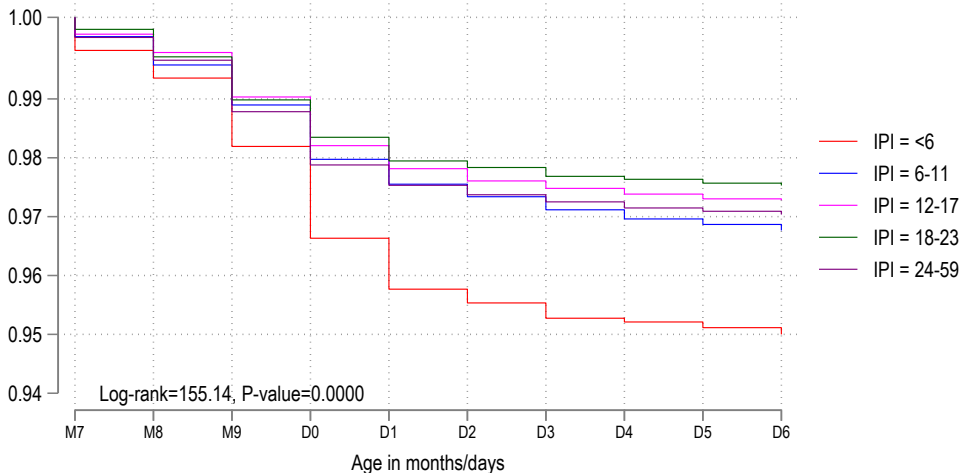

Number at risk

|             |       |       |       |       |       |       |       |       |       |       |
|-------------|-------|-------|-------|-------|-------|-------|-------|-------|-------|-------|
| IPI = <6    | 12635 | 12360 | 12103 | 11847 | 11658 | 11553 | 11525 | 11494 | 11486 | 11472 |
| IPI = 6-11  | 18385 | 17972 | 17531 | 17230 | 17069 | 16995 | 16958 | 16919 | 16892 | 16874 |
| IPI = 12-17 | 22810 | 22298 | 21718 | 21335 | 21156 | 21071 | 21027 | 20999 | 20978 | 20959 |
| IPI = 18-23 | 14979 | 14609 | 14195 | 13918 | 13829 | 13772 | 13756 | 13735 | 13728 | 13719 |
| IPI = 24-59 | 20390 | 19561 | 18684 | 18123 | 17957 | 17893 | 17863 | 17841 | 17822 | 17810 |

E-Figure 1.88: India (2019/21)

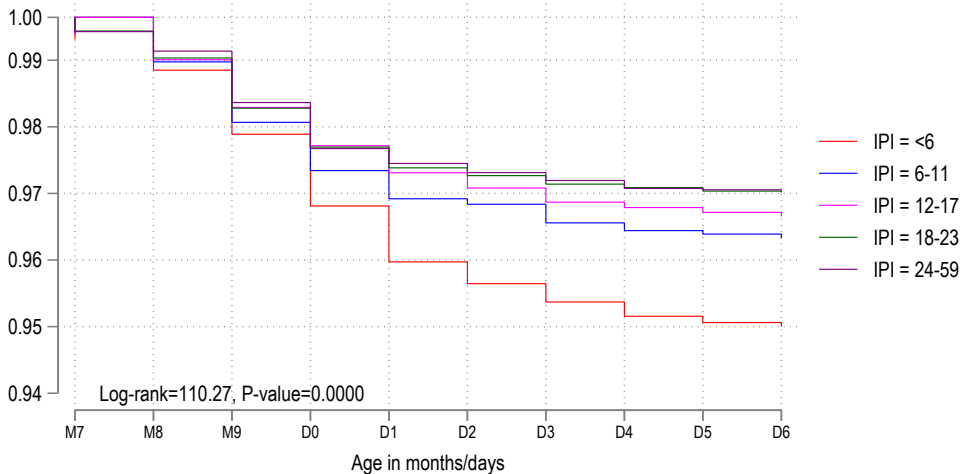

Number at risk

|             |       |       |       |       |       |       |       |       |       |       |
|-------------|-------|-------|-------|-------|-------|-------|-------|-------|-------|-------|
| IPI = <6    | 10432 | 10261 | 10029 | 9835  | 9728  | 9643  | 9611  | 9583  | 9562  | 9552  |
| IPI = 6-11  | 17441 | 17107 | 16700 | 16386 | 16266 | 16195 | 16182 | 16135 | 16116 | 16107 |
| IPI = 12-17 | 20988 | 20563 | 20135 | 19796 | 19681 | 19599 | 19553 | 19511 | 19494 | 19479 |
| IPI = 18-23 | 14405 | 14075 | 13697 | 13452 | 13372 | 13330 | 13314 | 13296 | 13289 | 13282 |
| IPI = 24-59 | 22898 | 22069 | 21203 | 20645 | 20501 | 20454 | 20425 | 20400 | 20375 | 20371 |

E-Figure 1.89: Indonesia (2002/3)

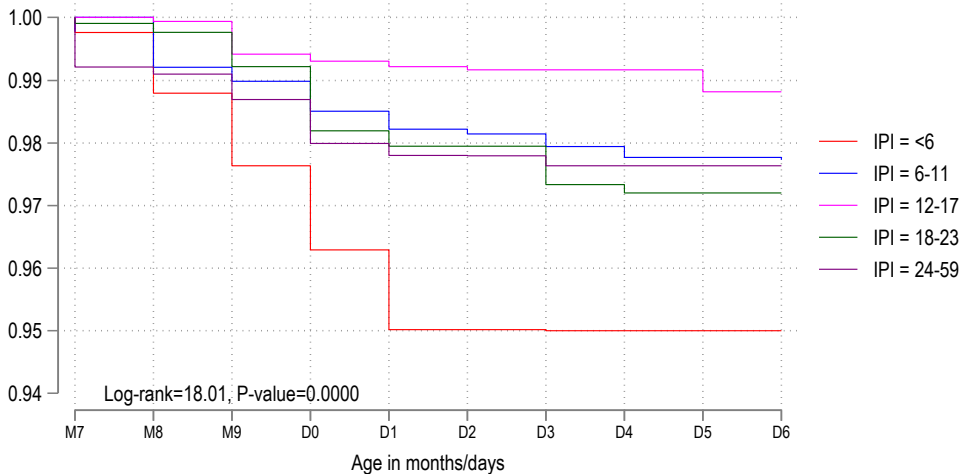

Number at risk

|             |      |      |      |      |      |      |      |      |      |      |
|-------------|------|------|------|------|------|------|------|------|------|------|
| IPI = <6    | 492  | 483  | 470  | 450  | 444  | 438  | 438  | 438  | 438  | 438  |
| IPI = 6-11  | 683  | 675  | 662  | 657  | 654  | 652  | 652  | 650  | 649  | 649  |
| IPI = 12-17 | 811  | 790  | 780  | 761  | 761  | 760  | 760  | 760  | 760  | 757  |
| IPI = 18-23 | 578  | 567  | 552  | 542  | 537  | 535  | 535  | 532  | 531  | 531  |
| IPI = 24-59 | 1539 | 1468 | 1411 | 1370 | 1360 | 1357 | 1357 | 1355 | 1355 | 1355 |

E-Figure 1.90: Indonesia (2007)

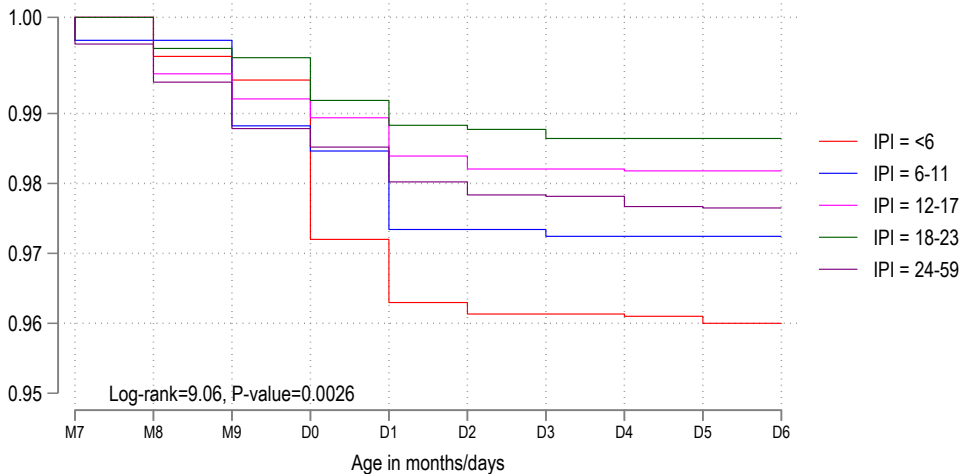

Number at risk

|             |      |      |      |      |      |      |      |      |      |      |
|-------------|------|------|------|------|------|------|------|------|------|------|
| IPI = <6    | 675  | 663  | 651  | 645  | 630  | 624  | 623  | 623  | 623  | 622  |
| IPI = 6-11  | 657  | 646  | 637  | 626  | 624  | 617  | 617  | 616  | 616  | 616  |
| IPI = 12-17 | 778  | 764  | 747  | 733  | 731  | 727  | 725  | 725  | 725  | 725  |
| IPI = 18-23 | 551  | 540  | 533  | 522  | 519  | 517  | 516  | 516  | 516  | 516  |
| IPI = 24-59 | 1294 | 1213 | 1150 | 1113 | 1110 | 1104 | 1102 | 1102 | 1100 | 1100 |

E-Figure 1.91: Indonesia (2012)

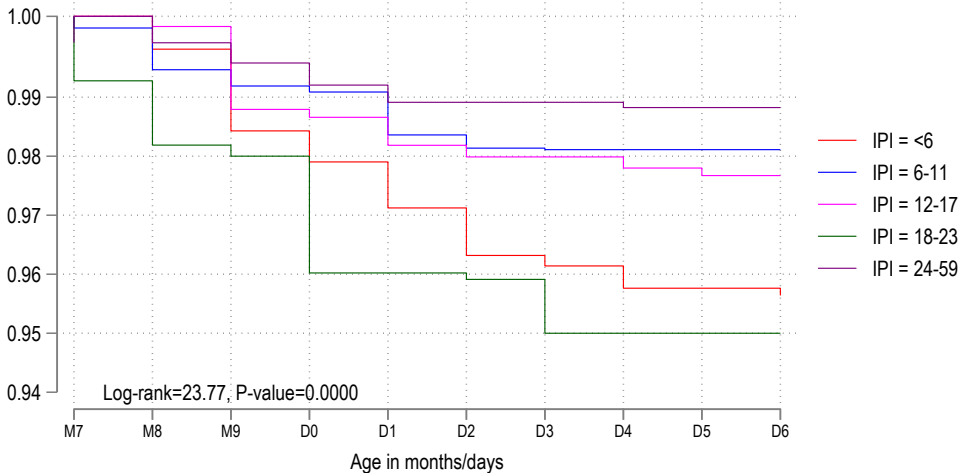

Number at risk

|             |      |      |     |     |     |     |     |     |     |     |
|-------------|------|------|-----|-----|-----|-----|-----|-----|-----|-----|
| IPI = <6    | 662  | 654  | 636 | 614 | 611 | 606 | 601 | 600 | 597 | 597 |
| IPI = 6-11  | 638  | 618  | 603 | 596 | 596 | 591 | 590 | 590 | 590 | 590 |
| IPI = 12-17 | 690  | 677  | 663 | 647 | 646 | 643 | 641 | 641 | 640 | 639 |
| IPI = 18-23 | 487  | 463  | 449 | 444 | 435 | 435 | 434 | 430 | 430 | 430 |
| IPI = 24-59 | 1121 | 1067 | 987 | 957 | 954 | 951 | 951 | 951 | 950 | 950 |

E-Figure 1.92: Indonesia (2017)

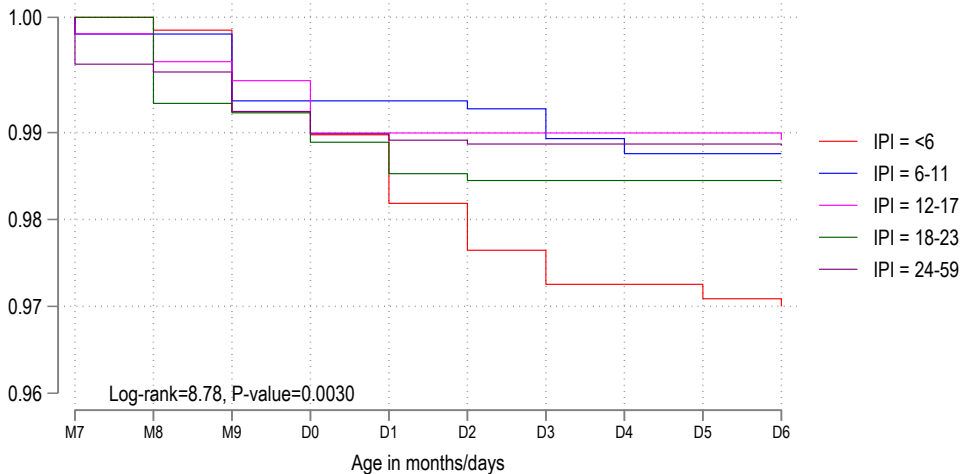

Number at risk

|             | M7   | M8   | M9   | D0   | D1   | D2   | D3   | D4   | D5   | D6   |
|-------------|------|------|------|------|------|------|------|------|------|------|
| IPI = <6    | 660  | 640  | 628  | 615  | 614  | 609  | 605  | 603  | 603  | 601  |
| IPI = 6-11  | 613  | 598  | 585  | 577  | 577  | 577  | 577  | 575  | 574  | 574  |
| IPI = 12-17 | 616  | 606  | 587  | 583  | 580  | 580  | 580  | 580  | 580  | 580  |
| IPI = 18-23 | 494  | 485  | 465  | 460  | 459  | 457  | 457  | 457  | 457  | 457  |
| IPI = 24-59 | 1396 | 1332 | 1247 | 1219 | 1216 | 1215 | 1214 | 1214 | 1214 | 1214 |

E-Figure 1.93: Myanmar (2015/16)

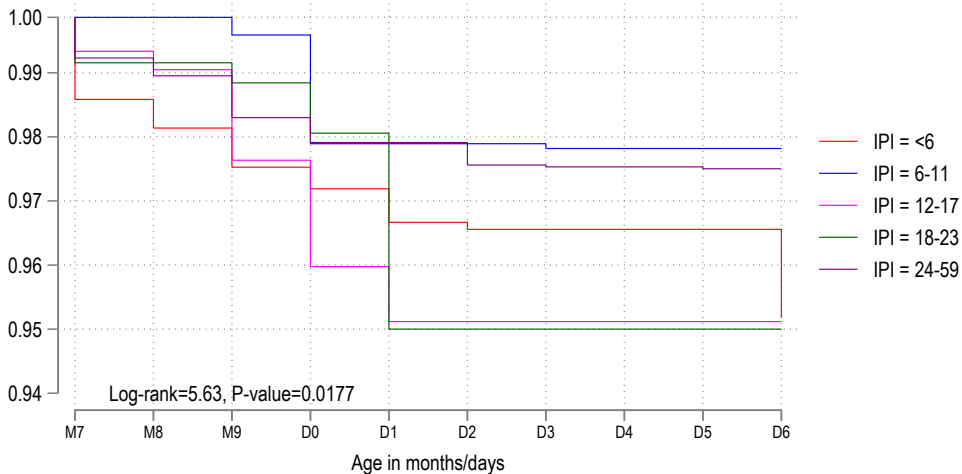

Number at risk

|             |     |     |     |     |     |     |     |     |     |     |
|-------------|-----|-----|-----|-----|-----|-----|-----|-----|-----|-----|
| IPI = <6    | 127 | 124 | 121 | 121 | 120 | 120 | 120 | 120 | 120 | 120 |
| IPI = 6-11  | 190 | 185 | 182 | 181 | 178 | 178 | 178 | 178 | 178 | 178 |
| IPI = 12-17 | 268 | 265 | 258 | 253 | 249 | 247 | 247 | 247 | 247 | 247 |
| IPI = 18-23 | 186 | 184 | 181 | 179 | 178 | 172 | 172 | 172 | 172 | 172 |
| IPI = 24-59 | 510 | 493 | 472 | 459 | 457 | 457 | 455 | 455 | 455 | 455 |

E-Figure 1.94: Nepal (2006)

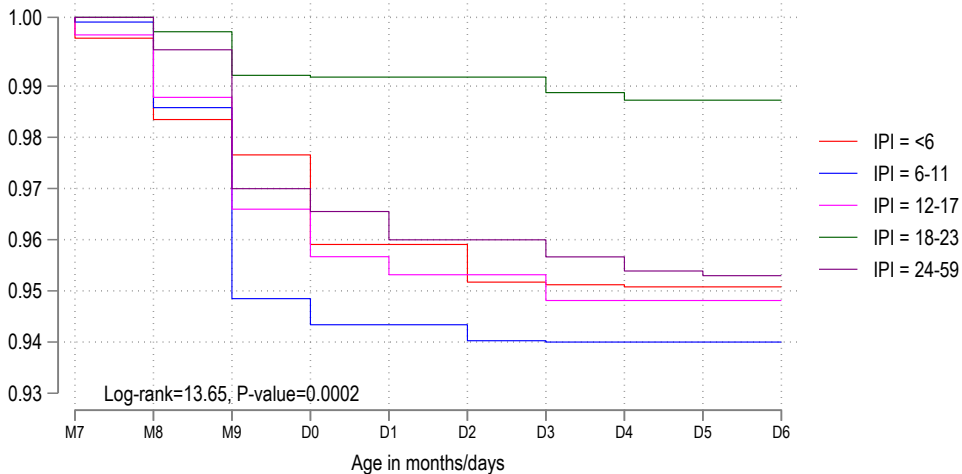

Number at risk

|             |     |     |     |     |     |     |     |     |     |     |
|-------------|-----|-----|-----|-----|-----|-----|-----|-----|-----|-----|
| IPI = <6    | 236 | 234 | 223 | 219 | 215 | 215 | 214 | 214 | 214 | 214 |
| IPI = 6-11  | 415 | 411 | 399 | 382 | 380 | 380 | 379 | 379 | 379 | 379 |
| IPI = 12-17 | 671 | 661 | 645 | 627 | 621 | 619 | 619 | 616 | 616 | 616 |
| IPI = 18-23 | 484 | 478 | 471 | 460 | 460 | 460 | 460 | 458 | 458 | 458 |
| IPI = 24-59 | 797 | 775 | 739 | 708 | 705 | 701 | 701 | 698 | 696 | 696 |



E-Figure 1.95: Nepal (2011)

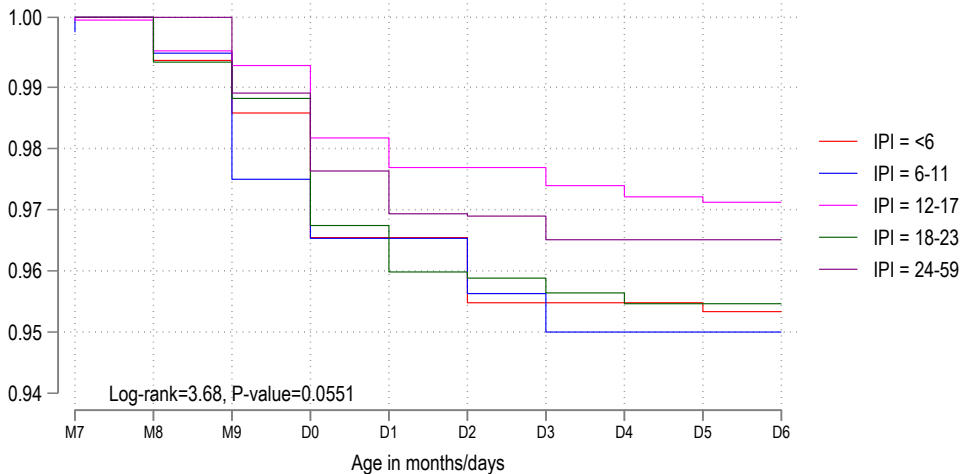

Number at risk

|             | M7  | M8  | M9  | D0  | D1  | D2  | D3  | D4  | D5  | D6  |
|-------------|-----|-----|-----|-----|-----|-----|-----|-----|-----|-----|
| IPI = <6    | 247 | 243 | 237 | 232 | 227 | 227 | 225 | 225 | 225 | 225 |
| IPI = 6-11  | 349 | 343 | 334 | 326 | 322 | 322 | 319 | 317 | 317 | 317 |
| IPI = 12-17 | 589 | 580 | 573 | 565 | 559 | 556 | 556 | 554 | 553 | 553 |
| IPI = 18-23 | 349 | 343 | 332 | 327 | 320 | 317 | 317 | 316 | 316 | 316 |
| IPI = 24-59 | 696 | 681 | 660 | 643 | 635 | 630 | 630 | 627 | 627 | 627 |

E-Figure 1.96: Nepal (2016/17)

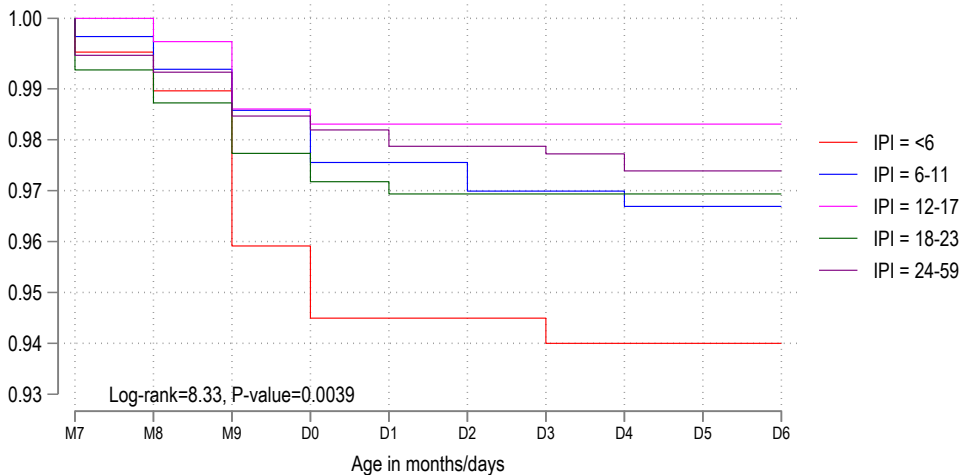

Number at risk

|             |     |     |     |     |     |     |     |     |     |     |
|-------------|-----|-----|-----|-----|-----|-----|-----|-----|-----|-----|
| IPI = <6    | 243 | 240 | 236 | 228 | 225 | 225 | 225 | 224 | 224 | 224 |
| IPI = 6-11  | 331 | 324 | 317 | 312 | 309 | 309 | 307 | 307 | 306 | 306 |
| IPI = 12-17 | 364 | 358 | 338 | 332 | 331 | 331 | 331 | 331 | 331 | 331 |
| IPI = 18-23 | 284 | 277 | 266 | 263 | 262 | 261 | 261 | 261 | 261 | 261 |
| IPI = 24-59 | 504 | 483 | 457 | 445 | 444 | 442 | 442 | 442 | 440 | 440 |

E-Figure 1.97: Nepal (2021/22)

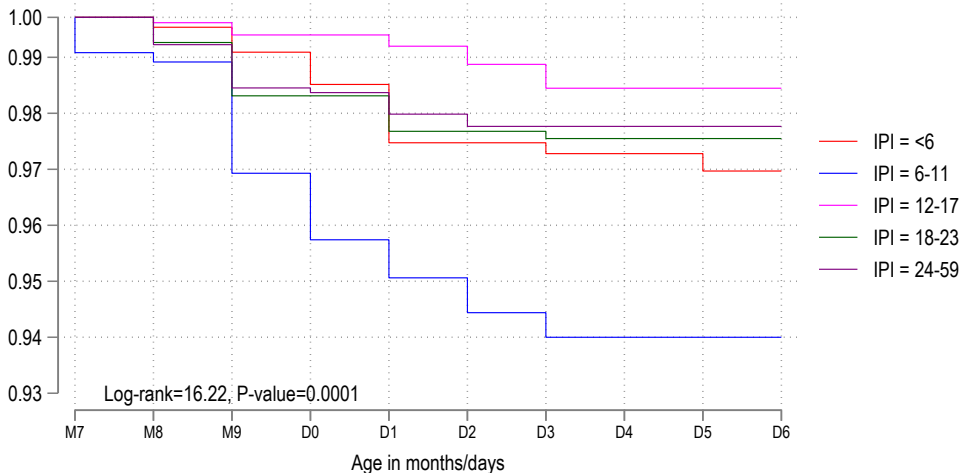

Number at risk

|             |     |     |     |     |     |     |     |     |     |     |
|-------------|-----|-----|-----|-----|-----|-----|-----|-----|-----|-----|
| IPI = <6    | 235 | 232 | 230 | 228 | 227 | 225 | 225 | 224 | 224 | 223 |
| IPI = 6-11  | 331 | 323 | 320 | 308 | 304 | 302 | 300 | 299 | 299 | 299 |
| IPI = 12-17 | 425 | 421 | 412 | 408 | 408 | 407 | 406 | 404 | 404 | 404 |
| IPI = 18-23 | 290 | 282 | 275 | 268 | 268 | 266 | 266 | 266 | 266 | 266 |
| IPI = 24-59 | 517 | 496 | 474 | 464 | 464 | 462 | 461 | 461 | 461 | 461 |

E-Figure 1.98: Pakistan (2012/13)

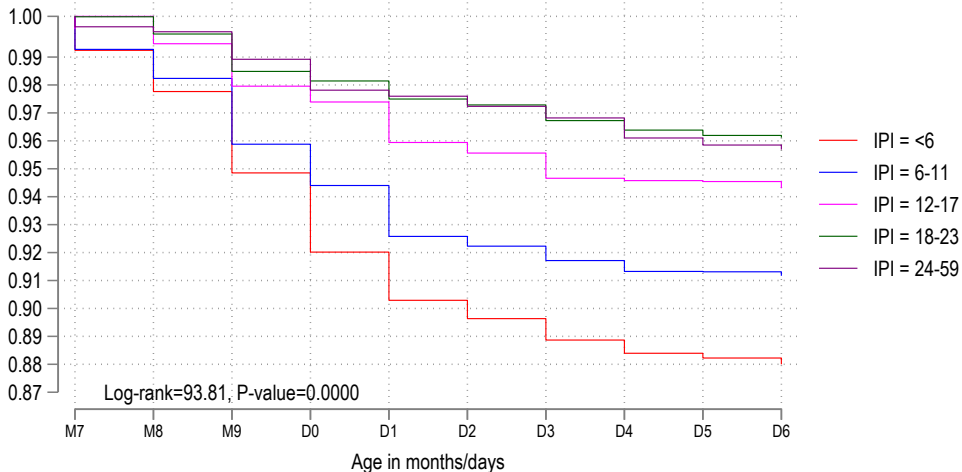

Number at risk

|             |      |      |      |      |      |      |      |      |      |      |
|-------------|------|------|------|------|------|------|------|------|------|------|
| IPI = <6    | 1485 | 1453 | 1408 | 1356 | 1315 | 1290 | 1281 | 1270 | 1263 | 1260 |
| IPI = 6-11  | 1697 | 1634 | 1577 | 1537 | 1513 | 1484 | 1478 | 1470 | 1463 | 1463 |
| IPI = 12-17 | 1680 | 1655 | 1604 | 1574 | 1565 | 1542 | 1536 | 1521 | 1520 | 1519 |
| IPI = 18-23 | 1100 | 1058 | 1031 | 1009 | 1005 | 999  | 996  | 991  | 987  | 985  |
| IPI = 24-59 | 1476 | 1410 | 1345 | 1316 | 1302 | 1299 | 1294 | 1288 | 1279 | 1275 |

E-Figure 1.99: Pakistan (2017/18)

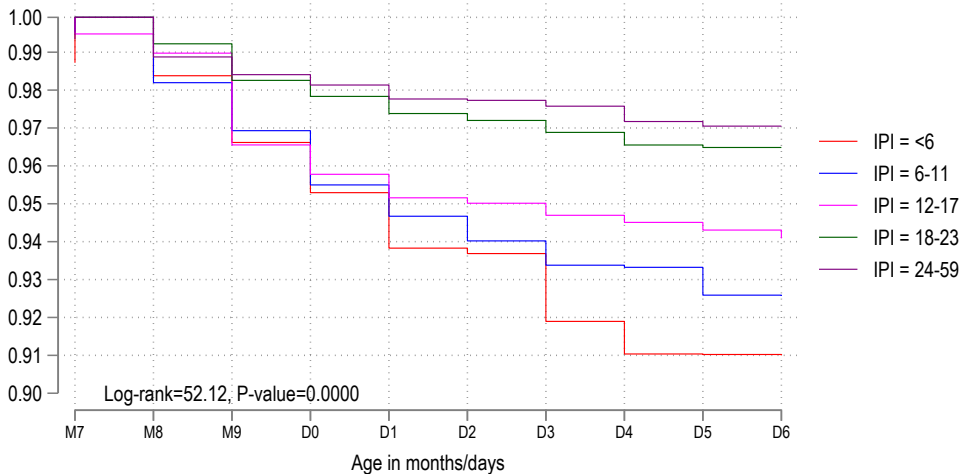

Number at risk

|             |      |      |      |      |      |      |      |      |      |      |
|-------------|------|------|------|------|------|------|------|------|------|------|
| IPI = <6    | 1179 | 1159 | 1136 | 1115 | 1099 | 1083 | 1081 | 1060 | 1050 | 1050 |
| IPI = 6-11  | 1410 | 1373 | 1335 | 1314 | 1295 | 1284 | 1275 | 1266 | 1265 | 1255 |
| IPI = 12-17 | 1382 | 1360 | 1334 | 1294 | 1284 | 1275 | 1273 | 1269 | 1267 | 1264 |
| IPI = 18-23 | 879  | 854  | 821  | 808  | 805  | 801  | 800  | 797  | 794  | 794  |
| IPI = 24-59 | 1263 | 1216 | 1150 | 1141 | 1138 | 1133 | 1133 | 1131 | 1127 | 1125 |

E-Figure 1.100: Philippines (2003)

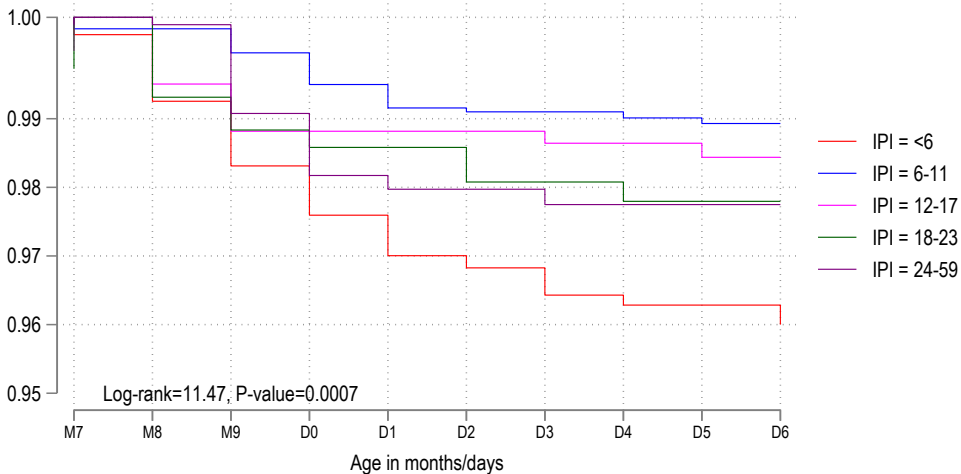

Number at risk

|             |     |     |     |     |     |     |     |     |     |     |
|-------------|-----|-----|-----|-----|-----|-----|-----|-----|-----|-----|
| IPI = <6    | 543 | 532 | 524 | 516 | 512 | 509 | 508 | 506 | 505 | 505 |
| IPI = 6-11  | 753 | 739 | 726 | 711 | 707 | 705 | 705 | 705 | 704 | 703 |
| IPI = 12-17 | 707 | 684 | 665 | 654 | 654 | 654 | 654 | 653 | 653 | 651 |
| IPI = 18-23 | 437 | 423 | 409 | 406 | 405 | 405 | 403 | 403 | 402 | 402 |
| IPI = 24-59 | 574 | 553 | 527 | 507 | 502 | 501 | 501 | 500 | 500 | 500 |

E-Figure 1.101: Philippines (2022)

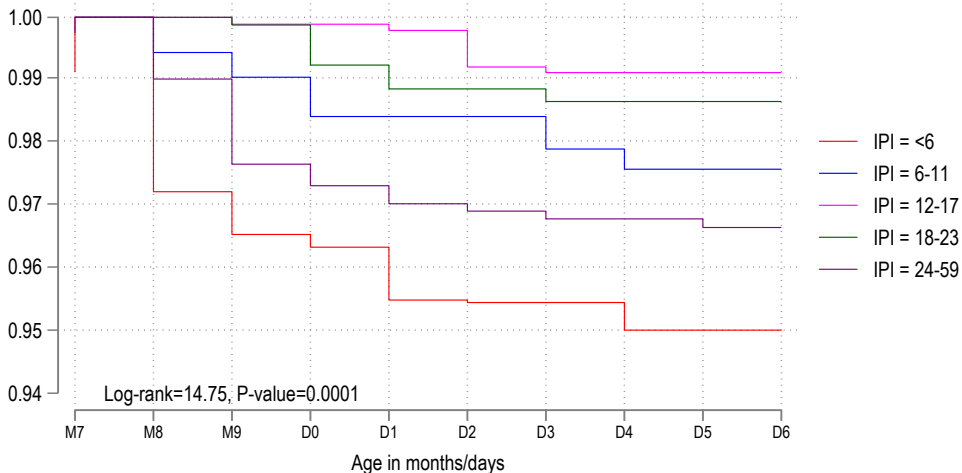

Number at risk

|             |     |     |     |     |     |     |     |     |     |     |
|-------------|-----|-----|-----|-----|-----|-----|-----|-----|-----|-----|
| IPI = <6    | 305 | 301 | 289 | 287 | 286 | 284 | 284 | 284 | 282 | 282 |
| IPI = 6-11  | 405 | 403 | 392 | 390 | 387 | 387 | 387 | 385 | 384 | 384 |
| IPI = 12-17 | 414 | 406 | 400 | 399 | 399 | 398 | 396 | 396 | 396 | 396 |
| IPI = 18-23 | 290 | 284 | 281 | 281 | 279 | 278 | 278 | 278 | 278 | 278 |
| IPI = 24-59 | 570 | 536 | 504 | 488 | 486 | 485 | 484 | 483 | 483 | 483 |

E-Figure 1.102: Timor-Leste (2009/10)

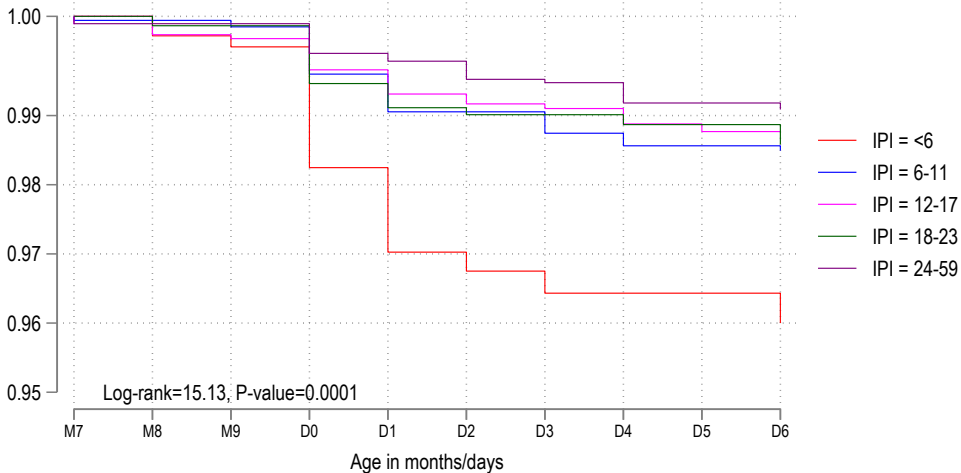

Number at risk

|             | M7   | M8   | M9   | D0   | D1   | D2   | D3   | D4   | D5   | D6   |
|-------------|------|------|------|------|------|------|------|------|------|------|
| IPI = <6    | 367  | 363  | 359  | 355  | 349  | 345  | 344  | 343  | 343  | 343  |
| IPI = 6-11  | 989  | 979  | 965  | 958  | 951  | 946  | 946  | 943  | 941  | 941  |
| IPI = 12-17 | 1655 | 1629 | 1593 | 1589 | 1582 | 1576 | 1574 | 1573 | 1569 | 1567 |
| IPI = 18-23 | 1148 | 1123 | 1089 | 1079 | 1070 | 1066 | 1065 | 1065 | 1064 | 1064 |
| IPI = 24-59 | 1291 | 1255 | 1220 | 1208 | 1202 | 1201 | 1198 | 1197 | 1194 | 1194 |



E-Figure 1.103: Bolivia (2003/4)

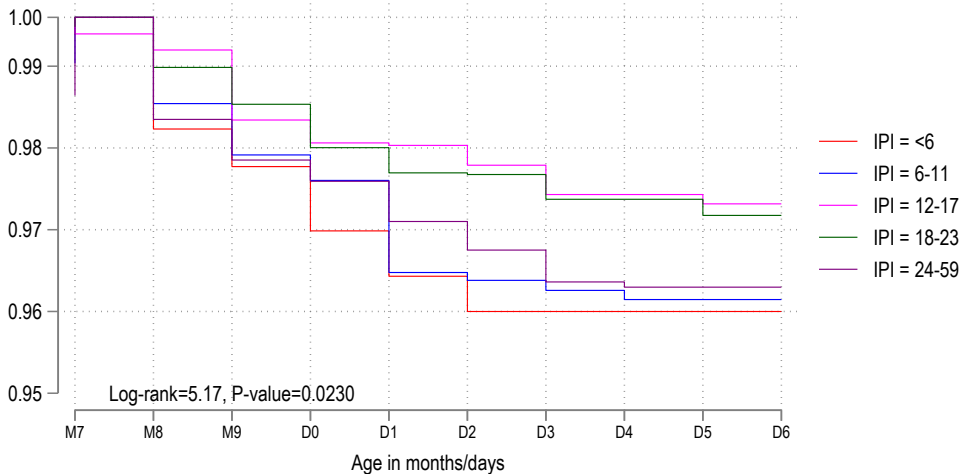

Number at risk

|             |      |      |      |      |      |      |      |      |      |      |
|-------------|------|------|------|------|------|------|------|------|------|------|
| IPI = <6    | 532  | 529  | 516  | 512  | 508  | 505  | 503  | 503  | 503  | 501  |
| IPI = 6-11  | 954  | 939  | 917  | 905  | 902  | 892  | 891  | 890  | 889  | 888  |
| IPI = 12-17 | 1339 | 1317 | 1293 | 1274 | 1270 | 1270 | 1267 | 1262 | 1262 | 1260 |
| IPI = 18-23 | 927  | 909  | 889  | 876  | 871  | 869  | 868  | 866  | 866  | 864  |
| IPI = 24-59 | 1126 | 1073 | 1026 | 1016 | 1013 | 1008 | 1005 | 1001 | 1000 | 1000 |

E-Figure 1.104: Bolivia (2008)

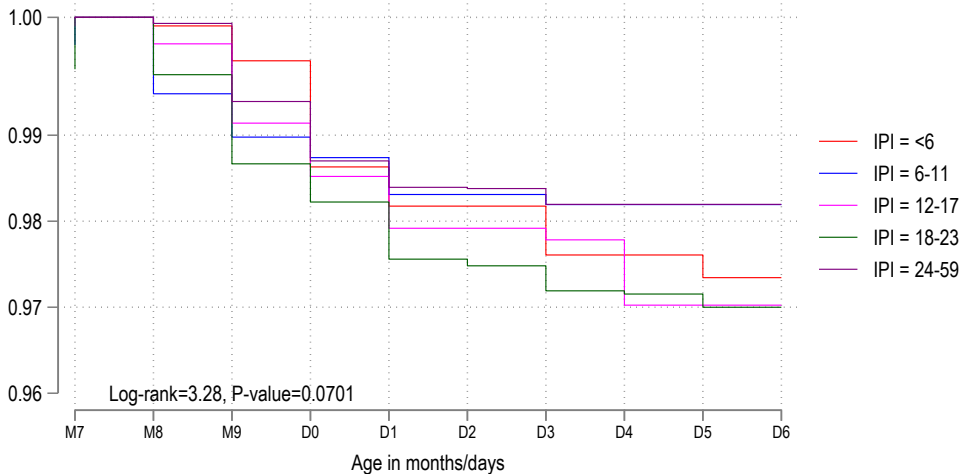

Number at risk

|             | M7  | M8  | M9  | D0  | D1  | D2  | D3  | D4  | D5  | D6  |
|-------------|-----|-----|-----|-----|-----|-----|-----|-----|-----|-----|
| IPI = <6    | 352 | 345 | 338 | 336 | 332 | 330 | 330 | 328 | 328 | 325 |
| IPI = 6-11  | 628 | 613 | 595 | 588 | 586 | 584 | 584 | 583 | 583 | 583 |
| IPI = 12-17 | 860 | 850 | 827 | 813 | 808 | 803 | 803 | 802 | 795 | 795 |
| IPI = 18-23 | 560 | 542 | 527 | 520 | 518 | 514 | 514 | 512 | 512 | 511 |
| IPI = 24-59 | 678 | 648 | 608 | 594 | 590 | 588 | 588 | 587 | 587 | 587 |

E-Figure 1.105: Colombia (2005)

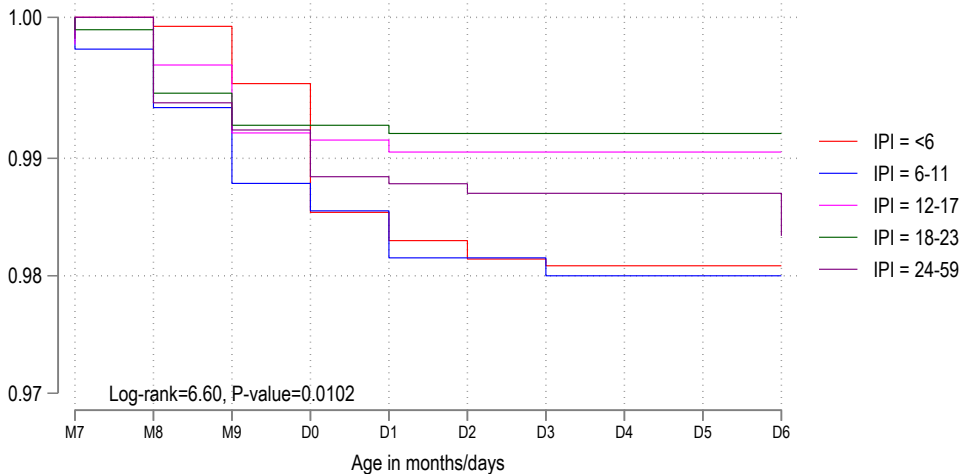

Number at risk

|             |      |      |      |      |      |      |      |      |      |      |
|-------------|------|------|------|------|------|------|------|------|------|------|
| IPI = <6    | 612  | 600  | 591  | 584  | 577  | 576  | 575  | 575  | 575  | 575  |
| IPI = 6-11  | 1085 | 1065 | 1042 | 1030 | 1028 | 1024 | 1024 | 1022 | 1022 | 1022 |
| IPI = 12-17 | 1174 | 1150 | 1127 | 1116 | 1115 | 1114 | 1114 | 1114 | 1114 | 1114 |
| IPI = 18-23 | 750  | 742  | 716  | 710  | 710  | 709  | 709  | 709  | 709  | 709  |
| IPI = 24-59 | 1433 | 1386 | 1352 | 1344 | 1338 | 1337 | 1336 | 1336 | 1336 | 1336 |

E-Figure 1.106: Dominican Republic (2002)

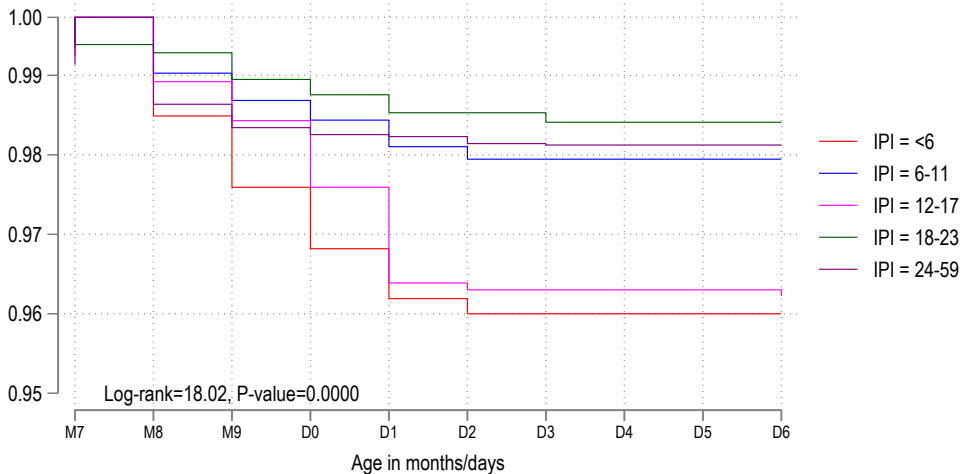

Number at risk

|             |      |      |      |      |      |      |      |      |      |      |
|-------------|------|------|------|------|------|------|------|------|------|------|
| IPI = <6    | 826  | 808  | 787  | 779  | 773  | 768  | 766  | 766  | 766  | 766  |
| IPI = 6-11  | 1113 | 1091 | 1070 | 1066 | 1063 | 1059 | 1058 | 1058 | 1058 | 1058 |
| IPI = 12-17 | 1016 | 989  | 962  | 953  | 945  | 934  | 933  | 933  | 933  | 929  |
| IPI = 18-23 | 637  | 613  | 591  | 587  | 586  | 585  | 585  | 584  | 584  | 584  |
| IPI = 24-59 | 1094 | 1046 | 993  | 980  | 979  | 979  | 978  | 978  | 978  | 978  |

E-Figure 1.107: Guatemala (2014/15)

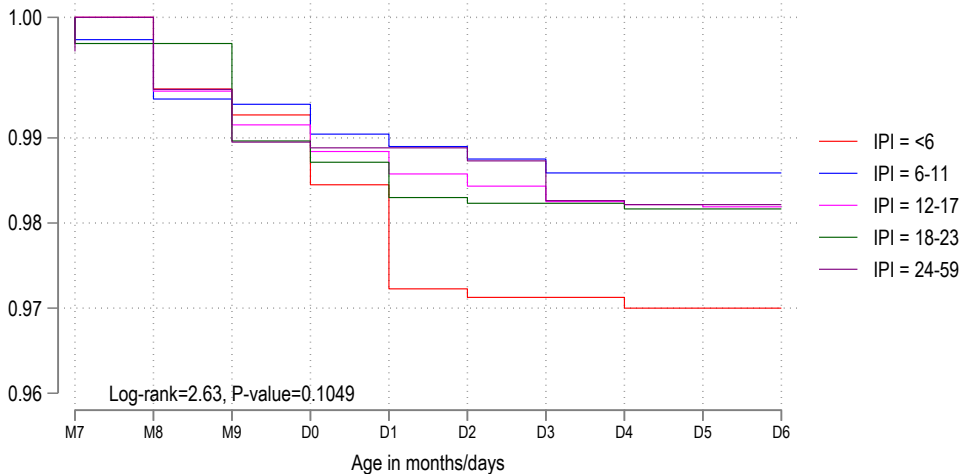

Number at risk

|             |      |      |      |      |      |      |      |      |      |      |
|-------------|------|------|------|------|------|------|------|------|------|------|
| IPI = <6    | 341  | 334  | 325  | 324  | 322  | 318  | 317  | 317  | 317  | 317  |
| IPI = 6-11  | 824  | 810  | 784  | 782  | 779  | 778  | 777  | 776  | 776  | 776  |
| IPI = 12-17 | 1300 | 1271 | 1240 | 1232 | 1228 | 1225 | 1223 | 1221 | 1221 | 1220 |
| IPI = 18-23 | 994  | 969  | 939  | 925  | 923  | 919  | 919  | 919  | 918  | 918  |
| IPI = 24-59 | 1710 | 1642 | 1558 | 1537 | 1536 | 1536 | 1534 | 1526 | 1526 | 1526 |

E-Figure 1.108: Honduras (2005/6)

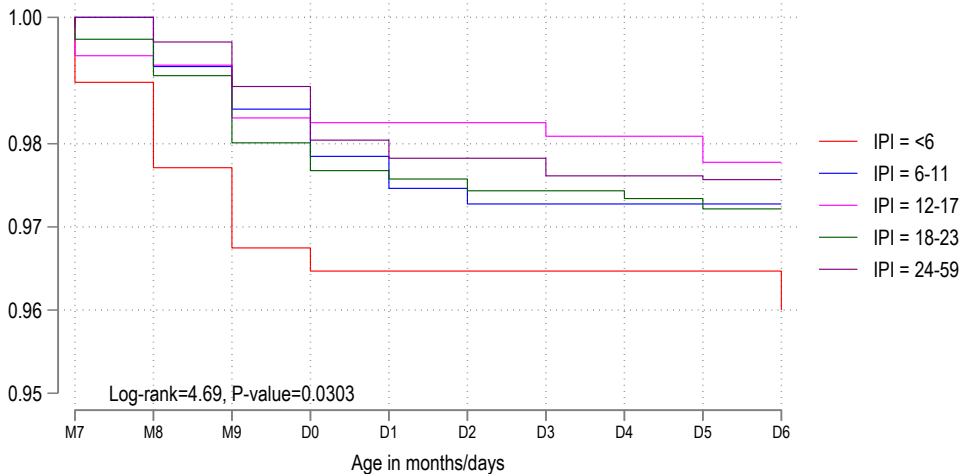

Number at risk

|             |      |      |      |      |      |      |      |      |      |      |
|-------------|------|------|------|------|------|------|------|------|------|------|
| IPI = <6    | 392  | 385  | 376  | 371  | 370  | 370  | 370  | 370  | 370  | 370  |
| IPI = 6-11  | 765  | 758  | 741  | 731  | 727  | 724  | 723  | 723  | 723  | 723  |
| IPI = 12-17 | 932  | 919  | 897  | 884  | 884  | 884  | 884  | 883  | 883  | 880  |
| IPI = 18-23 | 851  | 838  | 822  | 812  | 809  | 808  | 807  | 807  | 806  | 805  |
| IPI = 24-59 | 1465 | 1425 | 1365 | 1339 | 1330 | 1327 | 1327 | 1324 | 1324 | 1323 |

E-Figure 1.109: Honduras (2011/12)

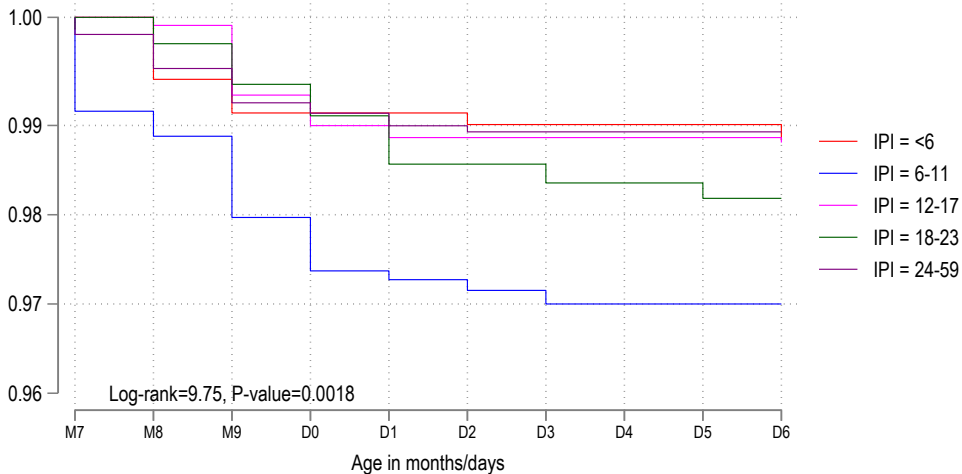

Number at risk

|             |      |      |      |      |      |      |      |      |      |      |
|-------------|------|------|------|------|------|------|------|------|------|------|
| IPI = <6    | 290  | 289  | 279  | 278  | 278  | 278  | 278  | 278  | 278  | 278  |
| IPI = 6-11  | 607  | 586  | 566  | 558  | 554  | 554  | 553  | 552  | 552  | 552  |
| IPI = 12-17 | 712  | 708  | 690  | 683  | 680  | 679  | 679  | 679  | 679  | 679  |
| IPI = 18-23 | 556  | 542  | 527  | 524  | 522  | 519  | 519  | 518  | 518  | 517  |
| IPI = 24-59 | 1284 | 1241 | 1168 | 1148 | 1147 | 1145 | 1145 | 1145 | 1145 | 1145 |

E-Figure 1.110: Nicaragua (2001)

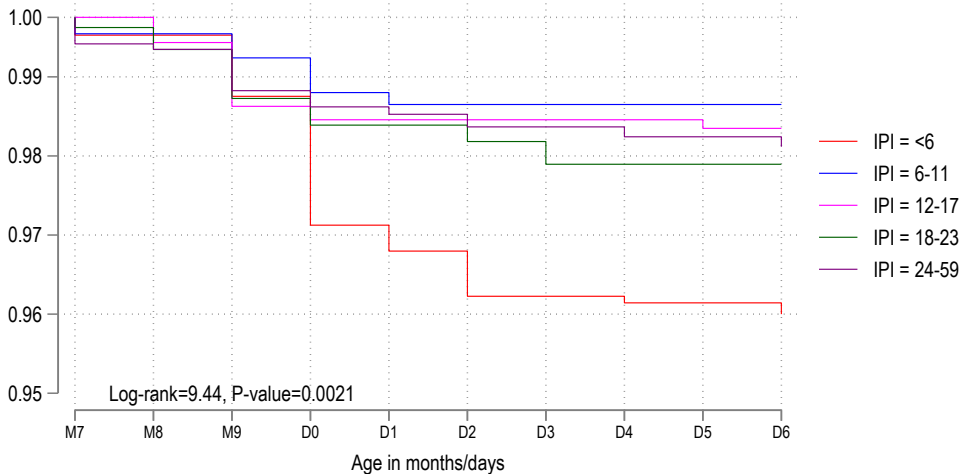

Number at risk

|             |     |     |     |     |     |     |     |     |     |     |
|-------------|-----|-----|-----|-----|-----|-----|-----|-----|-----|-----|
| IPI = <6    | 353 | 349 | 346 | 342 | 336 | 335 | 333 | 333 | 333 | 333 |
| IPI = 6-11  | 546 | 538 | 530 | 524 | 522 | 521 | 521 | 521 | 521 | 521 |
| IPI = 12-17 | 650 | 631 | 611 | 601 | 600 | 600 | 600 | 600 | 600 | 600 |
| IPI = 18-23 | 429 | 420 | 409 | 402 | 401 | 401 | 400 | 399 | 399 | 399 |
| IPI = 24-59 | 593 | 573 | 535 | 523 | 522 | 521 | 521 | 521 | 520 | 520 |



E-Figure 1.111: Peru (2000)

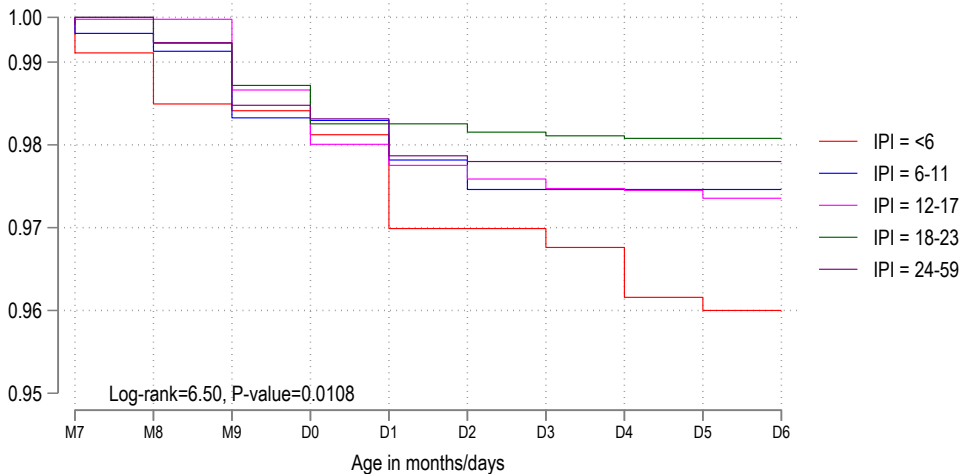

Number at risk

|             |      |      |      |      |      |      |      |      |      |      |
|-------------|------|------|------|------|------|------|------|------|------|------|
| IPI = <6    | 418  | 408  | 402  | 400  | 399  | 394  | 394  | 394  | 391  | 390  |
| IPI = 6-11  | 792  | 780  | 769  | 759  | 758  | 755  | 752  | 752  | 752  | 752  |
| IPI = 12-17 | 1031 | 1020 | 997  | 978  | 971  | 969  | 967  | 966  | 966  | 965  |
| IPI = 18-23 | 823  | 804  | 778  | 770  | 766  | 766  | 766  | 765  | 765  | 765  |
| IPI = 24-59 | 1231 | 1181 | 1116 | 1096 | 1094 | 1089 | 1089 | 1089 | 1089 | 1088 |

E-Figure 1.112: Peru (2007/8)

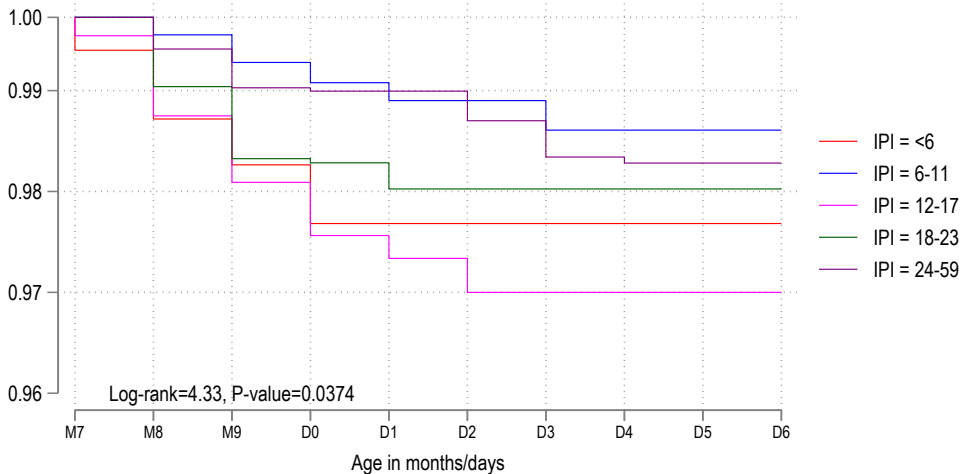

Number at risk

|             |     |     |     |     |     |     |     |     |     |     |
|-------------|-----|-----|-----|-----|-----|-----|-----|-----|-----|-----|
| IPI = <6    | 236 | 232 | 224 | 223 | 221 | 221 | 221 | 221 | 221 | 221 |
| IPI = 6-11  | 409 | 397 | 383 | 380 | 379 | 378 | 378 | 377 | 377 | 377 |
| IPI = 12-17 | 564 | 554 | 538 | 531 | 528 | 527 | 525 | 525 | 525 | 525 |
| IPI = 18-23 | 450 | 445 | 427 | 421 | 421 | 420 | 420 | 420 | 420 | 420 |
| IPI = 24-59 | 698 | 668 | 623 | 616 | 616 | 616 | 614 | 612 | 612 | 612 |

E-Figure 1.113: Peru (2009)

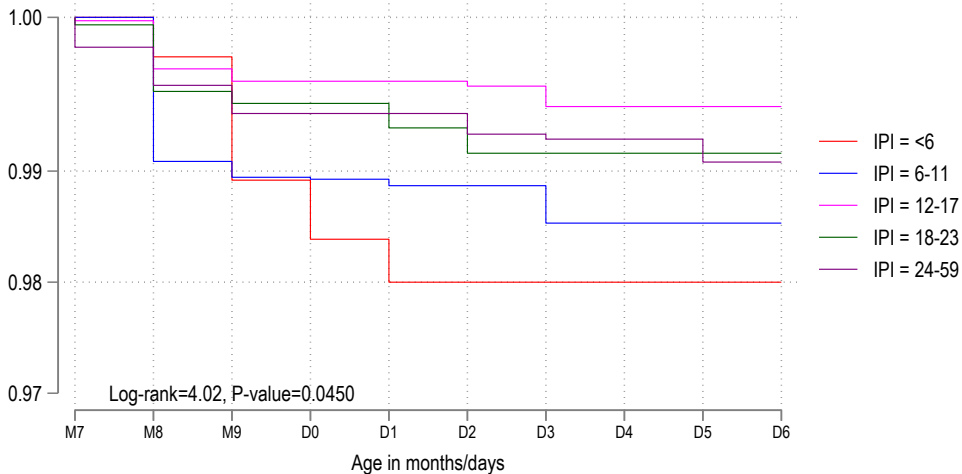

Number at risk

|             |     |     |     |     |     |     |     |     |     |     |
|-------------|-----|-----|-----|-----|-----|-----|-----|-----|-----|-----|
| IPI = <6    | 236 | 233 | 229 | 226 | 225 | 224 | 224 | 224 | 224 | 224 |
| IPI = 6-11  | 462 | 457 | 444 | 443 | 443 | 443 | 443 | 442 | 442 | 442 |
| IPI = 12-17 | 621 | 605 | 592 | 588 | 588 | 588 | 588 | 587 | 587 | 587 |
| IPI = 18-23 | 456 | 443 | 437 | 437 | 437 | 436 | 435 | 435 | 435 | 435 |
| IPI = 24-59 | 819 | 782 | 735 | 724 | 724 | 724 | 723 | 722 | 722 | 721 |

E-Figure 2: Survey-specific hazard ratios (HRs) of perinatal mortality, by IPI (months) following livebirth

A) IPI of less than 6 months versus IPI 18-23 months

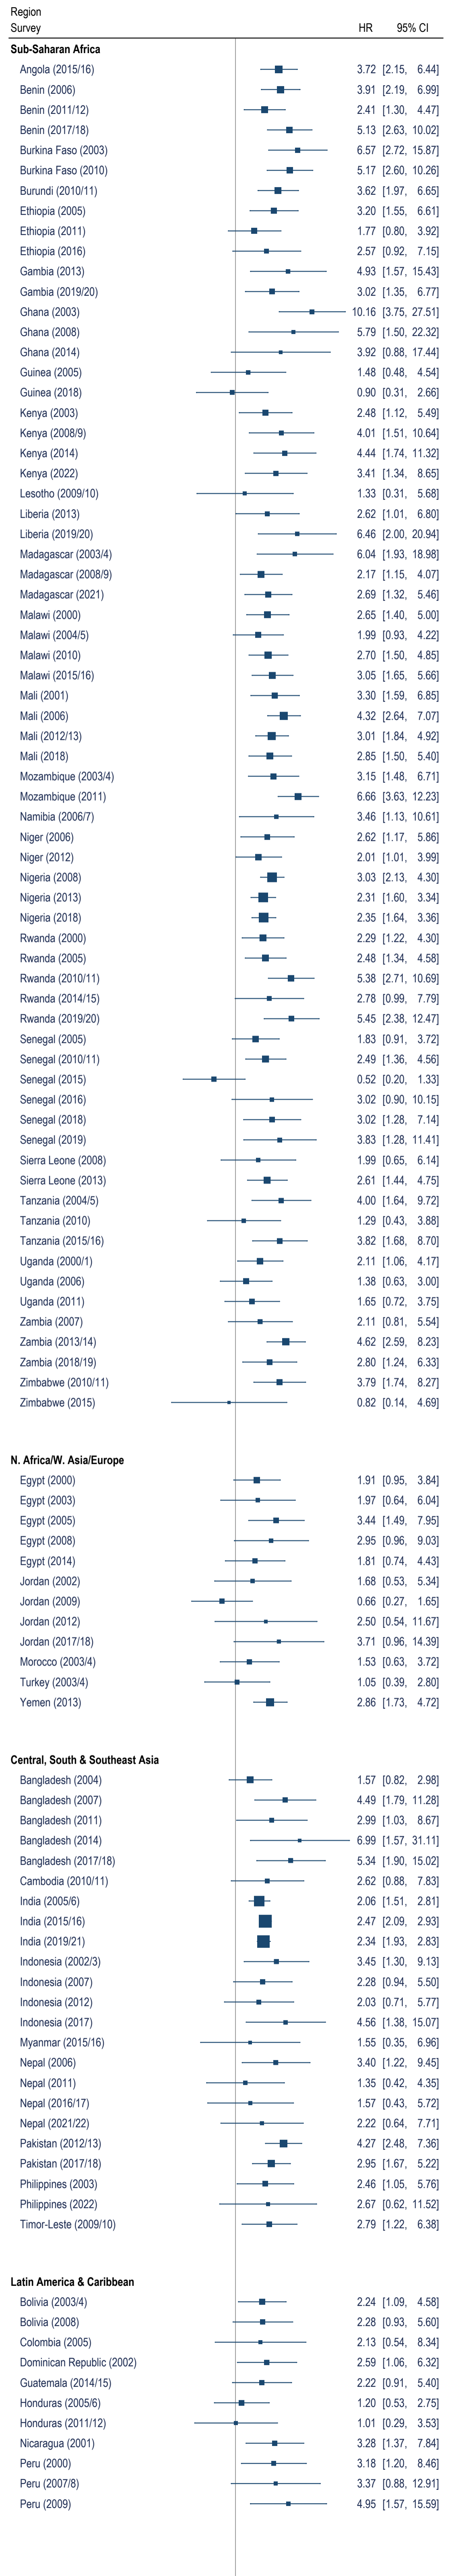

0.2 0.4 1.0 4.0 16.0  
Hazards ratio

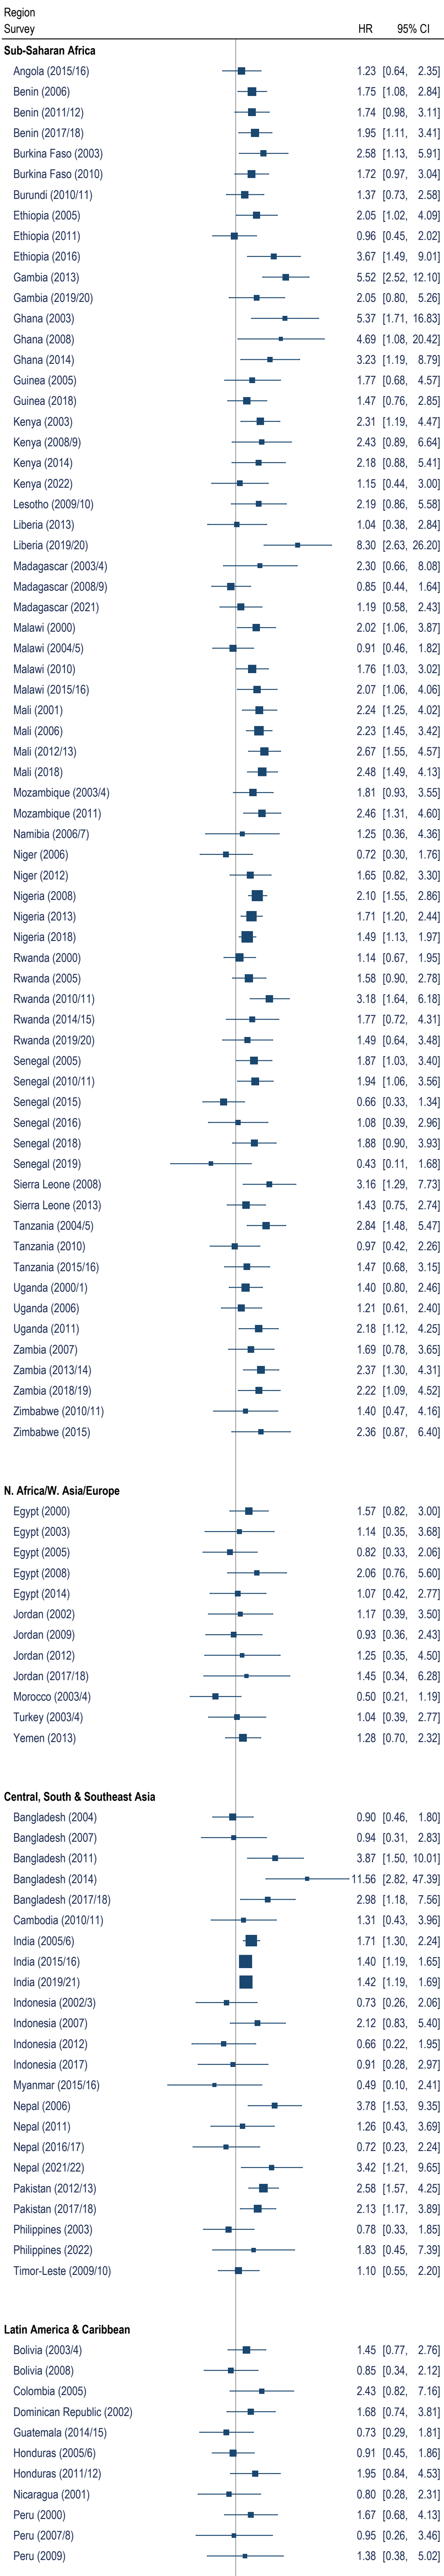

0.1 0.4 1.0 4.0 16.0

Hazards ratio

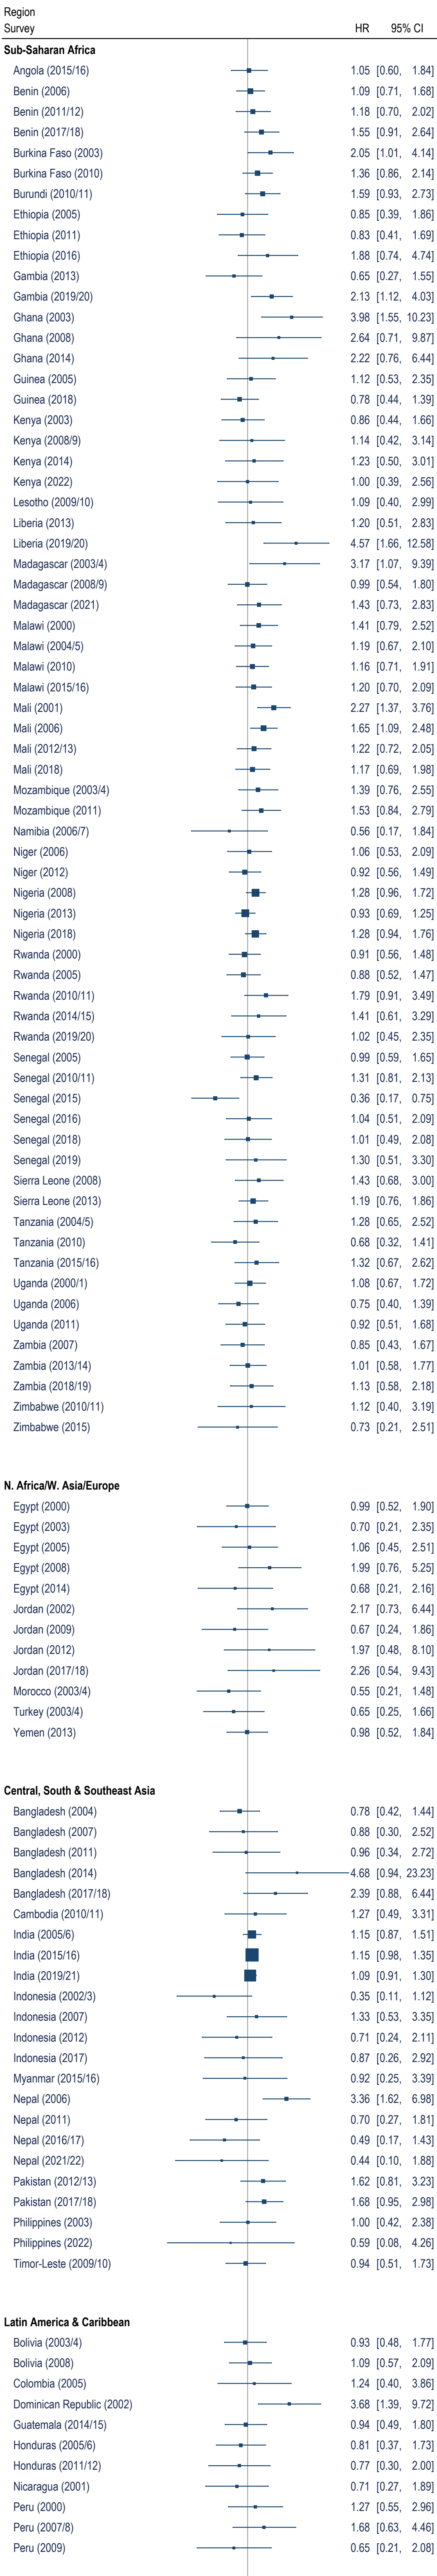

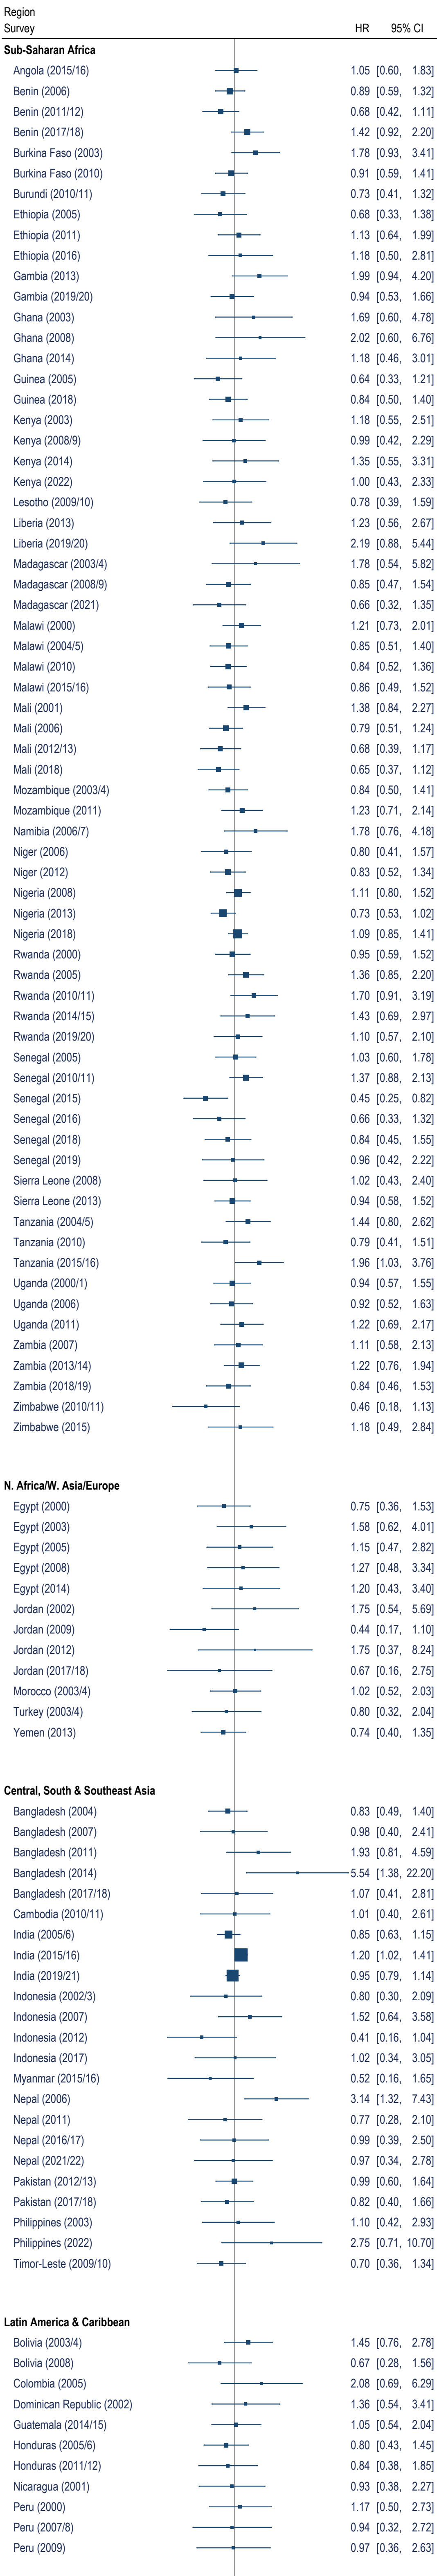

0.2 0.4 1.0 4.0 16.0

Hazards ratio

## E-Table 6: Tests of proportional-hazards assumption

| Region                    |             |         |
|---------------------------|-------------|---------|
| Survey                    | Chis-square | P-value |
| <b>sub-Saharan Africa</b> |             |         |
| Angola (2015/16)          | 0.8         | 0.381   |
| Benin (2006)              | 0.6         | 0.456   |
| Benin (2011/12)           | 1.4         | 0.237   |
| Benin (2017/18)           | 1.4         | 0.241   |
| Burkina Faso (2003)       | 0.9         | 0.352   |
| Burkina Faso (2010)       | 0.3         | 0.602   |
| Burundi (2010/11)         | 0.1         | 0.768   |
| Ethiopia (2005)           | 0.2         | 0.623   |
| Ethiopia (2011)           | 0.0         | 0.932   |
| Ethiopia (2016)           | 0.1         | 0.788   |
| Gambia (2013)             | 0.0         | 0.970   |
| Gambia (2019/20)          | 2.9         | 0.089   |
| Ghana (2003)              | 0.0         | 0.894   |
| Ghana (2008)              | 0.3         | 0.603   |
| Ghana (2014)              | 0.0         | 0.951   |
| Guinea (2005)             | 0.4         | 0.533   |
| Guinea (2018)             | 1.1         | 0.292   |
| Kenya (2003)              | 0.1         | 0.762   |
| Kenya (2008/9)            | 1.3         | 0.255   |
| Kenya (2014)              | 0.7         | 0.399   |
| Kenya (2022)              | 0.1         | 0.744   |
| Lesotho (2009/10)         | 0.4         | 0.515   |
| Liberia (2013)            | 0.6         | 0.437   |
| Liberia (2019/20)         | 0.0         | 0.826   |
| Madagascar (2003/4)       | 1.4         | 0.238   |
| Madagascar (2008/9)       | 1.4         | 0.234   |
| Madagascar (2021)         | 0.9         | 0.354   |
| Malawi (2000)             | 0.0         | 0.992   |
| Malawi (2004/5)           | 1.2         | 0.274   |
| Malawi (2010)             | 0.1         | 0.744   |
| Malawi (2015/16)          | 0.0         | 0.890   |
| Mali (2001)               | 0.3         | 0.590   |
| Mali (2006)               | 0.1         | 0.796   |
| Mali (2012/13)            | 0.0         | 0.982   |
| Mali (2018)               | 0.0         | 0.858   |
| Mozambique (2003/4)       | 2.0         | 0.161   |
| Mozambique (2011)         | 2.3         | 0.128   |
| Namibia (2006/7)          | 1.3         | 0.258   |
| Niger (2006)              | 0.6         | 0.443   |
| Niger (2012)              | 2.1         | 0.149   |
| Nigeria (2008)            | 2.5         | 0.111   |
| Nigeria (2013)            | 0.3         | 0.587   |
| Nigeria (2018)            | 0.0         | 0.842   |



|                                                       |            |              |
|-------------------------------------------------------|------------|--------------|
| Rwanda (2000)                                         | 0.0        | 0.899        |
| Rwanda (2005)                                         | 1.0        | 0.316        |
| Rwanda (2010/11)                                      | 0.2        | 0.617        |
| Rwanda (2014/15)                                      | 0.4        | 0.511        |
| Rwanda (2019/20)                                      | 1.2        | 0.276        |
| Senegal (2005)                                        | 3.0        | 0.083        |
| Senegal (2010/11)                                     | 0.8        | 0.379        |
| Senegal (2015)                                        | 0.2        | 0.669        |
| Senegal (2016)                                        | 0.0        | 0.860        |
| Senegal (2018)                                        | 0.7        | 0.393        |
| Senegal (2019)                                        | 0.6        | 0.424        |
| Sierra Leone (2008)                                   | 0.2        | 0.619        |
| Sierra Leone (2013)                                   | 0.0        | 0.901        |
| Tanzania (2004/5)                                     | 0.1        | 0.793        |
| <b>Tanzania (2010)</b>                                | <b>5.3</b> | <b>0.021</b> |
| <b>Tanzania (2015/16)</b>                             | <b>6.5</b> | <b>0.011</b> |
| Uganda (2000/1)                                       | 0.4        | 0.534        |
| Uganda (2006)                                         | 2.0        | 0.159        |
| Uganda (2011)                                         | 0.6        | 0.437        |
| Zambia (2007)                                         | 1.9        | 0.168        |
| Zambia (2013/14)                                      | 1.7        | 0.187        |
| Zambia (2018/19)                                      | 0.1        | 0.710        |
| Zimbabwe (2010/11)                                    | 0.9        | 0.345        |
| Zimbabwe (2015)                                       | 0.0        | 0.845        |
| <b><u>North Africa, Western Asia &amp; Europe</u></b> |            |              |
| Egypt (2000)                                          | 0.1        | 0.717        |
| Egypt (2003)                                          | 2.5        | 0.113        |
| Egypt (2005)                                          | 0.2        | 0.698        |
| Egypt (2008)                                          | 0.9        | 0.349        |
| Egypt (2014)                                          | 3.6        | 0.058        |
| Jordan (2002)                                         | 1.3        | 0.258        |
| Jordan (2009)                                         | 0.0        | 0.993        |
| Jordan (2012)                                         | 0.4        | 0.529        |
| <b>Jordan (2017/18)</b>                               | <b>6.1</b> | <b>0.014</b> |
| <b>Morocco (2003/4)</b>                               | <b>5.6</b> | <b>0.017</b> |
| Türkiye (2003/4)                                      | 0.7        | 0.390        |
| Yemen (2013)                                          | 0.6        | 0.452        |
| <b><u>Central, South &amp; Southeast Asia</u></b>     |            |              |
| Bangladesh (2004)                                     | 2.0        | 0.153        |
| Bangladesh (2007)                                     | 1.0        | 0.329        |
| Bangladesh (2011)                                     | 0.0        | 0.828        |
| Bangladesh (2014)                                     | 3.1        | 0.076        |
| Bangladesh (2017/18)                                  | 0.1        | 0.714        |
| Cambodia (2010/11)                                    | 0.1        | 0.811        |
| India (2005/6)                                        | 0.0        | 0.881        |
| India (2015/16)                                       | 0.4        | 0.525        |
| <b>India (2019/21)</b>                                | <b>5.8</b> | <b>0.016</b> |
| <b>Indonesia (2002/3)</b>                             | <b>7.9</b> | <b>0.005</b> |
| Indonesia (2007)                                      | 1.4        | 0.240        |
| <b>Indonesia (2012)</b>                               | <b>4.2</b> | <b>0.040</b> |

|                                             |            |              |
|---------------------------------------------|------------|--------------|
| Indonesia (2017)                            | 1.4        | 0.245        |
| Myanmar (2015/16)                           | 0.9        | 0.342        |
| Nepal (2006)                                | 0.3        | 0.569        |
| Nepal (2011)                                | 1.8        | 0.185        |
| Nepal (2016/17)                             | 0.4        | 0.552        |
| Nepal (2021/22)                             | 0.1        | 0.744        |
| <b>Pakistan (2012/13)</b>                   | <b>4.1</b> | <b>0.042</b> |
| Pakistan (2017/18)                          | 0.7        | 0.399        |
| Philippines (2003)                          | 1.2        | 0.271        |
| Philippines (2022)                          | 0.3        | 0.602        |
| Timor-Leste (2009/10)                       | 0.5        | 0.480        |
| <b><u>Latin America &amp; Caribbean</u></b> |            |              |
| Bolivia (2003/4)                            | 0.1        | 0.726        |
| Bolivia (2008)                              | 0.2        | 0.639        |
| Colombia (2005)                             | 0.2        | 0.635        |
| <b>Dominican Republic (2002)</b>            | <b>4.6</b> | <b>0.031</b> |
| Guatemala (2014/15)                         | 0.0        | 0.890        |
| Honduras (2005/6)                           | 0.1        | 0.819        |
| <b>Honduras (2011/12)</b>                   | <b>4.5</b> | <b>0.035</b> |
| Nicaragua (2001)                            | 0.0        | 0.945        |
| Peru (2000)                                 | 2.3        | 0.132        |
| Peru (2007/8)                               | 1.6        | 0.211        |
| Peru (2009)                                 | 1.8        | 0.178        |

---

The 10 surveys highlighted in red were excluded for the sensitivity analysis as the hazards-proportional assumption did not hold, p-value <0.05.

E-Table 7: The pooled hazard ratios (HRs) of perinatal mortality by IPI preceded by livebirth for surveys that met the proportionality assumption

|                                 | Pooled      | 95%CI        |   |              |
|---------------------------------|-------------|--------------|---|--------------|
| <b>Inter-pregnancy interval</b> |             |              |   |              |
| <6 months                       | <b>2.74</b> | <b>(2.53</b> | - | <b>2.97)</b> |
| 6-11 months                     | <b>1.68</b> | <b>(1.55</b> | - | <b>1.81)</b> |
| 12-17 months                    | <b>1.16</b> | <b>(1.10</b> | - | <b>1.23)</b> |
| 18-23 months                    | 1.00        |              |   |              |
| 24-59 months                    | 1.01        | (0.95        | - | 1.07)        |

Based on 103 surveys.

# E-Figure 3: Survey-specific hazard ratios of perinatal mortality, by IPI (months) following Stillbirth

A) IPI of less than 3 months versus IPI 3+ months

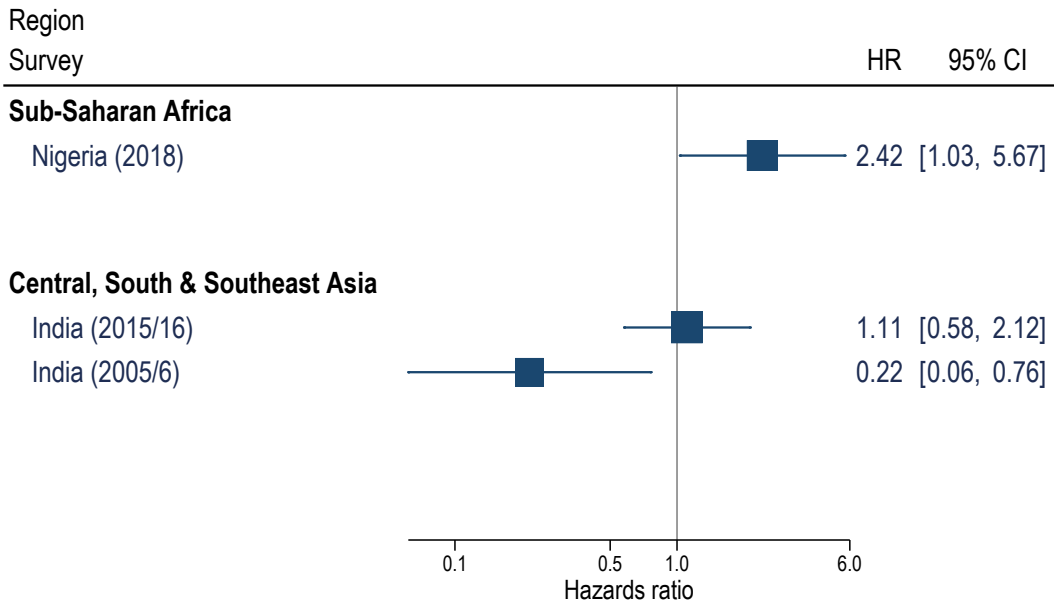

B) IPI of less than 6 months versus IPI 6+ months

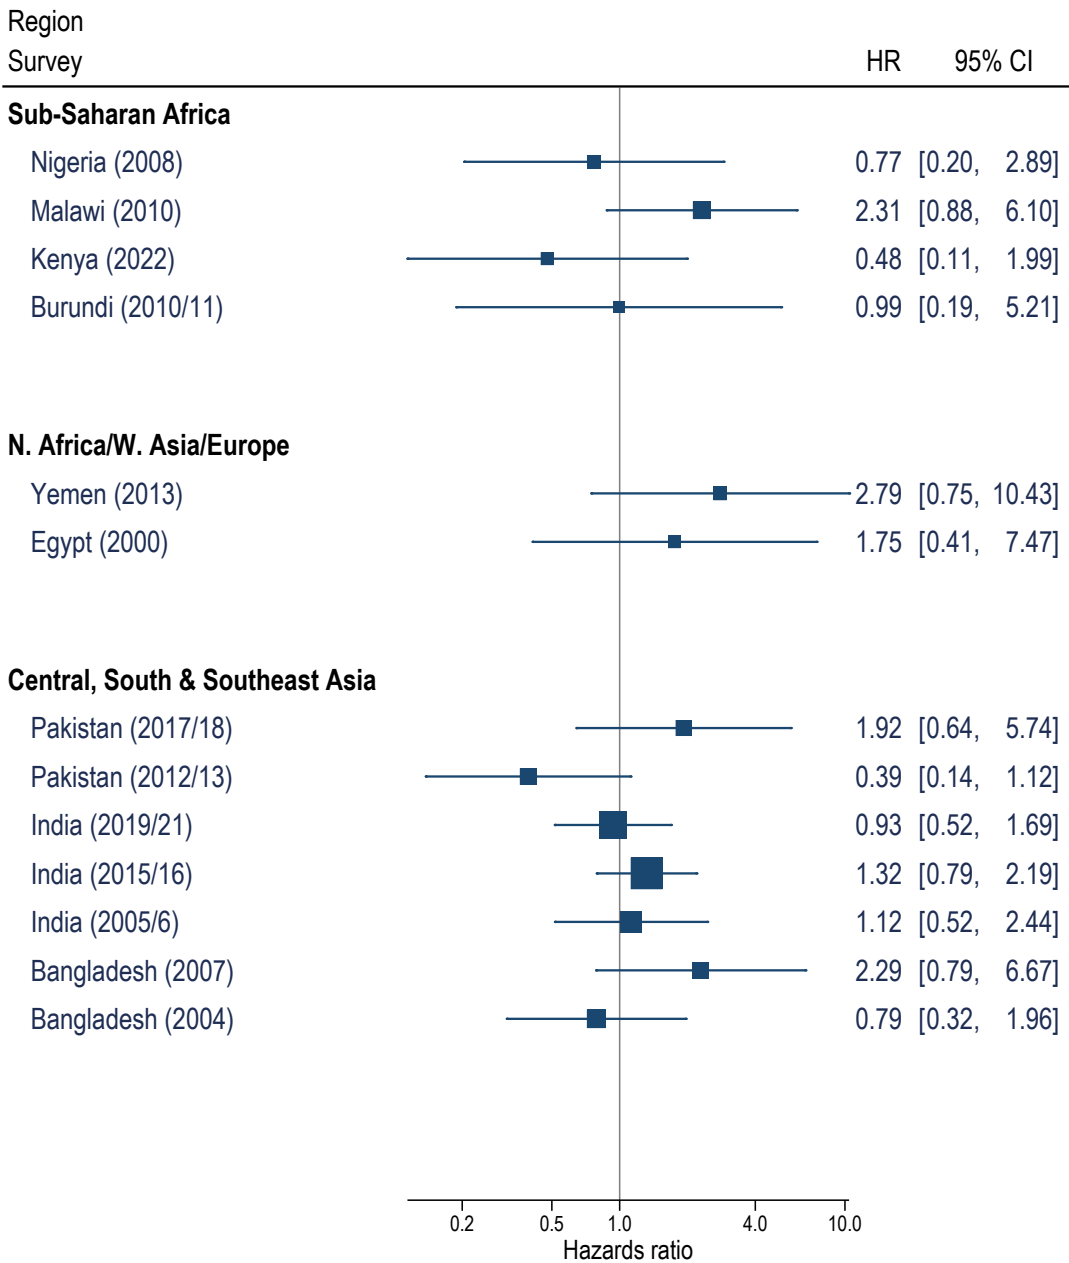

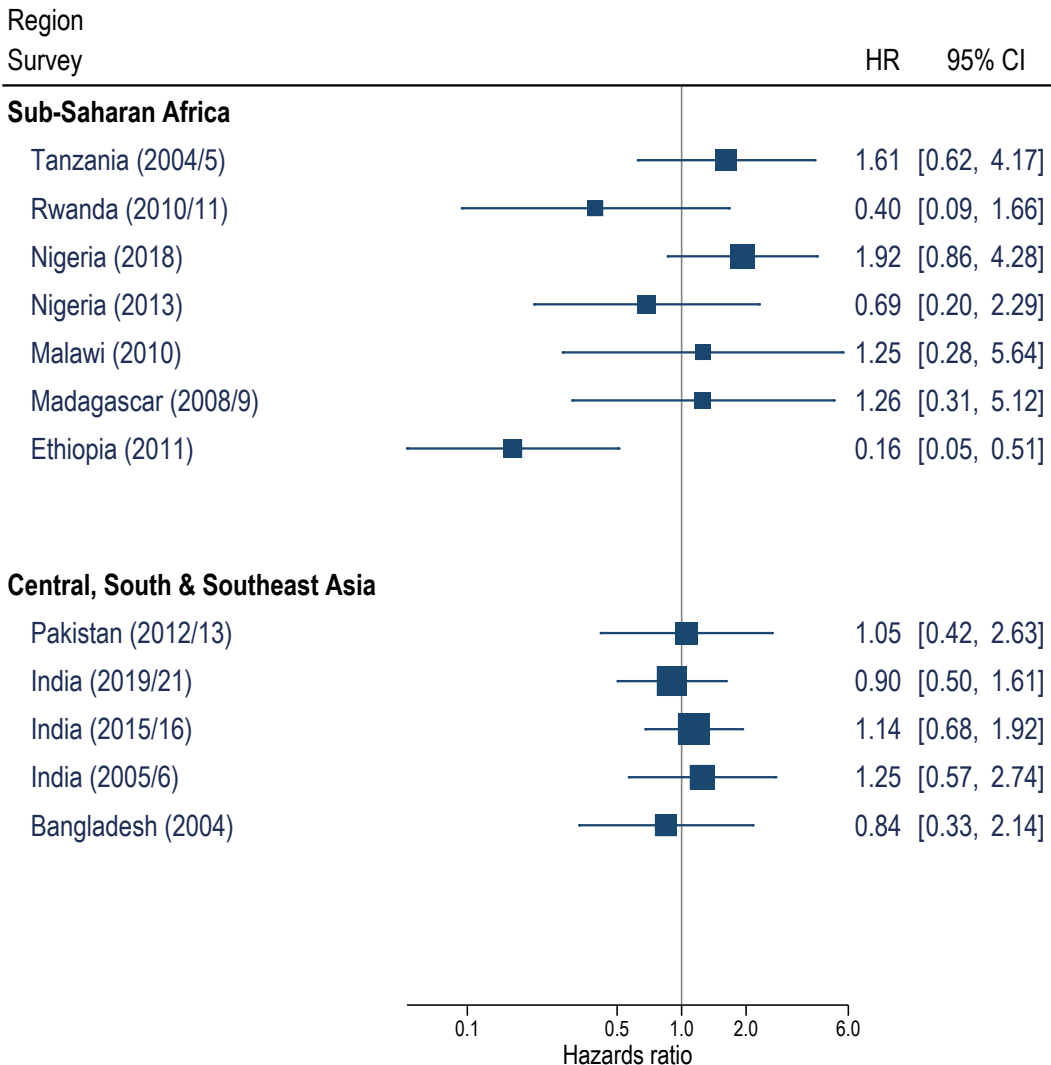

E-Figure 4: Survey-specific hazard ratios of perinatal mortality, by IPI (months) following abortion

A) IPI of less than 3 months versus IPI 3+ months

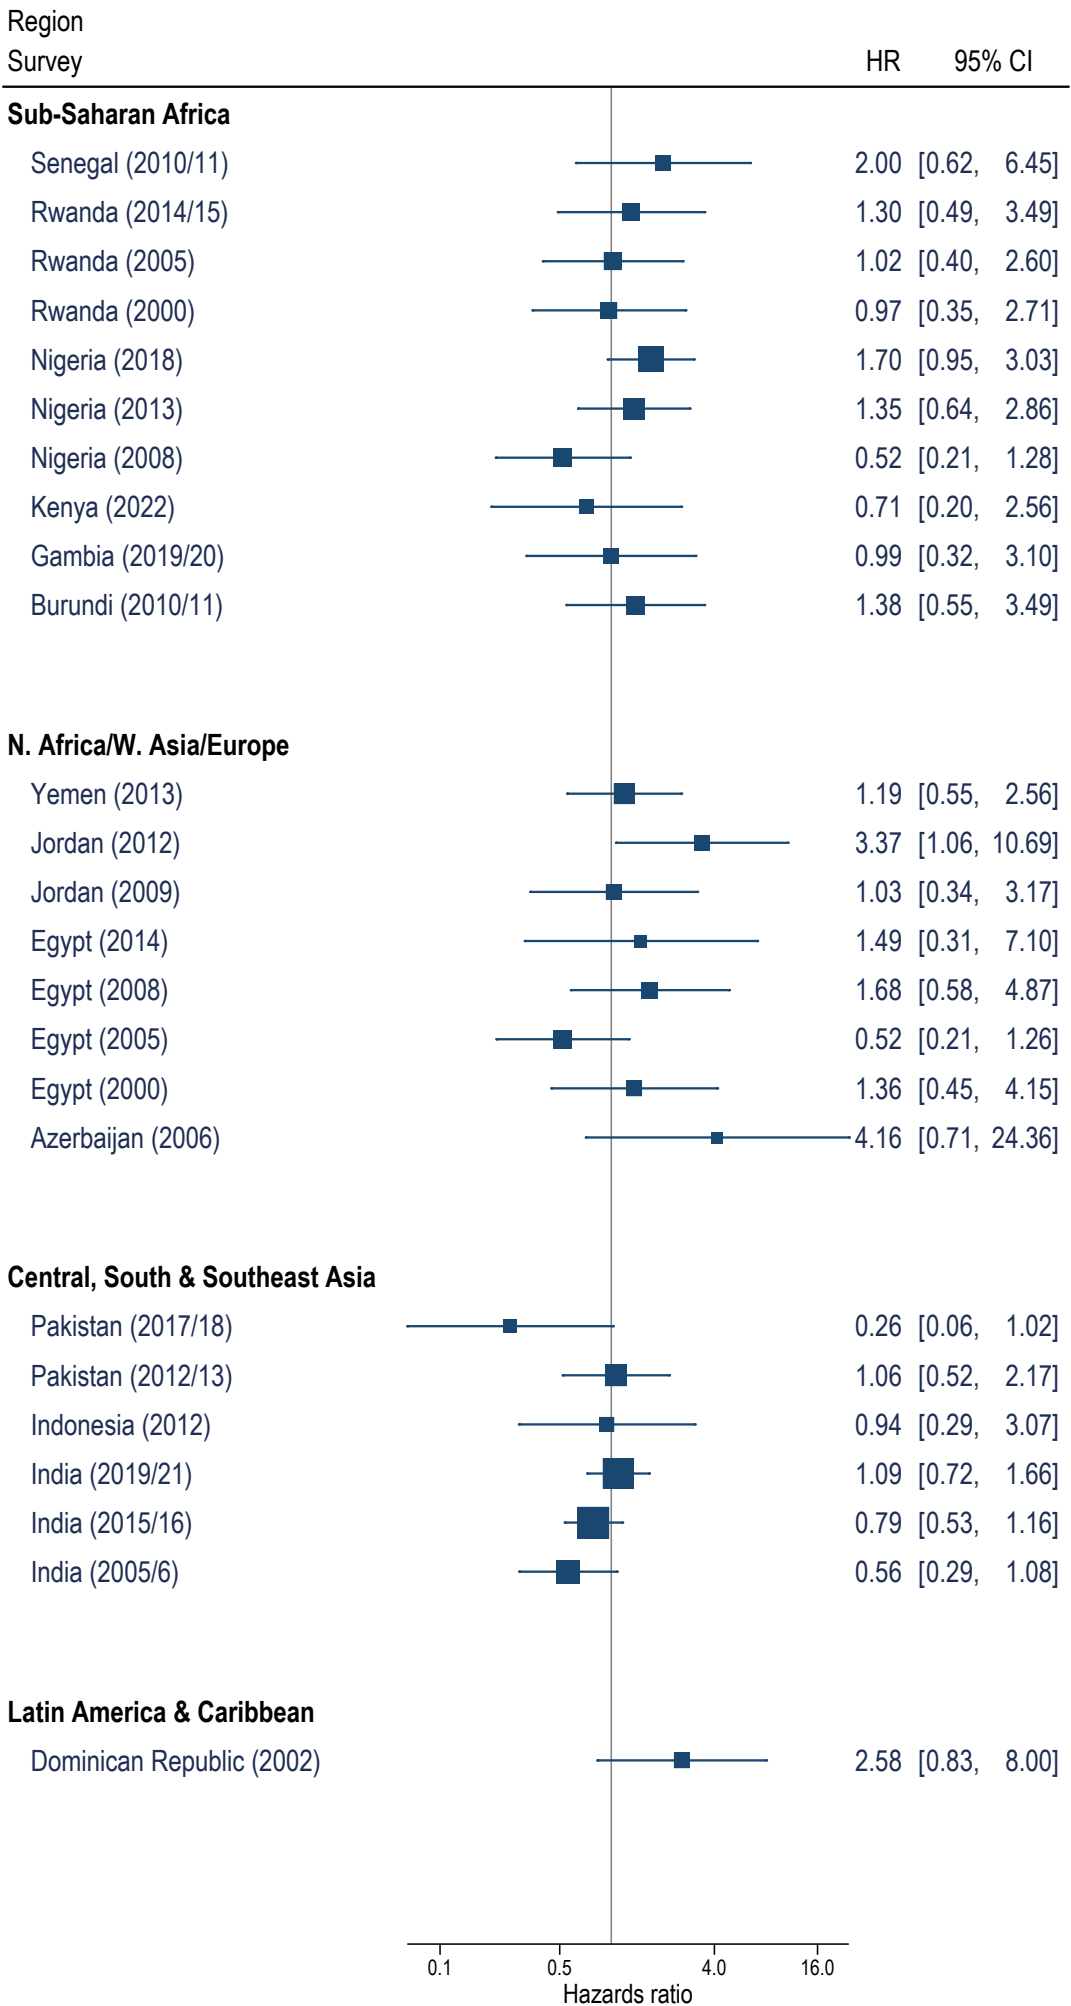

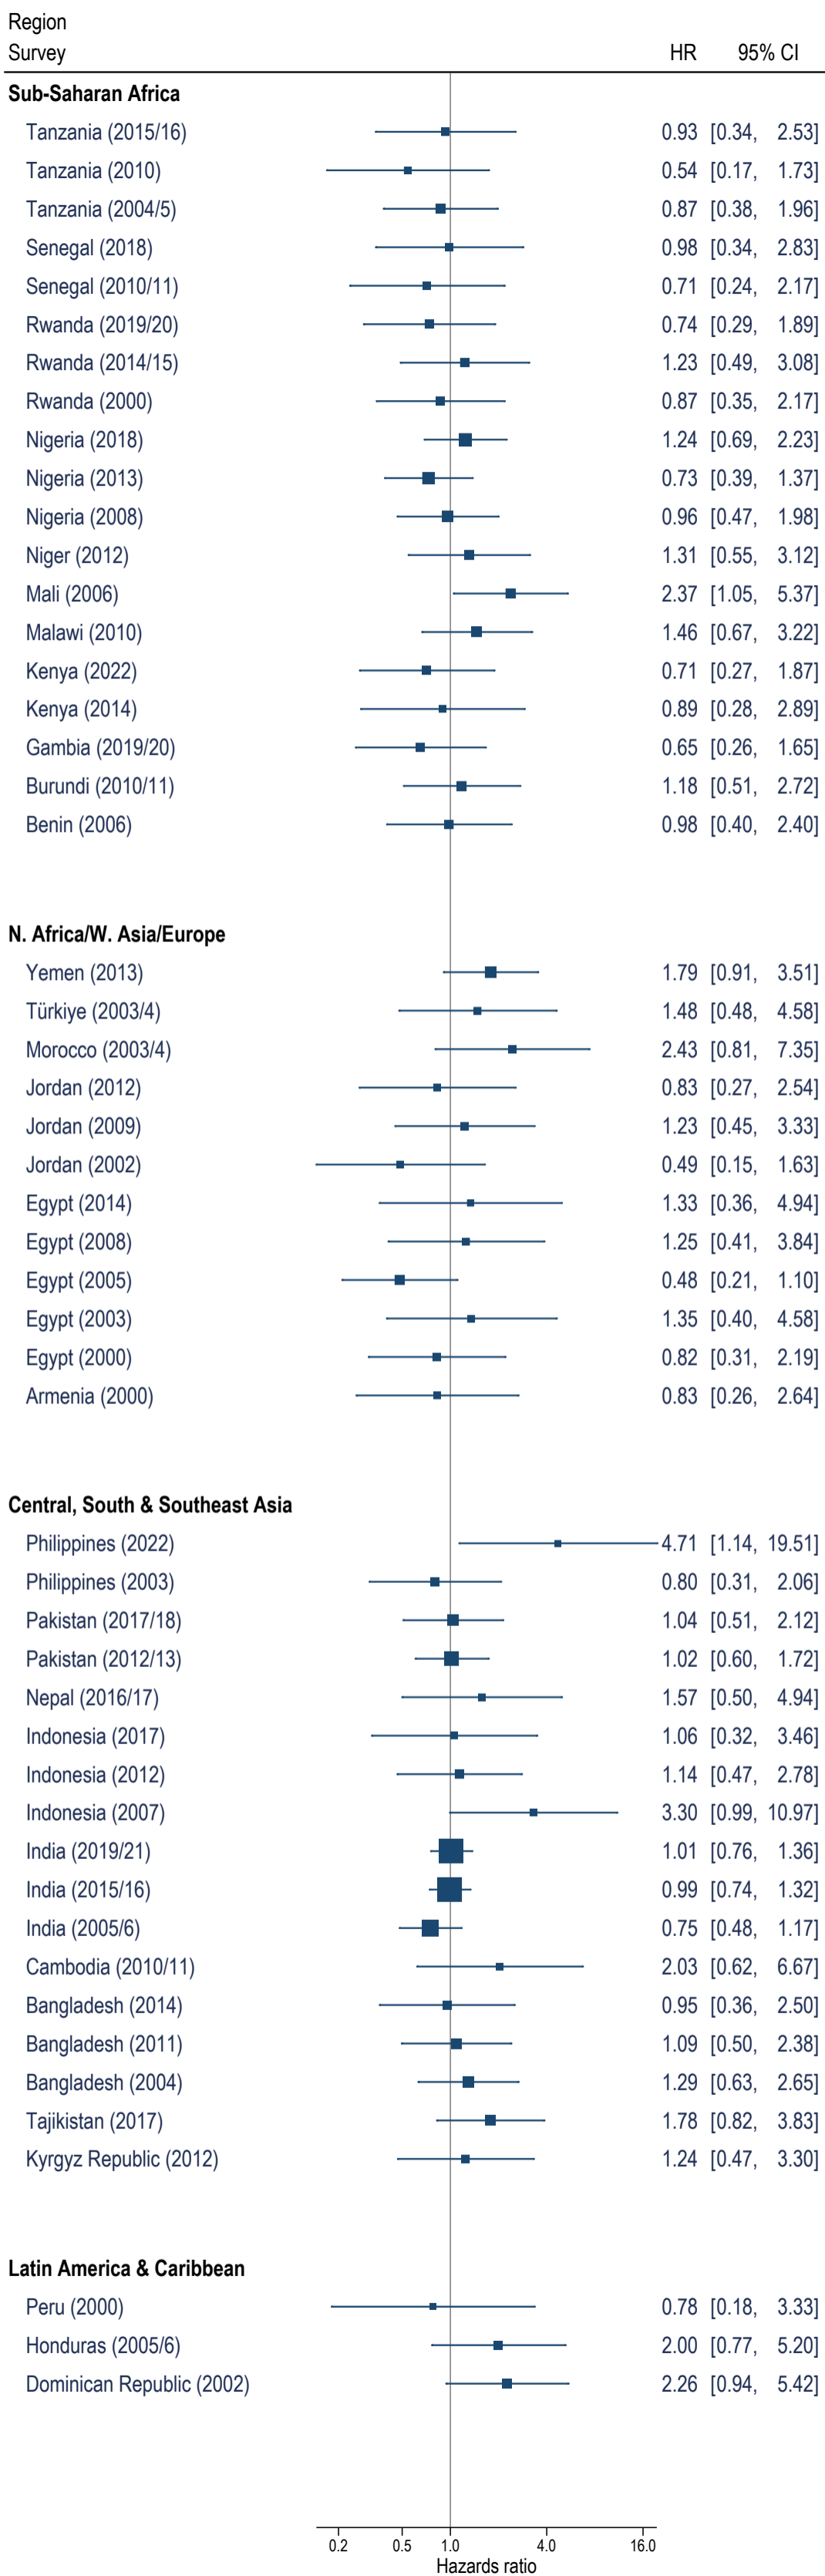



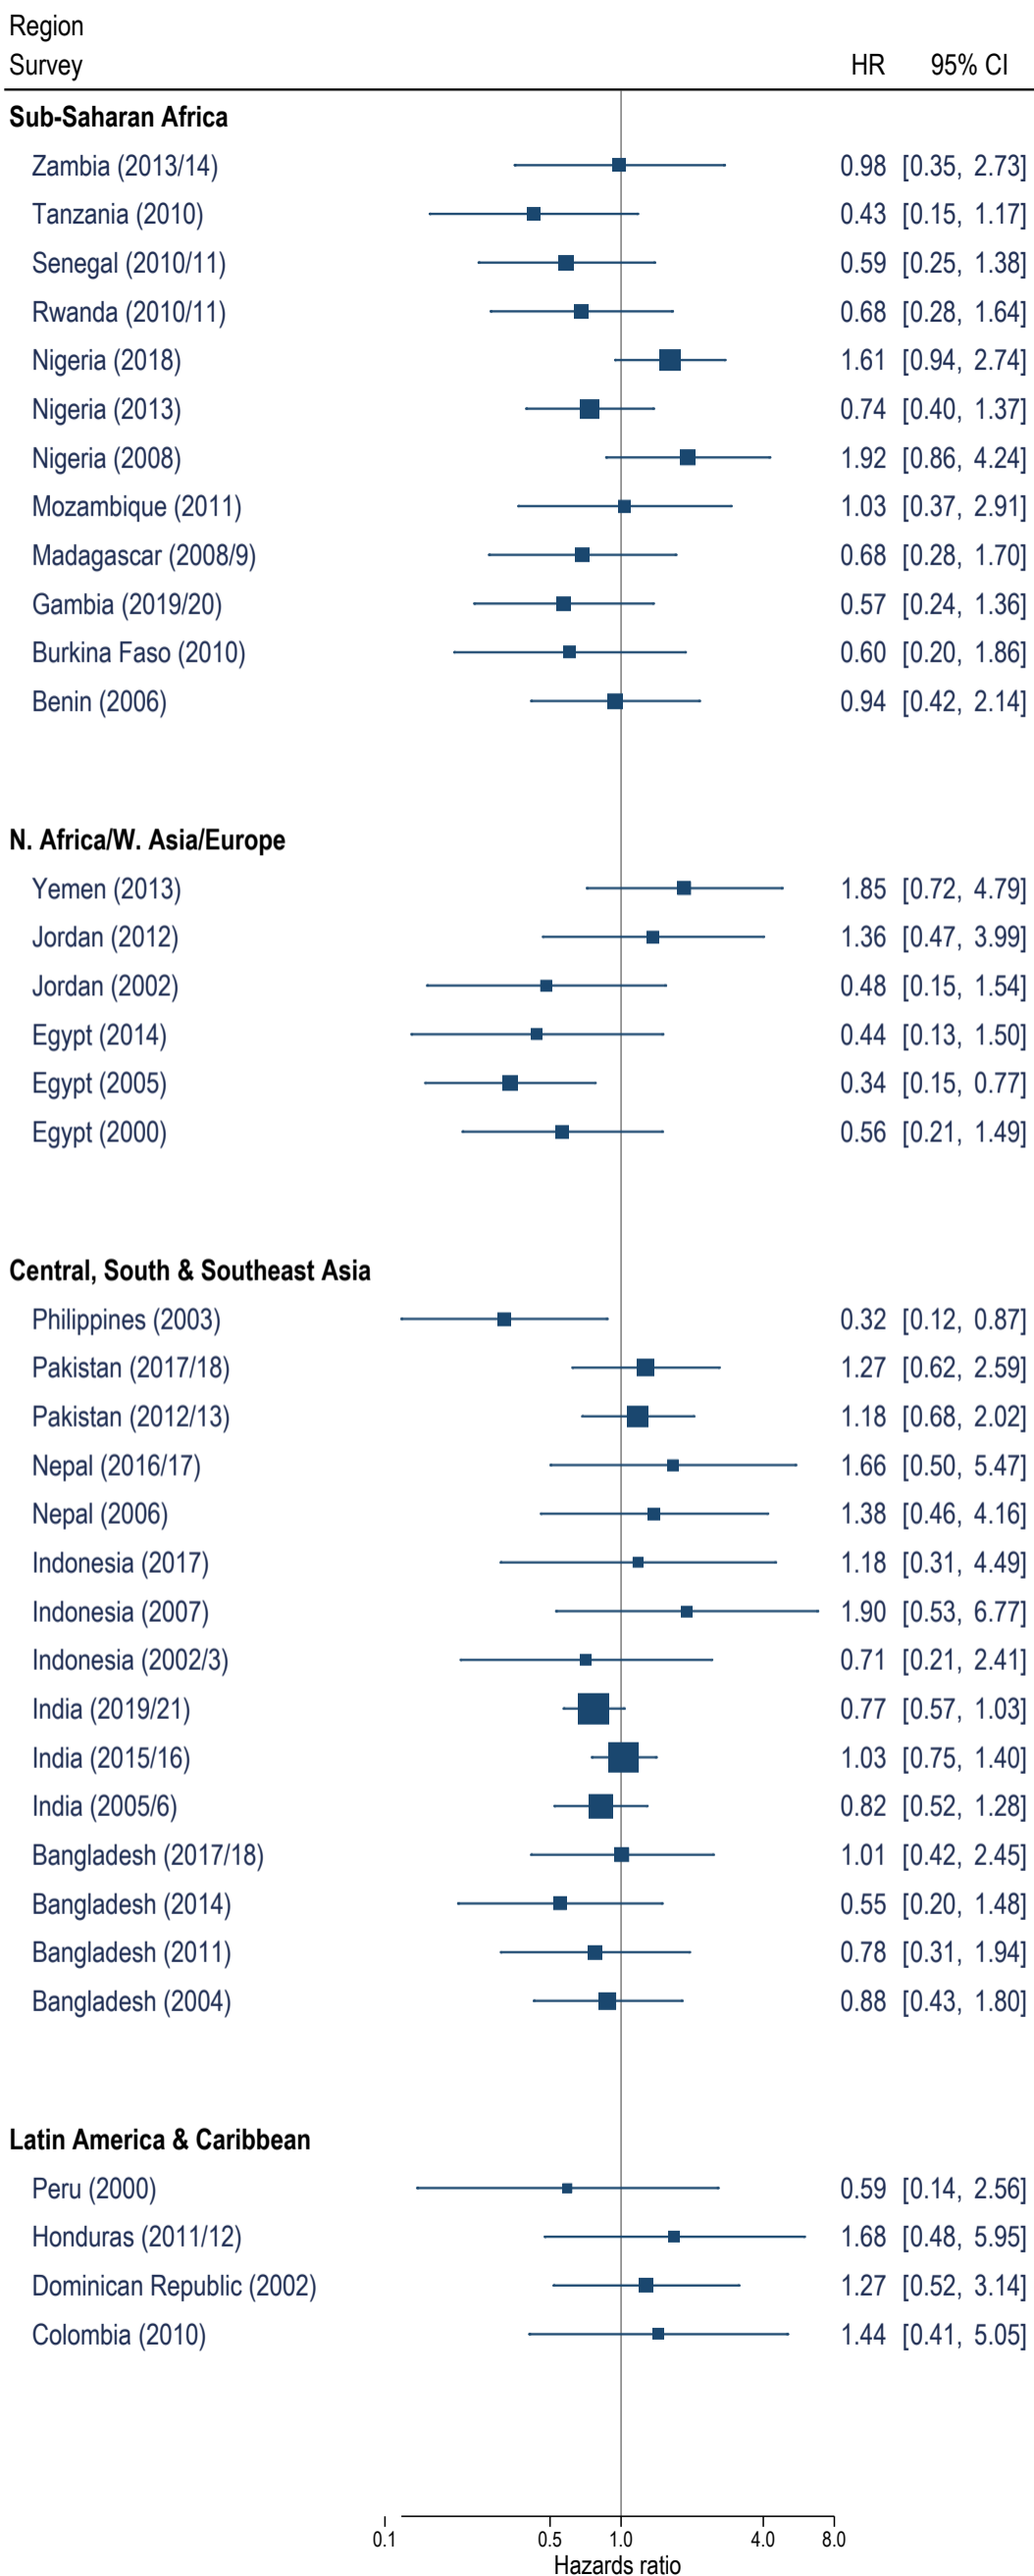

E-Figure 5: Correlation of median IPI with contraceptive failure rate, at survey level for the most recent DHS surveys

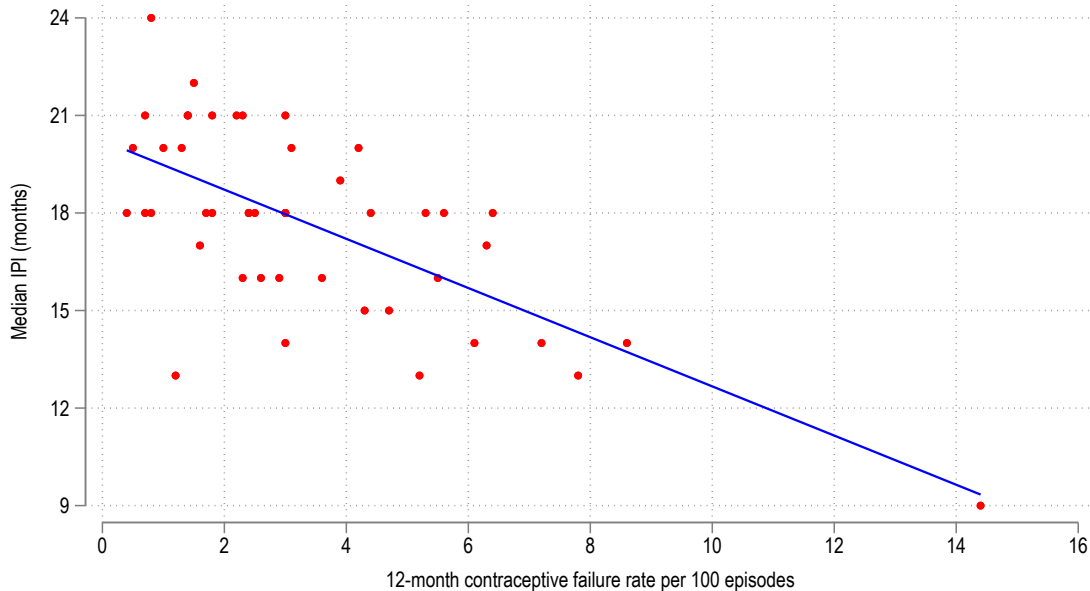

Supplement: mmc1.pdf [file mmc1.pdf]
